# Supplementary material for: Correlative Gene Expression to Protective Seroconversion in Rift Valley Fever Vaccinates
Source: PLoS One. 2016 Jan 19;11(1):e0147027. doi: 10.1371/journal.pone.0147027 (PMC4718665; doi:10.1371/journal.pone.0147027)
Supplement: S3 Table — (XLSX) [file pone.0147027.s003.xlsx]

## Sheet: Sheet1
TABLE S3. List of significantly scored genes by days post immunization using DESeq with a |Z-score| > 2.24 combined with false discovery rate of 5% or QV of 0.05 threshold.
Symbol	Description	Day 2 Bayesian Zscore	QV	Probe		Symbol	Description	Day 3 Bayesian Zscore	QV	Probe		Symbol	Description	Day 4 Bayesian Zscore	QV	Probe		Symbol	Description	Day 5 Bayesian Zscore	QV	Probe		Symbol	Description	Day 6 Bayesian Zscore	QV	Probe		Symbol	Description	Day 7 Bayesian Zscore	QV	Probe		Symbol	Description	Day 10 Bayesian Zscore	QV	Probe		Symbol	Description	Day 14 Bayesian Zscore	QV	Probe		Symbol	Description
LOC781036	DnaJ (Hsp40) homolog, subfamily C, member 1	4.158	0	XM_003586766.1		LOC507055	guanylate binding protein 4-like	4.111	0	XM_002686269.2		BLNK	B-cell linker	4.411	0	NM_001046054.1		LOC100298723	myotubularin-related protein 8-like	4.292	0	XM_003588185.1		LSP1	lymphocyte-specific protein 1	4.892	0	NM_001075374.1		LSP1	lymphocyte-specific protein 1	3.06	0.009	NM_001075374.1		AKAP13	A kinase (PRKA) anchor protein 13	4.892	0	XM_002696531.2		LOC100298723	myotubularin-related protein 8-like	4.892	0.001	XM_003588185.1		GNL3L	guanine nucleotide binding protein-like 3 (nucleolar)-like
ZNF609	zinc finger protein 609	3.936	0	NM_001193023.1		GPHN	gephyrin	3.525	0	XM_003586590.1		SCFD2	sec1 family domain containing 2	4.204	0	NM_001078005.1		STAG1	stromal antigen 1	4.281	0	XM_002685052.2		LOC100298723	myotubularin-related protein 8-like	4.56	0	XM_003588185.1		ITGA4	integrin, alpha 4 (antigen CD49D, alpha 4 subunit of VLA-4 receptor)	3.026	0.009	NM_174748.1		AKAP8L	A kinase (PRKA) anchor protein 8-like	4.892	0	XM_002688560.2		LSP1	lymphocyte-specific protein 1	4.892	0.001	NM_001075374.1		LOC100298723	myotubularin-related protein 8-like
ZFAND3	zinc finger, AN1-type domain 3	3.905	0	NM_001102145.1		TNFSF10	tumor necrosis factor (ligand) superfamily, member 10	3.418	0	XM_002684917.1		RAPGEF1	Rap guanine nucleotide exchange factor (GEF) 1	4.162	0	NM_001205872.1		EXOC4	exocyst complex component 4	4.248	0	NM_001102207.1		SLC2A13	solute carrier family 2 (facilitated glucose transporter), member 13	4.193	0	NM_001192963.1		ZFAND3	zinc finger, AN1-type domain 3	2.905	0.01	NM_001102145.1		ARHGEF1	Rho guanine nucleotide exchange factor (GEF) 1	4.892	0	XM_002695075.2		SIK3	SIK family kinase 3	4.826	0.001	XM_002693024.2		LOC100848544	uncharacterized LOC100848544
MACF1	microtubule-actin crosslinking factor 1	3.897	0	NM_001143860.1		LOC787099	zinc finger, CCHC domain containing 2	3.276	0	XM_003587776.1		RUNX1T1	runt-related transcription factor 1; translocated to, 1 (cyclin D-related)	4.075	0	NM_001099385.1		SIK3	SIK family kinase 3	4.195	0	XM_002693024.2		SIK3	SIK family kinase 3	4.106	0	XM_002693024.2		SIK3	SIK family kinase 3	2.864	0.01	XM_002693024.2		ARHGEF18	Rho/Rac guanine nucleotide exchange factor (GEF) 18	4.892	0	XM_002688833.2		STAG1	stromal antigen 1	4.47	0.002	XM_002685052.2		LOC782246	uncharacterized LOC782246
FOXP1	forkhead box P1	3.883	0	NM_001083689.1		EPSTI1	epithelial stromal interaction 1 (breast)	3.228	0	XM_002691775.2		ZEB2	zinc finger E-box binding homeobox 2	3.969	0	NM_001076192.1		ZEB1	zinc finger E-box binding homeobox 1	4.122	0	NM_001206590.1		EXOC4	exocyst complex component 4	4.003	0	NM_001102207.1		ZNRF2	zinc and ring finger 2	2.861	0.01	NM_001105443.1		ARID1A	AT rich interactive domain 1A (SWI-like)	4.892	0	NM_001205785.1		ZFAND3	zinc finger, AN1-type domain 3	4.428	0.002	NM_001102145.1		LSP1	lymphocyte-specific protein 1
RERE	arginine-glutamic acid dipeptide (RE) repeats	3.877	0	XM_002694049.1		FCHSD2	FCH and double SH3 domains 2	3.128	0	XM_002693439.2		LSP1	lymphocyte-specific protein 1	3.937	0	NM_001075374.1		TCF12	transcription factor 12	4.102	0	NM_001077885.1		ZFAND3	zinc finger, AN1-type domain 3	3.943	0	NM_001102145.1		CAMK2D	calcium/calmodulin-dependent protein kinase II delta	2.85	0.01	NM_001046333.1		BCL2	B-cell CLL/lymphoma 2	4.892	0	NM_001166486.1		MGAT4A	mannosyl (alpha-1,3-)-glycoprotein beta-1,4-N-acetylglucosaminyltransferase, isozyme A	4.381	0.003	NM_177520.2		PACS1	phosphofurin acidic cluster sorting protein 1
RYBP	RING1 and YY1 binding protein	3.866	0	XM_002696972.2		ATP8B4	probable phospholipid-transporting ATPase IM-like	3.127	0	XM_002690973.1		EBF1	early B-cell factor 1	3.68	0	NM_001192916.1		GTDC1	glycosyltransferase-like domain containing 1	4.096	0	NM_001076035.1		ATRN	attractin	3.925	0	NM_173995.2		LRRC8D	leucine rich repeat containing 8 family, member D	2.83	0.01	NM_001083741.1		CAMK1D	calcium/calmodulin-dependent protein kinase ID	4.892	0	XM_002692061.2		TMEM163	transmembrane protein 163	4.357	0.003	NM_001101160.1		PRKCB	protein kinase C, beta
STAG1	stromal antigen 1	3.849	0	XM_002685052.2		PAPD4	PAP associated domain containing 4	3.092	0	NM_001046361.1		SLC35D2	solute carrier family 35, member D2	3.654	0	NM_001206266.1		MGAT4A	mannosyl (alpha-1,3-)-glycoprotein beta-1,4-N-acetylglucosaminyltransferase, isozyme A	4.078	0	NM_177520.2		TMEM163	transmembrane protein 163	3.917	0	NM_001101160.1		FCHSD2	FCH and double SH3 domains 2	2.819	0.01	XM_002693439.2		CIITA	class II, major histocompatibility complex, transactivator	4.892	0	XM_002697962.1		ZEB1	zinc finger E-box binding homeobox 1	4.336	0.003	NM_001206590.1		SIK3	SIK family kinase 3
SIK3	SIK family kinase 3	3.748	0	XM_002693024.2		IFI16	interferon, gamma-inducible protein 16	3.085	0	XM_002685877.1		LOC100296943	uncharacterized LOC100296943	3.618	0	XM_002690187.1		CAMK2D	calcium/calmodulin-dependent protein kinase II delta	4.043	0	NM_001046333.1		CDH10	cadherin 10, type 2 (T2-cadherin)	3.852	0	NM_001076266.2		PLCL2	phospholipase C-like 2	2.815	0.01	NM_001192255.1		DIP2B	DIP2 disco-interacting protein 2 homolog B (Drosophila)	4.892	0	NM_001192309.1		CAMK2D	calcium/calmodulin-dependent protein kinase II delta	4.304	0.003	NM_001046333.1
SKAP1	src kinase associated phosphoprotein 1	3.747	0	XM_002695944.2		NMI	N-myc (and STAT) interactor	3.075	0	NM_001035098.1		LOC100298723	myotubularin-related protein 8-like	3.613	0	XM_003588185.1		ZFAND3	zinc finger, AN1-type domain 3	4.005	0	NM_001102145.1		SMYD3	SET and MYND domain containing 3	3.847	0	NM_001076406.1		LOC782246	uncharacterized LOC782246	2.785	0.011	XM_003585759.1		ETS1	v-ets erythroblastosis virus E26 oncogene homolog 1 (avian)	4.892	0	NM_001099106.1		PHF21A	PHD finger protein 21A	4.285	0.003	NM_001206197.1
TNFSF10	tumor necrosis factor (ligand) superfamily, member 10	3.745	0	XM_003585672.1		CD274	CD274 molecule	3.04	0	NM_001163412.1		AVEN	apoptosis, caspase activation inhibitor	3.591	0	XM_002690781.2		ELMO1	engulfment and cell motility 1	4.001	0	NM_001113227.1		LOC782246	uncharacterized LOC782246	3.798	0	XM_003585759.1		ZEB1	zinc finger E-box binding homeobox 1	2.784	0.011	NM_001206590.1		ETV6	ets variant 6	4.892	0	NM_001015514.2		LOC782246	uncharacterized LOC782246	4.275	0.003	XM_003585759.1
ARID5B	AT rich interactive domain 5B (MRF1-like)	3.72	0	XM_002698842.2		LOC514143	guanylate binding protein 2, interferon-inducible	3.017	0	XM_002686265.1		KDM6A	lysine (K)-specific demethylase 6A	3.573	0	NM_001206575.1		FCHSD2	FCH and double SH3 domains 2	3.995	0	XM_002693439.2		PDGFD	platelet derived growth factor D	3.798	0	NM_001083706.1		MGAT4A	mannosyl (alpha-1,3-)-glycoprotein beta-1,4-N-acetylglucosaminyltransferase, isozyme A	2.761	0.011	NM_177520.2		EXT1	exostosin 1	4.892	0	NM_001098095.1		PACS1	phosphofurin acidic cluster sorting protein 1	4.255	0.003	NM_001143870.1
ZBTB20	zinc finger and BTB domain containing 20	3.698	0	XM_003585640.1		TDRD7	tudor domain containing 7	3.012	0	NM_001100309.1		C1H3orf70	chromosome 1 open reading frame, human C3orf70	3.514	0	NM_001195030.1		ARL15	ADP-ribosylation factor-like 15	3.982	0	NM_001014943.1		C1H3orf70	chromosome 1 open reading frame, human C3orf70	3.753	0	NM_001195030.1		BCAS3	breast carcinoma amplified sequence 3	2.717	0.012	XM_002695612.2		FAM107B	family with sequence similarity 107, member B	4.892	0	NM_001046393.1		TMEM164	transmembrane protein 164	4.226	0.003	NM_001031762.1
MAN2A1	mannosidase, alpha, class 2A, member 1	3.678	0	NM_001205886.1		SP140L	SP140 nuclear body protein-like	3	0	NM_001130765.1		Mar-1	membrane-associated ring finger (C3HC4) 1	3.512	0	NM_001193149.1		ZNRF2	zinc and ring finger 2	3.975	0	NM_001105443.1		STAG1	stromal antigen 1	3.644	0	XM_002685052.2		EXOC4	exocyst complex component 4	2.705	0.012	NM_001102207.1		FOXN3	forkhead box N3	4.892	0	NM_001206687.1		ITGA4	integrin, alpha 4 (antigen CD49D, alpha 4 subunit of VLA-4 receptor)	4.169	0.004	NM_174748.1
HDAC8	histone deacetylase 8	3.646	0	NM_001076231.1		USP25	ubiquitin specific peptidase 25	3	0	XM_002684646.2		FCRL1	Fc receptor-like 1	3.499	0	NM_001102045.1		MAN2A1	mannosidase, alpha, class 2A, member 1	3.904	0	NM_001205886.1		GTDC1	glycosyltransferase-like domain containing 1	3.643	0	NM_001076035.1		LOC100298723	myotubularin-related protein 8-like	2.697	0.012	XM_003588185.1		GNL3L	guanine nucleotide binding protein-like 3 (nucleolar)-like	4.892	0	NM_001034307.1		SLC2A13	solute carrier family 2 (facilitated glucose transporter), member 13	4.061	0.005	NM_001192963.1
ZEB1	zinc finger E-box binding homeobox 1	3.561	0	NM_001206590.1		PARP12	poly (ADP-ribose) polymerase family, member 12	2.979	0	NM_001192344.1		EIF4G3	eukaryotic translation initiation factor 4 gamma, 3	3.491	0	XM_003585797.1		ITGA4	integrin, alpha 4 (antigen CD49D, alpha 4 subunit of VLA-4 receptor)	3.896	0	NM_174748.1		ARL15	ADP-ribosylation factor-like 15	3.626	0	NM_001014943.1		GNL3L	guanine nucleotide binding protein-like 3 (nucleolar)-like	2.688	0.012	NM_001034307.1		GRK5	G protein-coupled receptor kinase 5	4.892	0	NM_174331.2		EIF4G3	eukaryotic translation initiation factor 4 gamma, 3	4.03	0.027	XM_003585797.1
TTC17	tetratricopeptide repeat domain 17	3.557	0	NM_001205309.1		ZNRF2	zinc and ring finger 2	2.969	0	NM_001105443.1		BCL11A	B-cell CLL/lymphoma 11A (zinc finger protein)	3.465	0	NM_001076121.1		SUPT3H	suppressor of Ty 3 homolog (S. cerevisiae)	3.885	0	NM_001105008.1		EXT1	exostosin 1	3.563	0	NM_001098095.1		STAG1	stromal antigen 1	2.684	0.012	XM_002685052.2		IKZF1	IKAROS family zinc finger 1 (Ikaros)	4.892	0	NM_001105257.1		C1H3orf70	chromosome 1 open reading frame, human C3orf70	4.016	0.006	NM_001195030.1
STIM1	stromal interaction molecule 1	3.556	0	NM_001035409.1		GBP5	guanylate binding protein 5	2.905	0	NM_001075746.1		TMEM163	transmembrane protein 163	3.461	0	NM_001101160.1		AMN1	antagonist of mitotic exit network 1 homolog (S. cerevisiae)	3.871	0	NM_001075858.2		RYBP	RING1 and YY1 binding protein	3.532	0	XM_002696972.2		PRKCB	protein kinase C, beta	2.676	0.012	NM_174587.1		ITGAL	integrin, alpha L (antigen CD11A (p180), lymphocyte function-associated antigen 1; alpha polypeptide)	4.892	0	NM_198221.2		ELMO1	engulfment and cell motility 1	3.983	0.016	NM_001113227.1
SLC30A7	solute carrier family 30 (zinc transporter), member 7	3.555	0	NM_001083760.1		USP18	ubiquitin specific peptidase 18	2.9	0	NM_001017940.1		CAMK2D	calcium/calmodulin-dependent protein kinase II delta	3.459	0	NM_001046333.1		MDM4	Mdm4 p53 binding protein homolog (mouse)	3.865	0	NM_001046169.1		ZEB1	zinc finger E-box binding homeobox 1	3.477	0	NM_001206590.1		STRBP	spermatid perinuclear RNA binding protein	2.636	0.014	NM_001075739.1		ITGB7	integrin, beta 7	4.892	0	NM_001105365.1		ARL15	ADP-ribosylation factor-like 15	3.941	0.008	NM_001014943.1
LOC537017	cytidine monophosphate-N-acetylneuraminic acid hydroxylase-like	3.543	0	XM_002697563.2		LOC516599	tripartite motif containing 5-like	2.897	0	XM_002693205.1		ZNRF2	zinc and ring finger 2	3.441	0	NM_001105443.1		TMEM163	transmembrane protein 163	3.85	0	NM_001101160.1		HDAC8	histone deacetylase 8	3.469	0	NM_001076231.1		SP140	SP140 nuclear body protein	2.611	0.016	NM_001075447.1		ITPKB	inositol-trisphosphate 3-kinase B	4.892	0	XM_002707735.1		EXOC4	exocyst complex component 4	3.922	0.008	NM_001102207.1
BACH2	BTB and CNC homology 1, basic leucine zipper transcription factor 2	3.523	0	XM_002690189.1		LOC508347	interferon-induced protein 44-like	2.816	0.001	XM_003585891.1		JARID2	jumonji, AT rich interactive domain 2	3.44	0	XM_002697579.2		SKAP1	src kinase associated phosphoprotein 1	3.833	0	XM_002695944.2		CAMK2D	calcium/calmodulin-dependent protein kinase II delta	3.448	0	NM_001046333.1		GMDS	GDP-mannose 4,6-dehydratase	2.587	0.017	NM_001080331.1		ITPR1	inositol 1,4,5-trisphosphate receptor, type 1	4.892	0	NM_174841.2		VPS13B	vacuolar protein sorting 13 homolog B (yeast)	3.912	0.008	XM_002692791.2
EIF4G3	eukaryotic translation initiation factor 4 gamma, 3	3.487	0.001	XM_003585797.1		CAMK2D	calcium/calmodulin-dependent protein kinase II delta	2.785	0.001	NM_001046333.1		FOXP1	forkhead box P1	3.438	0	NM_001083689.1		ELMO1	engulfment and cell motility 1	3.822	0	NM_001024505.2		GNL3L	guanine nucleotide binding protein-like 3 (nucleolar)-like	3.417	0	NM_001034307.1		KLHL2	kelch-like 2, Mayven (Drosophila)	2.565	0.018	NM_001102160.1		JARID2	jumonji, AT rich interactive domain 2	4.892	0	XM_002697579.2		ZNRF2	zinc and ring finger 2	3.91	0.008	NM_001105443.1
LOC782246	uncharacterized LOC782246	3.468	0	XM_003585759.1		CDH10	cadherin 10, type 2 (T2-cadherin)	2.768	0.001	NM_001076266.2		SETX	senataxin	3.432	0	XM_002691649.2		CDKAL1	CDK5 regulatory subunit associated protein 1-like 1	3.816	0	NM_001192691.1		ABCB7	ATP-binding cassette, sub-family B (MDR/TAP), member 7	3.404	0	NM_001192783.1		C1H3orf70	chromosome 1 open reading frame, human C3orf70	2.555	0.019	NM_001195030.1		KDM4A	lysine (K)-specific demethylase 4A	4.892	0	NM_001206316.1		GTDC1	glycosyltransferase-like domain containing 1	3.833	0.01	NM_001076035.1
AFF3	AF4/FMR2 family, member 3	3.463	0	XM_002691147.2		LOC786372	trichohyalin-like	2.761	0.001	XM_002686240.1		LRRC8D	leucine rich repeat containing 8 family, member D	3.403	0	NM_001083741.1		ZBTB20	zinc finger and BTB domain containing 20	3.813	0	XM_003585640.1		CDKAL1	CDK5 regulatory subunit associated protein 1-like 1	3.396	0	NM_001192691.1		NDUFA10	NADH dehydrogenase (ubiquinone) 1 alpha subcomplex, 10, 42kDa	2.542	0.02	NM_176655.2		KIAA0922	KIAA0922 ortholog	4.892	0	NM_001076803.1		UBE2K	ubiquitin-conjugating enzyme E2K	3.817	0.01	NM_174080.2
EXOC4	exocyst complex component 4	3.446	0	NM_001102207.1		LOC512486	interferon-induced guanylate-binding protein 1	2.666	0.002	NM_001244229.1		RYBP	RING1 and YY1 binding protein	3.403	0	XM_002696972.2		LOC782246	uncharacterized LOC782246	3.809	0	XM_003585759.1		GDA	guanine deaminase	3.392	0	NM_001192620.1		SLC30A7	solute carrier family 30 (zinc transporter), member 7	2.535	0.02	NM_001083760.1		LOC100299071	uncharacterized LOC100299071	4.892	0	XM_002694863.2		EIF4G3	eukaryotic translation initiation factor 4 gamma, 3	3.795	0.011	XM_003585795.1
PHF21A	PHD finger protein 21A	3.437	0	NM_001206197.1		LOC781710	interferon-induced guanylate-binding protein 1-like	2.662	0.002	XM_002686247.1		ITPR1	inositol 1,4,5-trisphosphate receptor, type 1	3.402	0	NM_174841.2		UTRN	utrophin	3.801	0	XM_002690294.2		LOC100848544	uncharacterized LOC100848544	3.372	0	XR_139291.1		RUNX1	runt-related transcription factor 1	2.533	0.02	XM_002685147.2		LOC100847940	uncharacterized LOC100847940	4.892	0	XR_139712.1		PLCL2	phospholipase C-like 2	3.795	0.011	NM_001192255.1
RALGPS2	Ral GEF with PH domain and SH3 binding motif 2	3.409	0	NM_001191426.1		ADAR	adenosine deaminase, RNA-specific	2.661	0.002	XM_002686013.2		EXOC4	exocyst complex component 4	3.386	0	NM_001102207.1		RYBP	RING1 and YY1 binding protein	3.781	0	XM_002696972.2		EIF4G3	eukaryotic translation initiation factor 4 gamma, 3	3.337	0.005	XM_003585797.1		MAN2A1	mannosidase, alpha, class 2A, member 1	2.526	0.02	NM_001205886.1		LOC100848544	uncharacterized LOC100848544	4.892	0	XR_139291.1		TBC1D5	TBC1 domain family, member 5	3.793	0.011	NM_001205489.1
CAMK2D	calcium/calmodulin-dependent protein kinase II delta	3.405	0	NM_001046333.1		XAF1	XIAP associated factor 1	2.659	0.002	NM_001035075.1		CDH10	cadherin 10, type 2 (T2-cadherin)	3.383	0	NM_001076266.2		CNOT4	CCR4-NOT transcription complex, subunit 4	3.68	0	NM_001035432.1		C26H10orf76	chromosome 26 open reading frame, human C10orf76	3.336	0	XM_002698448.1		TMEM163	transmembrane protein 163	2.518	0.021	NM_001101160.1		LOC509109	mitogen-activated protein kinase kinase kinase kinase 4	4.892	0	XM_003586614.1		ABCB7	ATP-binding cassette, sub-family B (MDR/TAP), member 7	3.777	0.011	NM_001192783.1
SLC4A7	solute carrier family 4, sodium bicarbonate cotransporter, member 7	3.396	0	NM_001098926.2		STAT1	signal transducer and activator of transcription 1, 91kDa	2.614	0.003	NM_001077900.1		MICU1	mitochondrial calcium uptake 1	3.38	0	NM_001075338.1		RBM41	RNA binding motif protein 41	3.665	0	XM_002699883.2		COMMD1	copper metabolism (Murr1) domain containing 1	3.334	0	NM_001046384.1		TUBGCP5	tubulin, gamma complex associated protein 5	2.515	0.021	NM_001102495.1		LOC782246	uncharacterized LOC782246	4.892	0	XM_003585759.1		BCAS3	breast carcinoma amplified sequence 3	3.771	0.011	XM_002695612.2
TMEM163	transmembrane protein 163	3.383	0	NM_001101160.1		GTDC1	glycosyltransferase-like domain containing 1	2.604	0.003	NM_001076035.1		SIK3	SIK family kinase 3	3.364	0	XM_002693024.2		UBE2K	ubiquitin-conjugating enzyme E2K	3.663	0	NM_174080.2		DDX10	DEAD (Asp-Glu-Ala-Asp) box polypeptide 10	3.333	0	NM_001076881.1		LOC535946	KAT8 regulatory NSL complex subunit 1	2.512	0.021	XM_003587457.1		LOC786649	RAP1 GTPase activating protein 2	4.892	0	XM_003587395.1		GNG2	guanine nucleotide binding protein (G protein), gamma 2	3.757	0.011	NM_174072.3
EIF4G3	eukaryotic translation initiation factor 4 gamma, 3	3.38	0	XM_003585796.1		RAB3IP	RAB3A interacting protein (rabin3)	2.594	0.003	NM_001046347.1		NAV3	neuron navigator 3	3.356	0	NM_001192669.2		BCAS3	breast carcinoma amplified sequence 3	3.651	0	XM_002695612.2		PRIM2	primase, DNA, polypeptide 2 (58kDa)	3.328	0	NM_001079594.1		SLC4A7	solute carrier family 4, sodium bicarbonate cotransporter, member 7	2.498	0.022	NM_001098926.2		LSP1	lymphocyte-specific protein 1	4.892	0	NM_001075374.1		GNL3L	guanine nucleotide binding protein-like 3 (nucleolar)-like	3.752	0.011	NM_001034307.1
RHOH	ras homolog gene family, member H	3.362	0	NM_001078124.1		CDK19	cyclin-dependent kinase 19	2.581	0.003	NM_001205707.1		ZFAND3	zinc finger, AN1-type domain 3	3.347	0	NM_001102145.1		LOC781036	DnaJ (Hsp40) homolog, subfamily C, member 1	3.645	0	XM_003586766.1		PIK3R3	phosphoinositide-3-kinase, regulatory subunit 3 (gamma)	3.305	0	NM_174796.1		ARL15	ADP-ribosylation factor-like 15	2.491	0.022	NM_001014943.1		MARK2	MAP/microtubule affinity-regulating kinase 2	4.892	0	NM_001102182.1		PDGFD	platelet derived growth factor D	3.747	0.011	NM_001083706.1
ZNRF2	zinc and ring finger 2	3.337	0	NM_001105443.1		LOC781036	DnaJ (Hsp40) homolog, subfamily C, member 1	2.578	0.004	XM_003586766.1		SLC2A13	solute carrier family 2 (facilitated glucose transporter), member 13	3.343	0	NM_001192963.1		RPS6KA6	ribosomal protein S6 kinase, 90kDa, polypeptide 6	3.615	0	NM_001205926.1		PHF21A	PHD finger protein 21A	3.288	0	NM_001206197.1		ZCCHC7	zinc finger, CCHC domain containing 7	2.484	0.023	NM_001046100.1		MED27	mediator complex subunit 27	4.892	0	NM_001040546.1		SP140	SP140 nuclear body protein	3.73	0.012	NM_001075447.1
LPP	LIM domain containing preferred translocation partner in lipoma	3.336	0	NM_001192591.1		KYNU	kynureninase	2.574	0.004	NM_001191308.1		EIF4G3	eukaryotic translation initiation factor 4 gamma, 3	3.339	0	XM_003585795.1		MACF1	microtubule-actin crosslinking factor 1	3.614	0	NM_001143860.1		KLF8	Kruppel-like factor 8	3.268	0	XM_002700142.1		UBE2K	ubiquitin-conjugating enzyme E2K	2.481	0.023	NM_174080.2		MSI2	musashi homolog 2 (Drosophila)	4.892	0	NM_001206656.1		LRRC8D	leucine rich repeat containing 8 family, member D	3.701	0.012	NM_001083741.1
EXT1	exostosin 1	3.33	0	NM_001098095.1		RYBP	RING1 and YY1 binding protein	2.574	0.004	XM_002696972.2		LRCH1	leucine-rich repeats and calponin homology (CH) domain containing 1	3.325	0	XM_002691830.1		HDAC8	histone deacetylase 8	3.606	0	NM_001076231.1		OPHN1	oligophrenin-1-like	3.256	0	XM_002700049.1		TBC1D5	TBC1 domain family, member 5	2.48	0.023	NM_001205489.1		NUP210	nucleoporin 210kDa	4.892	0	NM_001191461.1		DIP2B	DIP2 disco-interacting protein 2 homolog B (Drosophila)	3.693	0.012	NM_001192309.1
LOC535946	KAT8 regulatory NSL complex subunit 1	3.311	0	XM_003587457.1		SPTLC2	serine palmitoyltransferase, long chain base subunit 2	2.568	0.004	NM_001099081.1		MGAT4A	mannosyl (alpha-1,3-)-glycoprotein beta-1,4-N-acetylglucosaminyltransferase, isozyme A	3.316	0	NM_177520.2		ZCCHC7	zinc finger, CCHC domain containing 7	3.605	0	NM_001046100.1		MGAT4A	mannosyl (alpha-1,3-)-glycoprotein beta-1,4-N-acetylglucosaminyltransferase, isozyme A	3.254	0	NM_177520.2		TCF12	transcription factor 12	2.479	0.023	NM_001077885.1		PACS1	phosphofurin acidic cluster sorting protein 1	4.892	0	NM_001143870.1		LOC100296943	uncharacterized LOC100296943	3.692	0.012	XM_002690187.1
EIF4G3	eukaryotic translation initiation factor 4 gamma, 3	3.306	0	XM_003585795.1		TRIM34	tripartite motif containing 34	2.533	0.005	NM_001046461.1		LOC782246	uncharacterized LOC782246	3.291	0	XM_003585759.1		ZBTB20	zinc finger and BTB domain containing 20	3.6	0	XM_003585639.1		DYM	dymeclin	3.244	0	NM_001192999.1		RRAS2	related RAS viral (r-ras) oncogene homolog 2	2.475	0.023	NM_001099010.1		PLCL2	phospholipase C-like 2	4.892	0	NM_001192255.1		AFF3	AF4/FMR2 family, member 3	3.685	0.013	XM_002691147.2
ZBTB20	zinc finger and BTB domain containing 20	3.3	0	XM_003585639.1		EIF4G3	eukaryotic translation initiation factor 4 gamma, 3	2.53	0.018	XM_003585797.1		BCAS3	breast carcinoma amplified sequence 3	3.249	0	XM_002695612.2		ACAP2	ArfGAP with coiled-coil, ankyrin repeat and PH domains 2	3.591	0	NM_001105337.1		ZNRF2	zinc and ring finger 2	3.239	0	NM_001105443.1		ZEB2	zinc finger E-box binding homeobox 2	2.472	0.023	NM_001076192.1		PLEKHA2	pleckstrin homology domain containing, family A (phosphoinositide binding specific) member 2	4.892	0	NM_001035383.1		TCF12	transcription factor 12	3.685	0.013	NM_001077885.1
TLE4	transducin-like enhancer of split 4 (E(sp1) homolog, Drosophila)	3.297	0	NM_001081583.1		TMEM131	transmembrane protein 131	2.521	0.005	XM_002691141.2		SLC25A26	solute carrier family 25 (S-adenosylmethionine carrier), member 26	3.244	0	XM_003587627.1		LSP1	lymphocyte-specific protein 1	3.585	0	NM_001075374.1		UST	uronyl-2-sulfotransferase	3.238	0	NM_001206826.1		CAMK1D	calcium/calmodulin-dependent protein kinase ID	2.459	0.025	XM_002692061.2		PPP1R12B	protein phosphatase 1, regulatory subunit 12B	4.892	0	XM_003587116.1-2		HDAC8	histone deacetylase 8	3.681	0.013	NM_001076231.1
AMBRA1	autophagy/beclin-1 regulator 1	3.287	0.001	XM_003587010.1		IL7	interleukin 7	2.507	0.005	NM_173924.2		GNL3L	guanine nucleotide binding protein-like 3 (nucleolar)-like	3.224	0	NM_001034307.1		KLHL2	kelch-like 2, Mayven (Drosophila)	3.583	0	NM_001102160.1		ZEB2	zinc finger E-box binding homeobox 2	3.237	0	NM_001076192.1		PAPD4	PAP associated domain containing 4	2.454	0.025	NM_001046361.1		PRKCB	protein kinase C, beta	4.892	0	NM_174587.1		UVRAG	UV radiation resistance associated gene	3.676	0.013	NM_001193026.1
MDM4	Mdm4 p53 binding protein homolog (mouse)	3.287	0.001	NM_001046169.1		ITGA4	integrin, alpha 4 (antigen CD49D, alpha 4 subunit of VLA-4 receptor)	2.494	0.006	NM_174748.1		CHM	choroideremia (Rab escort protein 1)	3.222	0	NM_001205389.1		LPP	LIM domain containing preferred translocation partner in lipoma	3.57	0	NM_001192591.1		CDK19	cyclin-dependent kinase 19	3.231	0	NM_001205707.1		EIF4G3	eukaryotic translation initiation factor 4 gamma, 3	2.446	0.026	XM_003585795.1		PRKCE	protein kinase C, epsilon	4.892	0	NM_001111120.1		ACAP2	ArfGAP with coiled-coil, ankyrin repeat and PH domains 2	3.653	0.013	NM_001105337.1
MGAT4A	mannosyl (alpha-1,3-)-glycoprotein beta-1,4-N-acetylglucosaminyltransferase, isozyme A	3.279	0.001	NM_177520.2		NAMPT	nicotinamide phosphoribosyltransferase	2.486	0.006	NM_001244141.1		TCF4	transcription factor 4	3.181	0	NM_001034621.1		PBX3	pre-B-cell leukemia homeobox 3	3.569	0	NM_001046453.1		GPHN	gephyrin	3.229	0	XM_003586590.1		AFF3	AF4/FMR2 family, member 3	2.398	0.032	XM_002691147.2		PRRC2B	proline-rich coiled-coil 2B	4.892	0	XM_002691647.2		MAML3	mastermind-like 3 (Drosophila)	3.636	0.014	XM_003587128.1
GTDC1	glycosyltransferase-like domain containing 1	3.264	0.001	NM_001076035.1		ZCCHC7	zinc finger, CCHC domain containing 7	2.483	0.006	NM_001046100.1		EAF2	ELL associated factor 2	3.159	0	NM_001046507.1		SMYD3	SET and MYND domain containing 3	3.56	0	NM_001076406.1		PBX3	pre-B-cell leukemia homeobox 3	3.198	0	NM_001046453.1		MDM4	Mdm4 p53 binding protein homolog (mouse)	2.377	0.035	NM_001046169.1		RALY	RNA binding protein, autoantigenic (hnRNP-associated with lethal yellow homolog (mouse))	4.892	0	NM_001014847.1		BACH2	BTB and CNC homology 1, basic leucine zipper transcription factor 2	3.633	0.014	XM_002690189.1
TCF12	transcription factor 12	3.262	0.001	NM_001077885.1		EIF4G3	eukaryotic translation initiation factor 4 gamma, 3	2.476	0.006	XM_003585795.1		ITGA4	integrin, alpha 4 (antigen CD49D, alpha 4 subunit of VLA-4 receptor)	3.142	0	NM_174748.1		ARID2	AT rich interactive domain 2 (ARID, RFX-like)	3.547	0	XM_002687323.2		MICU1	mitochondrial calcium uptake 1	3.174	0	NM_001075338.1		FOXP1	forkhead box P1	2.371	0.036	NM_001083689.1		RAPGEF1	Rap guanine nucleotide exchange factor (GEF) 1	4.892	0	NM_001205872.1		FCHSD2	FCH and double SH3 domains 2	3.624	0.014	XM_002693439.2
FCHSD2	FCH and double SH3 domains 2	3.239	0.001	XM_002693439.2		TRANK1	tetratricopeptide repeat and ankyrin repeat containing 1	2.472	0.006	XM_002696940.1		ARHGAP17	Rho GTPase activating protein 17	3.12	0	XM_002698028.2		TUBGCP5	tubulin, gamma complex associated protein 5	3.545	0	NM_001102495.1		LPP	LIM domain containing preferred translocation partner in lipoma	3.143	0	NM_001192591.1		HDAC8	histone deacetylase 8	2.371	0.036	NM_001076231.1		RCSD1	RCSD domain containing 1	4.892	0	NM_001034418.1		PAN3	PAN3 poly(A) specific ribonuclease subunit homolog (S. cerevisiae)	3.624	0.014	XM_003586703.1
ASXL1	additional sex combs like 1 (Drosophila)	3.201	0.001	XM_002692288.1		CNOT4	CCR4-NOT transcription complex, subunit 4	2.466	0.007	NM_001035432.1		GTDC1	glycosyltransferase-like domain containing 1	3.116	0	NM_001076035.1		SLC4A7	solute carrier family 4, sodium bicarbonate cotransporter, member 7	3.54	0	NM_001098926.2		SCFD2	sec1 family domain containing 2	3.142	0	NM_001078005.1		SLC25A26	solute carrier family 25 (S-adenosylmethionine carrier), member 26	2.368	0.037	XM_003587627.1		RERE	arginine-glutamic acid dipeptide (RE) repeats	4.892	0	XM_002694049.1		PRKCB	protein kinase C, beta	3.622	0.014	NM_174587.1
UBE2K	ubiquitin-conjugating enzyme E2K	3.2	0.001	NM_174080.2		MACF1	microtubule-actin crosslinking factor 1	2.452	0.007	NM_001143860.1		IL7	interleukin 7	3.116	0	NM_173924.2		EML4	echinoderm microtubule associated protein like 4	3.498	0	NM_001193054.1		UBE2K	ubiquitin-conjugating enzyme E2K	3.14	0	NM_174080.2		BCL11A	B-cell CLL/lymphoma 11A (zinc finger protein)	2.365	0.037	NM_001076121.1		RFTN1	raftlin, lipid raft linker 1	4.892	0	XM_002685189.1		MAN2A1	mannosidase, alpha, class 2A, member 1	3.621	0.014	NM_001205886.1
WAC	WW domain containing adaptor with coiled-coil	3.192	0.001	XM_002692128.2		ARID5B	AT rich interactive domain 5B (MRF1-like)	2.431	0.008	XM_002698842.2		ZCCHC7	zinc finger, CCHC domain containing 7	3.096	0	NM_001046100.1		RRAS2	related RAS viral (r-ras) oncogene homolog 2	3.493	0	NM_001099010.1		COA5	cytochrome c oxidase assembly factor 5	3.135	0	NM_001195024.1		VPS13B	vacuolar protein sorting 13 homolog B (yeast)	2.359	0.038	XM_002692791.2		RUNX1	runt-related transcription factor 1	4.892	0	XM_002685147.2		STRBP	spermatid perinuclear RNA binding protein	3.619	0.014	NM_001075739.1
ZNRF1	zinc and ring finger 1	3.186	0.001	NM_001192210.1		LOC100848038	uncharacterized LOC100848038	2.426	0.008	XM_003586278.1		PHF21A	PHD finger protein 21A	3.094	0	NM_001206197.1		SLC2A13	solute carrier family 2 (facilitated glucose transporter), member 13	3.488	0	NM_001192963.1		UST	uronyl-2-sulfotransferase	3.133	0	NM_001206827.1		RSBN1L	round spermatid basic protein 1-like	2.354	0.039	XM_002686750.1		RXRA	retinoid X receptor, alpha	4.892	0	XM_002691687.2		MDM4	Mdm4 p53 binding protein homolog (mouse)	3.618	0.014	NM_001046169.1
LOC787099	zinc finger, CCHC domain containing 2	3.181	0.001	XM_003587776.1		MX1	myxovirus (influenza virus) resistance 1, interferon-inducible protein p78 (mouse)	2.416	0.008	NM_173940.2		RRAS2	related RAS viral (r-ras) oncogene homolog 2	3.086	0	NM_001099010.1		COMMD1	copper metabolism (Murr1) domain containing 1	3.483	0	NM_001046384.1		RPS6KA6	ribosomal protein S6 kinase, 90kDa, polypeptide 6	3.132	0	NM_001205926.1		ETV6	ets variant 6	2.344	0.04	NM_001015514.2		SEPT-9	septin 9	4.892	0	XM_002696201.2		SUPT3H	suppressor of Ty 3 homolog (S. cerevisiae)	3.609	0.015	NM_001105008.1
STRBP	spermatid perinuclear RNA binding protein	3.149	0.001	NM_001075739.1		TPC3	two pore channel 3	2.416	0.008	NM_001161651.1		EIF4G3	eukaryotic translation initiation factor 4 gamma, 3	3.085	0	XM_003585796.1		EXT1	exostosin 1	3.481	0	NM_001098095.1		ITGA4	integrin, alpha 4 (antigen CD49D, alpha 4 subunit of VLA-4 receptor)	3.122	0	NM_174748.1		PACS1	phosphofurin acidic cluster sorting protein 1	2.339	0.041	NM_001143870.1		SIK3	SIK family kinase 3	4.892	0	XM_002693024.2		PBX3	pre-B-cell leukemia homeobox 3	3.593	0.015	NM_001046453.1
KCNQ5	potassium voltage-gated channel, KQT-like subfamily, member 5	3.146	0.001	XM_002690016.2		MDM4	Mdm4 p53 binding protein homolog (mouse)	2.406	0.009	NM_001046169.1		SP140	SP140 nuclear body protein	3.082	0	NM_001075447.1		SRBD1	S1 RNA binding domain 1	3.459	0	NM_001205772.1		PACS1	phosphofurin acidic cluster sorting protein 1	3.108	0	NM_001143870.1		RALGPS2	Ral GEF with PH domain and SH3 binding motif 2	2.335	0.042	NM_001191426.1		SMAD3	SMAD family member 3	4.892	0	NM_001205805.1		LOC535946	KAT8 regulatory NSL complex subunit 1	3.584	0.016	XM_003587457.1
EPSTI1	epithelial stromal interaction 1 (breast)	3.141	0.001	XM_002691774.1		TUBGCP5	tubulin, gamma complex associated protein 5	2.401	0.009	NM_001102495.1		PRKCB	protein kinase C, beta	3.045	0	NM_174587.1		LCLAT1	lysocardiolipin acyltransferase 1	3.442	0	XM_002691445.1		LOC100137763	uncharacterized LOC100137763	3.067	0	XM_002686687.1		CDH10	cadherin 10, type 2 (T2-cadherin)	2.328	0.043	NM_001076266.2		SNX29	sorting nexin 29	4.892	0	NM_001076862.1		LOC100848671	uncharacterized LOC100848671	3.58	0.016	XM_003586038.1
MBNL1	muscleblind-like splicing regulator 1	3.141	0.001	XM_002691775.2		C5H12orf35	chromosome 5 open reading frame, human C12orf35	2.397	0.009	NM_001101072.1		ADRBK2	adrenergic, beta, receptor kinase 2	3.042	0	NM_174500.2		TBC1D5	TBC1 domain family, member 5	3.439	0	NM_001205489.1		LOC100849042	phosphodiesterase 7A	3.061	0	XM_003586888.1		NSMCE2	non-SMC element 2, MMS21 homolog (S. cerevisiae)	2.326	0.043	NM_001075797.1		SRRM2	serine/arginine repetitive matrix 2	4.892	0	XM_002697930.2		ELMO1	engulfment and cell motility 1	3.573	0.007	NM_001024505.2
EIF4G3	eukaryotic translation initiation factor 4 gamma, 3	3.133	0	NM_001099725.1		GIMAP8	GTPase, IMAP family member 8	2.388	0.01	XM_002687147.2		PACS1	phosphofurin acidic cluster sorting protein 1	3.024	0	NM_001143870.1		PDGFD	platelet derived growth factor D	3.438	0	NM_001083706.1		TBC1D5	TBC1 domain family, member 5	3.057	0	NM_001205489.1		PFDN1	prefoldin subunit 1	2.317	0.044	NM_001078062.1		SYN1	synapsin I	4.892	0	XM_003588170.1-2		LOC100848544	uncharacterized LOC100848544	3.568	0.016	XR_139291.1
UTRN	utrophin	3.117	0.001	XM_003585794.1		DDX58	DEAD (Asp-Glu-Ala-Asp) box polypeptide 58	2.386	0.01	XM_002689480.2		MAN2A1	mannosidase, alpha, class 2A, member 1	3.017	0	NM_001205886.1		SPG11	spastic paraplegia 11 (autosomal recessive)	3.436	0	XM_002691092.1		HS6ST2	heparan sulfate 6-O-sulfotransferase 2	3.054	0	NM_001206635.1		DIP2B	DIP2 disco-interacting protein 2 homolog B (Drosophila)	2.315	0.045	NM_001192309.1		TMEM163	transmembrane protein 163	4.892	0	NM_001101160.1		TUBGCP5	tubulin, gamma complex associated protein 5	3.562	0.016	NM_001102495.1
ELMO1	engulfment and cell motility 1	3.114	0.008	XM_002690294.2		LOC511982	solute carrier family 7 (cationic amino acid transporter, y+ system), member 3-like	2.382	0.01	XR_139582.1		TBC1D5	TBC1 domain family, member 5	3.009	0	NM_001205489.1		EIF4G3	eukaryotic translation initiation factor 4 gamma, 3	3.422	0.001	XM_003585797.1		EXOC6B	exocyst complex component 6B	3.044	0	NM_001076416.1		FAM107B	family with sequence similarity 107, member B	2.284	0.05	NM_001046393.1		TMEM164	transmembrane protein 164	4.892	0	NM_001031762.1		MACF1	microtubule-actin crosslinking factor 1	3.559	0.016	NM_001143860.1
IMPG2	interphotoreceptor matrix proteoglycan 2	3.111	0.001	NM_001113227.1		AKAP7	A kinase (PRKA) anchor protein 7	2.368	0.011	NM_001102266.1		SPTLC2	serine palmitoyltransferase, long chain base subunit 2	2.995	0	NM_001099081.1		CSNK1G1	casein kinase 1, gamma 1	3.418	0	NM_001038146.1		RRAS2	related RAS viral (r-ras) oncogene homolog 2	3.032	0	NM_001099010.1		ELMO1	engulfment and cell motility 1	2.254	0.011	NM_001024505.2		TNRC6B	trinucleotide repeat containing 6B	4.892	0	NM_001192655.1		ZCCHC7	zinc finger, CCHC domain containing 7	3.554	0.017	NM_001046100.1
ITGA4	integrin, alpha 4 (antigen CD49D, alpha 4 subunit of VLA-4 receptor)	3.099	0.001	XM_002684719.2		GNL3L	guanine nucleotide binding protein-like 3 (nucleolar)-like	2.363	0.011	NM_001034307.1		C26H10orf76	chromosome 26 open reading frame, human C10orf76	2.976	0	XM_002698448.1		STRBP	spermatid perinuclear RNA binding protein	3.406	0	NM_001075739.1		TIPRL	TIP41, TOR signaling pathway regulator-like (S. cerevisiae)	3.032	0	NM_001079615.1		TNFSF14	tumor necrosis factor (ligand) superfamily, member 14	-2.29	0.049	NM_001101855.1		WDR20	WD repeat domain 20	4.892	0	NM_001191156.1		ITFG1	integrin alpha FG-GAP repeat containing 1	3.529	0.018	NM_001038532.1
LOC100849042	phosphodiesterase 7A	3.081	0.001	NM_174748.1		ZFAND3	zinc finger, AN1-type domain 3	2.351	0.012	NM_001102145.1		RASAL2	RAS protein activator like 2	2.972	0	XM_002694157.2		ZNF609	zinc finger protein 609	3.4	0	NM_001193023.1		FCHSD2	FCH and double SH3 domains 2	3.031	0	XM_002693439.2		GRK6	G protein-coupled receptor kinase 6	-2.293	0.048	NM_001191530.1		WWOX	WW domain containing oxidoreductase	4.892	0	NM_001078092.1		MARK3	MAP/microtubule affinity-regulating kinase 3	3.503	0.019	XM_002696784.2
ANGPTL1	angiopoietin-like 1	3.079	0.001	XM_003586888.1		SULT6B1	sulfotransferase family, cytosolic, 6B, member 1	2.341	0.012	XM_002691343.2		LOC100296620	uncharacterized LOC100296620	2.971	0	XM_002684648.2		ABCB7	ATP-binding cassette, sub-family B (MDR/TAP), member 7	3.396	0	NM_001192783.1		RERE	arginine-glutamic acid dipeptide (RE) repeats	3.021	0	XM_002694049.1		GRK6	G protein-coupled receptor kinase 6	-2.293	0.048	NM_001205390.1		XYLT1	xylosyltransferase I	4.892	0	XM_002698037.1		CDK19	cyclin-dependent kinase 19	3.482	0.02	NM_001205707.1
KLHL2	kelch-like 2, Mayven (Drosophila)	3.078	0.001	NM_001075426.1		FCRL3	Fc receptor-like 3	2.34	0.012	XM_002685955.1		EIF4G3	eukaryotic translation initiation factor 4 gamma, 3	2.967	0	XM_003585794.1		ZZZ3	zinc finger, ZZ-type containing 3	3.396	0	NM_001102215.1		CSNK1G1	casein kinase 1, gamma 1	3.02	0	NM_001038146.1		SUN2	Sad1 and UNC84 domain containing 2	-2.35	0.039	NM_001102319.1		ZFAND3	zinc finger, AN1-type domain 3	4.892	0	NM_001102145.1		CDC14A	cell division cycle 14A	3.479	0.021	XM_003585862.1
DCUN1D1	DCN1, defective in cullin neddylation 1, domain containing 1 (S. cerevisiae)	3.069	0.001	NM_001102160.1		TMEM163	transmembrane protein 163	2.328	0.013	NM_001101160.1		SMURF1	SMAD specific E3 ubiquitin protein ligase 1	2.965	0	XM_002698145.2		MKLN1	muskelin 1, intracellular mediator containing kelch motifs	3.394	0.003	NM_001097999.1-2		LOC783300	uncharacterized LOC783300	3.015	0	XM_002699990.1		CNPPD1	cyclin Pas1/PHO80 domain containing 1	-2.363	0.037	NM_001015538.1		ADD1	adducin 1 (alpha)	4.891	0	NM_001205999.1		FOXP1	forkhead box P1	3.47	0.02	NM_001083689.1
MARK3	MAP/microtubule affinity-regulating kinase 3	3.069	0.001	NM_001102233.1		USP34	ubiquitin specific peptidase 34	2.319	0.014	XM_002691422.2		CR2	complement component (3d/Epstein Barr virus) receptor 2	2.961	0	NM_001198991.1		ITFG1	integrin alpha FG-GAP repeat containing 1	3.385	0	NM_001038532.1		ELMO1	engulfment and cell motility 1	2.988	0.001	NM_001113227.1		LOC100847354	uncharacterized LOC100847354	-2.37	0.036	XM_003587372.1		GMDS	GDP-mannose 4,6-dehydratase	4.86	0	NM_001080331.1		NFYC	nuclear transcription factor Y, gamma	3.466	0.02	NM_001034598.1
ZNF407	zinc finger protein 407	3.064	0.001	XM_002696784.2		EIF2AK2	eukaryotic translation initiation factor 2-alpha kinase 2	2.309	0.015	NM_178109.2		RASAL2	RAS protein activator like 2	2.952	0	XM_003587091.1		DOCK11	dedicator of cytokinesis 11	3.378	0	XM_002699465.1-1		CDC14A	cell division cycle 14A	2.987	0.001	XM_002686168.1		LFNG	LFNG O-fucosylpeptide 3-beta-N-acetylglucosaminyltransferase	-2.48	0.023	NM_001046222.1		CARD11	caspase recruitment domain family, member 11	4.821	0	NM_001109796.1		ZBTB20	zinc finger and BTB domain containing 20	3.46	0.021	XM_003585640.1
SMYD3	SET and MYND domain containing 3	3.063	0.001	XM_002697658.1		ETV6	ets variant 6	2.285	0.016	NM_001015514.2		BACH2	BTB and CNC homology 1, basic leucine zipper transcription factor 2	2.95	0	XM_002690189.1		VPS13B	vacuolar protein sorting 13 homolog B (yeast)	3.37	0	XM_002692791.2		LOC100847919	uncharacterized LOC100847919	2.981	0	XM_003586484.1		MYH9	myosin, heavy chain 9, non-muscle	-2.487	0.022	NM_001192762.1		MGAT4A	mannosyl (alpha-1,3-)-glycoprotein beta-1,4-N-acetylglucosaminyltransferase, isozyme A	4.806	0	NM_177520.2		ARID2	AT rich interactive domain 2 (ARID, RFX-like)	3.449	0.021	XM_002687323.2
ARL15	ADP-ribosylation factor-like 15	3.06	0.001	NM_001076406.1		SLC25A26	solute carrier family 25 (S-adenosylmethionine carrier), member 26	2.274	0.017	XM_003587627.1		PLCL2	phospholipase C-like 2	2.941	0	NM_001192255.1		GNL3L	guanine nucleotide binding protein-like 3 (nucleolar)-like	3.362	0	NM_001034307.1		ARID2	AT rich interactive domain 2 (ARID, RFX-like)	2.978	0	XM_002687323.2		EIF4B	eukaryotic translation initiation factor 4B	-2.521	0.021	NM_001035028.1		ZNRF1	zinc and ring finger 1	4.792	0	NM_001192210.1		COMMD1	copper metabolism (Murr1) domain containing 1	3.446	0.021	NM_001046384.1
PBX3	pre-B-cell leukemia homeobox 3	3.054	0.001	NM_001014943.1		HERC6	hect domain and RLD 6	2.271	0.017	NM_001192644.1		RALY	RNA binding protein, autoantigenic (hnRNP-associated with lethal yellow homolog (mouse))	2.935	0	NM_001014847.1		TTC17	tetratricopeptide repeat domain 17	3.352	0	NM_001205309.1		STK3	serine/threonine kinase 3	2.978	0	NM_001079607.1		PABPC1	poly(A) binding protein, cytoplasmic 1	-2.548	0.019	NM_174568.2		LOC535946	KAT8 regulatory NSL complex subunit 1	4.791	0	XM_003587457.1		CDC14A	cell division cycle 14A	3.443	0.02	XM_002686168.1
TOX	thymocyte selection-associated high mobility group box	3.05	0.002	NM_001046453.1		MEF2A	myocyte enhancer factor 2A	2.271	0.017	NM_001083638.1		GALNT10	UDP-N-acetyl-alpha-D-galactosamine:polypeptide N-acetylgalactosaminyltransferase 10 (GalNAc-T10)	2.933	0	XM_002689328.1		ATRN	attractin	3.339	0	NM_173995.2		LOC100337090	ankyrin repeat domain 26-like	2.972	0	XR_139446.1								MAML3	mastermind-like 3 (Drosophila)	4.781	0	XM_003587128.1		NFATC3	nuclear factor of activated T-cells, cytoplasmic, calcineurin-dependent 3	3.439	0.022	NM_001192831.1
GNL3L	guanine nucleotide binding protein-like 3 (nucleolar)-like	3.043	0.002	NM_001102096.1		EIF4G3	eukaryotic translation initiation factor 4 gamma, 3	2.267	0.005	XM_003585794.1		ATRN	attractin	2.931	0	NM_173995.2		RALGPS2	Ral GEF with PH domain and SH3 binding motif 2	3.335	0	NM_001191426.1		MKLN1	muskelin 1, intracellular mediator containing kelch motifs	2.972	0.026	NM_001097999.1-2								AFF3	AF4/FMR2 family, member 3	4.743	0	XM_002691147.2		MEF2A	myocyte enhancer factor 2A	3.432	0.022	NM_001083638.1
LOC100336707	nuclear receptor binding SET domain protein 1-like	3.03	0.002	NM_001034307.1		NAF1	nuclear assembly factor 1 homolog (S. cerevisiae)	2.26	0.018	XM_003586172.1		STAG1	stromal antigen 1	2.92	0	XM_002685052.2		NFYC	nuclear transcription factor Y, gamma	3.317	0	NM_001034598.1		MAN2A1	mannosidase, alpha, class 2A, member 1	2.971	0	NM_001205886.1								MARK3	MAP/microtubule affinity-regulating kinase 3	4.741	0	XM_002696784.2		DOCK11	dedicator of cytokinesis 11	3.429	0.022	XM_002699465.1-1
DOCK11	dedicator of cytokinesis 11	3.026	0.002	XM_002689017.2		EIF4G3	eukaryotic translation initiation factor 4 gamma, 3	2.253	0.019	XM_003585796.1		UBE2K	ubiquitin-conjugating enzyme E2K	2.92	0	NM_174080.2		CDC14A	cell division cycle 14A	3.316	0	XM_003585862.1		TCF12	transcription factor 12	2.968	0	NM_001077885.1								FOXP1	forkhead box P1	4.716	0	NM_001083689.1		LOC100336707	nuclear receptor binding SET domain protein 1-like	3.421	0.022	XM_002689017.2
MYCBP2	MYC binding protein 2	3.021	0.002	XM_002699465.1-1		TCF4	transcription factor 4	2.252	0.019	NM_001034621.1		TBC1D1	TBC1 (tre-2/USP6, BUB2, cdc16) domain family, member 1	2.916	0	NM_001166524.1		RSRC1	arginine/serine-rich coiled-coil 1	3.31	0	NM_001075404.1		BCAS3	breast carcinoma amplified sequence 3	2.962	0	XM_002695612.2								OXNAD1	oxidoreductase NAD-binding domain containing 1	4.71	0	NM_001035090.1		ZBTB20	zinc finger and BTB domain containing 20	3.399	0.023	XM_003585639.1
ABCB7	ATP-binding cassette, sub-family B (MDR/TAP), member 7	3.009	0.002	NM_001192817.1		EXOC4	exocyst complex component 4	2.245	0.019	NM_001102207.1		EXT1	exostosin 1	2.913	0	NM_001098095.1		SLC25A26	solute carrier family 25 (S-adenosylmethionine carrier), member 26	3.309	0	XM_003587627.1		MEF2A	myocyte enhancer factor 2A	2.958	0	NM_001083638.1								LRRC8D	leucine rich repeat containing 8 family, member D	4.69	0	NM_001083741.1		FCRL1	Fc receptor-like 1	3.385	0.024	NM_001102045.1
DOCK10	dedicator of cytokinesis 10	2.996	0.002	NM_001192783.1		MYCBP2	MYC binding protein 2	2.245	0.019	NM_001192817.1		C6H4orf34	small integral membrane protein 14	2.91	0	NM_001046543.1		LRRC8D	leucine rich repeat containing 8 family, member D	3.307	0	NM_001083741.1		DOCK4	dedicator of cytokinesis 4	2.957	0	XM_002686809.2								XPO6	exportin 6	4.671	0	XM_002698080.2		RUNX1	runt-related transcription factor 1	3.377	0.024	XM_002685147.2
PACS1	phosphofurin acidic cluster sorting protein 1	2.996	0.002	NM_001191273.2		ALOX15	arachidonate 15-lipoxygenase	-2.254	0.019	NM_174501.2		CD38	CD38 molecule	2.91	0	NM_175798.3		PPP2R5E	protein phosphatase 2, regulatory subunit B', epsilon isoform	3.304	0	NM_001083468.1		LRRC8D	leucine rich repeat containing 8 family, member D	2.957	0	NM_001083741.1								PTK2B	PTK2B protein tyrosine kinase 2 beta	4.651	0	NM_001102252.1-2		RALY	RNA binding protein, autoantigenic (hnRNP-associated with lethal yellow homolog (mouse))	3.376	0.024	NM_001014847.1
MAML3	mastermind-like 3 (Drosophila)	2.993	0.002	NM_001143870.1		SLC16A7	solute carrier family 16, member 7 (monocarboxylic acid transporter 2)	-2.261	0.018	NM_001076336.2		MACF1	microtubule-actin crosslinking factor 1	2.909	0	NM_001143860.1		KLF8	Kruppel-like factor 8	3.296	0	XM_002700142.1		TUBGCP5	tubulin, gamma complex associated protein 5	2.942	0	NM_001102495.1								KIF21B	kinesin family member 21B	4.64	0	XM_002694241.2		EIF4G3	eukaryotic translation initiation factor 4 gamma, 3	3.375	0.025	XM_003585796.1
AMN1	antagonist of mitotic exit network 1 homolog (S. cerevisiae)	2.991	0.002	XM_003587128.1		PCSK6	proprotein convertase subtilisin/kexin type 6	-2.265	0.018	XM_002696654.2		ARID5B	AT rich interactive domain 5B (MRF1-like)	2.908	0	XM_002698842.2		AFF3	AF4/FMR2 family, member 3	3.293	0	XM_002691147.2		FTO	fat mass and obesity associated	2.936	0	NM_001098142.1								BCL11A	B-cell CLL/lymphoma 11A (zinc finger protein)	4.639	0	NM_001076121.1		MAML2	mastermind-like 2 (Drosophila)	3.358	0.025	NM_001098050.1
LOC100848544	uncharacterized LOC100848544	2.984	0.002	NM_001075858.2		RPL17	ribosomal protein L17	-2.265	0.018	NM_001034459.1		ZEB1	zinc finger E-box binding homeobox 1	2.893	0.001	NM_001206590.1		CDC14A	cell division cycle 14A	3.286	0	XM_002686168.1		EIF4G3	eukaryotic translation initiation factor 4 gamma, 3	2.931	0	XM_003585795.1								DNMT3A	DNA (cytosine-5-)-methyltransferase 3 alpha	4.636	0	NM_001206502.1		ADD1	adducin 1 (alpha)	3.352	0.026	NM_001205999.1
SPG11	spastic paraplegia 11 (autosomal recessive)	2.974	0.002	XR_139291.1		NXPH1	neurexophilin 1	-2.271	0.017	NM_001034762.1		BANK1	B-cell scaffold protein with ankyrin repeats 1	2.891	0.001	XM_002688119.2		KLF12	Kruppel-like factor 12	3.286	0	NM_001191270.2		ZNF609	zinc finger protein 609	2.929	0	NM_001193023.1								PRR12	proline rich 12	4.618	0	XM_002695118.1		PPP3CA	protein phosphatase 3, catalytic subunit, alpha isozyme	3.349	0.026	NM_174787.2
NFE2L3	nuclear factor (erythroid-derived 2)-like 3	2.96	0.002	XM_002691092.1		RPL4	ribosomal protein L4	-2.412	0.009	NM_001014894.1		WDFY4	WDFY family member 4	2.885	0.001	NM_001205945.1		TNFSF10	tumor necrosis factor (ligand) superfamily, member 10	3.284	0	XM_002684917.1		RSRC1	arginine/serine-rich coiled-coil 1	2.916	0.001	NM_001075404.1								SSBP3	single stranded DNA binding protein 3	4.614	0.001	NM_001104986.1		FAM107B	family with sequence similarity 107, member B	3.346	0.026	NM_001046393.1
KLF12	Kruppel-like factor 12	2.953	0.002	NM_001077899.2		LRRC16A	leucine rich repeat containing 16A	-2.462	0.007	NM_001192903.1		ZNF608	zinc finger protein 608	2.881	0.001	NM_001206306.1		LOC535946	KAT8 regulatory NSL complex subunit 1	3.274	0	XM_003587457.1		AVEN	apoptosis, caspase activation inhibitor	2.909	0.001	XM_002690781.2								SMG6	smg-6 homolog, nonsense mediated mRNA decay factor (C. elegans)	4.589	0.001	NM_001205827.1		SLC30A7	solute carrier family 30 (zinc transporter), member 7	3.333	0.026	NM_001083760.1
PRKCB	protein kinase C, beta	2.942	0.002	NM_001191270.2								MEF2A	myocyte enhancer factor 2A	2.878	0.001	NM_001083638.1		LOC100847919	uncharacterized LOC100847919	3.256	0	XM_003586484.1		CDC14A	cell division cycle 14A	2.905	0	XM_003585862.1								GRB2	growth factor receptor-bound protein 2	4.577	0.001	NM_001034630.1		EIF4G3	eukaryotic translation initiation factor 4 gamma, 3	3.331	0.006	XM_003585794.1
PIP4K2A	phosphatidylinositol-5-phosphate 4-kinase, type II, alpha	2.935	0.003	NM_174587.1								IKZF2	IKAROS family zinc finger 2 (Helios)	2.877	0.001	XM_002685559.2		POLA1	polymerase (DNA directed), alpha 1, catalytic subunit	3.255	0	NM_001206065.1		SLC25A26	solute carrier family 25 (S-adenosylmethionine carrier), member 26	2.905	0.001	XM_003587627.1								ABCC1	ATP-binding cassette, sub-family C (CFTR/MRP), member 1	4.574	0.001	NM_174223.1		SSBP2	single-stranded DNA binding protein 2	3.331	0.027	NM_001035478.1
RASSF3	Ras association (RalGDS/AF-6) domain family member 3	2.935	0.003	NM_001192769.1								ARL15	ADP-ribosylation factor-like 15	2.869	0.001	NM_001014943.1		ARID1B	AT rich interactive domain 1B (SWI1-like)	3.254	0	XM_002690360.2		ADK	adenosine kinase	2.889	0.001	NM_001076066.1								RASSF3	Ras association (RalGDS/AF-6) domain family member 3	4.542	0.001	NM_001192886.2		MCU	mitochondrial calcium uniporter	3.322	0.027	NM_001206102.1
LRRC8D	leucine rich repeat containing 8 family, member D	2.93	0.003	NM_001192886.2								IKZF2	IKAROS family zinc finger 2 (Helios)	2.867	0.001	XM_002685560.1		C1H3orf70	chromosome 1 open reading frame, human C3orf70	3.251	0	NM_001195030.1		SUPT3H	suppressor of Ty 3 homolog (S. cerevisiae)	2.885	0.001	NM_001105008.1								CRAMP1L	Crm, cramped-like (Drosophila)	4.539	0.001	NM_001205874.1		ARID1B	AT rich interactive domain 1B (SWI1-like)	3.316	0.027	XM_002690360.2
CDC14A	cell division cycle 14A	2.925	0.003	NM_001083741.1								ATP10D	ATPase, class V, type 10D	2.86	0.001	NM_001105628.1		RSBN1L	round spermatid basic protein 1-like	3.25	0	XM_002686750.1		STRBP	spermatid perinuclear RNA binding protein	2.883	0.001	NM_001075739.1								CHST11	carbohydrate (chondroitin 4) sulfotransferase 11	4.53	0.001	NM_001192668.1		EXT1	exostosin 1	3.316	0.027	NM_001098095.1
ITPKB	inositol-trisphosphate 3-kinase B	2.914	0.003	XM_003585862.1								IKZF2	IKAROS family zinc finger 2 (Helios)	2.85	0.001	XM_003585767.1		RFX3	transcription factor RFX3-like	3.249	0	XM_002689615.1		C5H12orf62	COX14 cytochrome c oxidase assembly homolog (S. cerevisiae)	2.881	0.001	NM_001195064.1								CD38	CD38 molecule	4.507	0.001	NM_175798.3		CNOT4	CCR4-NOT transcription complex, subunit 4	3.314	0.027	NM_001035432.1
NFATC3	nuclear factor of activated T-cells, cytoplasmic, calcineurin-dependent 3	2.91	0.003	XM_002707735.1								RHOH	ras homolog gene family, member H	2.846	0.001	NM_001078124.1		NIPAL1	NIPA-like domain containing 1	3.234	0	NM_001192302.1		LOC100847553	uncharacterized LOC100847553	2.881	0.001	XM_003586631.1								RPTOR	regulatory associated protein of MTOR, complex 1	4.5	0.001	NM_001192130.1		MED13L	mediator complex subunit 13-like	3.314	0.027	NM_001192468.1
RFX3	transcription factor RFX3-like	2.905	0.003	NM_001192831.1								SGMS1	sphingomyelin synthase 1	2.846	0.001	NM_001206135.1		LOC100849042	phosphodiesterase 7A	3.219	0	XM_003586888.1		TBCE	tubulin folding cofactor E	2.864	0.001	NM_001038032.1								PPP6R3	protein phosphatase 6, regulatory subunit 3	4.48	0.001	NM_001105372.1		RAF1	v-raf-1 murine leukemia viral oncogene homolog 1	3.307	0.028	NM_001102505.1
ZCCHC7	zinc finger, CCHC domain containing 7	2.904	0.003	XM_002689615.1								DAAM1	dishevelled associated activator of morphogenesis 1	2.841	0.001	NM_001081588.1		FOXP1	forkhead box P1	3.218	0	NM_001083689.1		FCRL1	Fc receptor-like 1	2.832	0.001	NM_001102045.1								DGKD	diacylglycerol kinase, delta 130kDa	4.479	0.001	NM_001035282.2		CDK13	cyclin-dependent kinase 13	3.299	0.042	NM_001206622.1
PPP2R5E	protein phosphatase 2, regulatory subunit B', epsilon isoform	2.902	0.003	NM_001046100.1								ZNRF1	zinc and ring finger 1	2.827	0.001	NM_001192210.1		ADK	adenosine kinase	3.217	0	NM_001076066.1		TMEM164	transmembrane protein 164	2.829	0.001	NM_001031762.1								MAU2	MAU2 chromatid cohesion factor homolog (C. elegans)	4.477	0.001	XM_002688519.2		EAF2	ELL associated factor 2	3.294	0.028	NM_001046507.1
CDC14A	cell division cycle 14A	2.899	0.003	NM_001083468.1								NFYC	nuclear transcription factor Y, gamma	2.82	0.001	NM_001034598.1		C8H9orf3	chromosome 8 open reading frame, human C9orf3	3.211	0	NM_001206980.1		VPS13B	vacuolar protein sorting 13 homolog B (yeast)	2.825	0.001	XM_002692791.2								TNRC18	trinucleotide repeat containing 18	4.472	0.001	XM_002698226.2		SLC4A7	solute carrier family 4, sodium bicarbonate cotransporter, member 7	3.293	0.028	NM_001098926.2
FCRL3	Fc receptor-like 3	2.891	0.003	XM_002686168.1								STRBP	spermatid perinuclear RNA binding protein	2.813	0.001	NM_001075739.1		CNNM2	cyclin M2	3.209	0	NM_001191172.1		ITFG1	integrin alpha FG-GAP repeat containing 1	2.811	0.001	NM_001038532.1								LRCH1	leucine-rich repeats and calponin homology (CH) domain containing 1	4.466	0.001	XM_002691830.1		ZNF609	zinc finger protein 609	3.293	0.028	NM_001193023.1
PRKCH	protein kinase C, eta	2.885	0.003	XM_002685955.1								IKZF3	IKAROS family zinc finger 3 (Aiolos)	2.812	0.001	NM_001081613.1		CDK19	cyclin-dependent kinase 19	3.195	0	NM_001205707.1		TRIT1	tRNA isopentenyltransferase 1	2.811	0.001	NM_001192840.1								ELMO1	engulfment and cell motility 1	4.465	0.003	NM_001113227.1		HERC1	hect (homologous to the E6-AP (UBE3A) carboxyl terminus) domain and RCC1 (CHC1)-like domain (RLD) 1	3.289	0.028	NM_001103282.1
IKZF3	IKAROS family zinc finger 3 (Aiolos)	2.875	0.003	NM_001076863.1								TGFBR1	transforming growth factor, beta receptor 1	2.81	0.001	NM_174621.2		VPS8	vacuolar protein sorting 8 homolog (S. cerevisiae)	3.188	0	XM_002684849.2		LOC535946	KAT8 regulatory NSL complex subunit 1	2.81	0.001	XM_003587457.1								NDUFA10	NADH dehydrogenase (ubiquinone) 1 alpha subcomplex, 10, 42kDa	4.456	0.001	NM_176655.2		RPS6KA6	ribosomal protein S6 kinase, 90kDa, polypeptide 6	3.288	0.028	NM_001205926.1
SETX	senataxin	2.872	0.003	NM_001081613.1								HDAC9	histone deacetylase 9	2.801	0.001	XM_003585945.1		VPS8	vacuolar protein sorting 8 homolog (S. cerevisiae)	3.188	0	XM_003585662.1		ELMO1	engulfment and cell motility 1	2.809	0	NM_001024505.2								TAF4	TAF4 RNA polymerase II, TATA box binding protein (TBP)-associated factor, 135kDa	4.454	0.001	XM_002692259.2		RRAS2	related RAS viral (r-ras) oncogene homolog 2	3.288	0.028	NM_001099010.1
TNRC6B	trinucleotide repeat containing 6B	2.864	0.003	XM_002691649.2								HDAC9	histone deacetylase 9	2.801	0.001	XM_003585947.1		CRLS1	cardiolipin synthase 1	3.185	0	NM_001098951.1		ETV6	ets variant 6	2.806	0.001	NM_001015514.2								RASA3	RAS p21 protein activator 3	4.449	0.001	NM_174676.3		SLC35D2	solute carrier family 35, member D2	3.281	0.029	NM_001206266.1
TNIK	TRAF2 and NCK interacting kinase	2.862	0.003	NM_001192655.1								KSR1	kinase suppressor of ras 1	2.797	0.001	XM_002695662.1		RNF130	ring finger protein 130	3.184	0	NM_001099708.1		LOC505766	BMP2 inducible kinase	2.805	0.001	XM_003586219.1								ST3GAL5	ST3 beta-galactoside alpha-2,3-sialyltransferase 5	4.439	0.001	NM_205807.2		ZNRF1	zinc and ring finger 1	3.28	0.029	NM_001192210.1
TLK2	tousled-like kinase 2	2.857	0.003	XM_003585679.1								LOC100848671	uncharacterized LOC100848671	2.785	0.001	XM_003586038.1		EIF4G3	eukaryotic translation initiation factor 4 gamma, 3	3.183	0	XM_003585795.1		FCRL3	Fc receptor-like 3	2.803	0.001	XM_002685955.1								CRTC3	CREB regulated transcription coactivator 3	4.435	0.001	XM_002696570.2		RNF130	ring finger protein 130	3.274	0.029	NM_001099708.1
ARID1B	AT rich interactive domain 1B (SWI1-like)	2.853	0.003	NM_001192827.1								HDAC9	histone deacetylase 9	2.775	0.001	XM_002686702.2		FBXO11	F-box protein 11	3.178	0	NM_001101894.1		EIF4G3	eukaryotic translation initiation factor 4 gamma, 3	2.802	0.001	XM_003585796.1								NISCH	nischarin	4.422	0.001	XM_002697064.1		C23H6orf106	chromosome 23 open reading frame, human C6orf106	3.269	0.029	NM_001076471.1
LCLAT1	lysocardiolipin acyltransferase 1	2.849	0.003	XM_002690360.2								RTN3	reticulon 3	2.766	0.001	NM_182657.1		LOC100336707	nuclear receptor binding SET domain protein 1-like	3.174	0	XM_002689017.2		DIP2B	DIP2 disco-interacting protein 2 homolog B (Drosophila)	2.798	0.001	NM_001192309.1								CCM2	cerebral cavernous malformation 2	4.421	0.001	NM_001193211.1		RALGPS2	Ral GEF with PH domain and SH3 binding motif 2	3.261	0.03	NM_001191426.1
LOC516599	tripartite motif containing 5-like	2.849	0.003	XM_002691445.1								AFF3	AF4/FMR2 family, member 3	2.765	0.001	XM_002691147.2		C6H4orf21	zinc finger, GRF-type containing 1	3.17	0	XM_002688075.1		LRBA	LPS-responsive vesicle trafficking, beach and anchor containing	2.798	0.001	XM_002694326.1								CELF2	CUGBP, Elav-like family member 2	4.4	0.001	NM_001078165.1		IP6K1	inositol hexakisphosphate kinase 1	3.258	0.03	NM_001076010.1
BCAS3	breast carcinoma amplified sequence 3	2.847	0.003	XM_002693205.1								MAN1A1	mannosyl-oligosaccharide 1,2-alpha-mannosidase IA-like	2.761	0.001	NM_001205972.1		COG5	component of oligomeric golgi complex 5	3.17	0	XM_003585967.1		VPS8	vacuolar protein sorting 8 homolog (S. cerevisiae)	2.797	0.001	XM_002684849.2								BACH2	BTB and CNC homology 1, basic leucine zipper transcription factor 2	4.358	0.001	XM_002690189.1		TNRC6B	trinucleotide repeat containing 6B	3.256	0.03	NM_001192655.1
LRCH1	leucine-rich repeats and calponin homology (CH) domain containing 1	2.837	0.004	XM_002695612.2								FTO	fat mass and obesity associated	2.759	0.001	NM_001098142.1		PACS1	phosphofurin acidic cluster sorting protein 1	3.169	0	NM_001143870.1		ZCCHC7	zinc finger, CCHC domain containing 7	2.787	0.001	NM_001046100.1								DGKA	diacylglycerol kinase, alpha 80kDa	4.357	0.001	NM_001077860.1		LOC615842	Alport syndrome, mental retardation, midface hypoplasia and elliptocytosis chromosomal region gene 1	3.255	0.03	XM_003588138.1
LOC100847196	uncharacterized LOC100847196	2.836	0.004	XM_002691830.1								LOC100336707	nuclear receptor binding SET domain protein 1-like	2.753	0.001	XM_002689017.2		DYM	dymeclin	3.167	0	NM_001192999.1		CNNM2	cyclin M2	2.783	0.001	NM_001191172.1								LOC534755	family with sequence similarity 193, member A	4.356	0.001	XM_003586229.1		CNNM3	cyclin M3	3.252	0.03	XM_002691165.2
KDM4C	lysine (K)-specific demethylase 4C	2.827	0.004	XM_003587477.1								SNX29	sorting nexin 29	2.751	0.001	NM_001076862.1		TLK1	tousled-like kinase 1	3.16	0.001	XM_002685281.2		ZRANB3	zinc finger, RAN-binding domain containing 3	2.782	0.001	XM_002685411.2								AMBRA1	autophagy/beclin-1 regulator 1	4.355	0.001	XM_003587010.1		ATRN	attractin	3.251	0.03	NM_173995.2
USP34	ubiquitin specific peptidase 34	2.827	0.004	XM_002689595.2								C23H6orf106	chromosome 23 open reading frame, human C6orf106	2.749	0.001	NM_001076471.1		HMBOX1	homeobox containing 1	3.157	0	NM_001192171.1		SLC35D2	solute carrier family 35, member D2	2.776	0.001	NM_001206266.1								CELF1	CUGBP, Elav-like family member 1	4.354	0.001	NM_001101212.1		LOC100849042	phosphodiesterase 7A	3.251	0.03	XM_003586888.1
RBM41	RNA binding motif protein 41	2.824	0.004	XM_002691422.2								RUNX1	runt-related transcription factor 1	2.748	0.001	XM_002685147.2		IMMP1L	IMP1 inner mitochondrial membrane peptidase-like (S. cerevisiae)	3.153	0	NM_001079627.1		PRKCB	protein kinase C, beta	2.773	0.001	NM_174587.1								GNB1	guanine nucleotide binding protein (G protein), beta polypeptide 1	4.354	0.001	NM_175777.3		MBNL1	muscleblind-like splicing regulator 1	3.247	0.031	NM_001099725.1
TUBGCP5	tubulin, gamma complex associated protein 5	2.81	0.004	XM_002699883.2								ZNF318	zinc finger protein 318	2.744	0.001	XM_002697298.1		ARIH1	ariadne homolog, ubiquitin-conjugating enzyme E2 binding protein, 1 (Drosophila)	3.144	0	NM_001081714.1		RUNX1T1	runt-related transcription factor 1; translocated to, 1 (cyclin D-related)	2.772	0.001	NM_001099385.1								PRKCA	protein kinase C, alpha	4.35	0.001	NM_174435.1		NAV3	neuron navigator 3	3.244	0.031	NM_001192669.2
TFCP2	transcription factor CP2	2.809	0.004	NM_001102495.1								GRB2	growth factor receptor-bound protein 2	2.737	0.001	NM_001034630.1		KCNQ5	potassium voltage-gated channel, KQT-like subfamily, member 5	3.142	0	XM_002690016.2		MDM4	Mdm4 p53 binding protein homolog (mouse)	2.768	0.001	NM_001046169.1								GIMAP8	GTPase, IMAP family member 8	4.333	0.001	XM_002687147.2		NCK1	NCK adaptor protein 1	3.241	0.031	NM_001076072.1
ARID2	AT rich interactive domain 2 (ARID, RFX-like)	2.808	0.004	NM_001083397.1								LOC505766	BMP2 inducible kinase	2.719	0.001	XM_003586219.1		ORC4	origin recognition complex, subunit 4	3.132	0	NM_001046301.1		CHM	choroideremia (Rab escort protein 1)	2.766	0.001	NM_001205389.1								LOC510083	dedicator of cytokinesis 2	4.316	0.001	XM_003587495.1		RSBN1L	round spermatid basic protein 1-like	3.226	0.032	XM_002686750.1
GIMAP8	GTPase, IMAP family member 8	2.807	0.004	XM_002687323.2								NFE2L3	nuclear factor (erythroid-derived 2)-like 3	2.71	0.001	NM_001077899.2		ABL2	v-abl Abelson murine leukemia viral oncogene homolog 2	3.129	0	NM_001143855.1		RNF130	ring finger protein 130	2.757	0.001	NM_001099708.1								TBC1D22A	TBC1 domain family, member 22A	4.311	0.001	NM_001076520.1		BLNK	B-cell linker	3.219	0.033	NM_001046054.1
STAT4	signal transducer and activator of transcription 4	2.799	0.004	XM_002687147.2								UBE2E2	ubiquitin-conjugating enzyme E2E 2	2.708	0.001	NM_001191190.1		MARK3	MAP/microtubule affinity-regulating kinase 3	3.128	0	XM_002696784.2		ABL2	v-abl Abelson murine leukemia viral oncogene homolog 2	2.751	0.001	NM_001143855.1								ASAP1	ArfGAP with SH3 domain, ankyrin repeat and PH domain 1	4.291	0.001	NM_175821.2		LCLAT1	lysocardiolipin acyltransferase 1	3.217	0.033	XM_002691445.1
ETV6	ets variant 6	2.797	0.004	XM_002685461.1								MARK3	MAP/microtubule affinity-regulating kinase 3	2.696	0.001	XM_002696784.2		FAM190B	family with sequence similarity 190, member B	3.125	0.001	XM_003587997.1		MAML3	mastermind-like 3 (Drosophila)	2.726	0.001	XM_003587128.1								PRKD2	protein kinase D2	4.282	0.001	XM_002695103.2		RYBP	RING1 and YY1 binding protein	3.215	0.033	XM_002696972.2
IL6ST	interleukin 6 signal transducer (gp130, oncostatin M receptor)	2.796	0.004	NM_001015514.2								DENND5B	DENN/MADD domain containing 5B	2.693	0.001	NM_001205488.1		PHF21A	PHD finger protein 21A	3.121	0	NM_001206197.1		TPK1	thiamin pyrophosphokinase 1	2.72	0.001	NM_001080370.1								CDK16	cyclin-dependent kinase 16	4.276	0.002	NM_001101226.1		EBF1	early B-cell factor 1	3.205	0.034	NM_001192916.1
EML4	echinoderm microtubule associated protein like 4	2.793	0.004	XM_002696322.2								ATP2B1	ATPase, Ca++ transporting, plasma membrane 1	2.676	0.002	NM_174696.2		SLC30A7	solute carrier family 30 (zinc transporter), member 7	3.118	0	NM_001083760.1		XPR1	xenotropic and polytropic retrovirus receptor 1	2.715	0.001	NM_001192883.1								BCAS3	breast carcinoma amplified sequence 3	4.275	0.002	XM_002695612.2		SKAP1	src kinase associated phosphoprotein 1	3.19	0.035	XM_002695944.2
BIRC6	baculoviral IAP repeat containing 6	2.781	0.004	NM_001193054.1								VPS13B	vacuolar protein sorting 13 homolog B (yeast)	2.673	0.002	XM_002692791.2		CRAMP1L	Crm, cramped-like (Drosophila)	3.105	0	NM_001205874.1		FNIP1	folliculin interacting protein 1	2.714	0.001	XM_002688971.2								NLRC5	NLR family, CARD domain containing 5	4.275	0.002	XM_002694790.1		PIP4K2A	phosphatidylinositol-5-phosphate 4-kinase, type II, alpha	3.189	0.036	NM_001192769.1
FOXO1	forkhead box O1	2.774	0.005	NM_001206582.1								FAM175A	family with sequence similarity 175, member A	2.664	0.002	NM_001015516.1		LOC537017	cytidine monophosphate-N-acetylneuraminic acid hydroxylase-like	3.101	0	XM_002697563.2		ATF6	activating transcription factor 6	2.713	0.001	XM_003585816.1								ARHGAP17	Rho GTPase activating protein 17	4.274	0.002	XM_002698028.2		LOC100335747	uncharacterized LOC100335747	3.182	0.036	XM_002689668.2
ARHGAP17	Rho GTPase activating protein 17	2.762	0.005	XM_002691748.2								ITFG1	integrin alpha FG-GAP repeat containing 1	2.661	0.002	NM_001038532.1		NBEA	neurobeachin	3.097	0.006	XM_002691752.2-1		SLC30A7	solute carrier family 30 (zinc transporter), member 7	2.713	0.001	NM_001083760.1								EVL	Enah/Vasp-like	4.271	0.002	NM_001192084.1		SMYD3	SET and MYND domain containing 3	3.174	0.037	NM_001076406.1
CYLD	cylindromatosis (turban tumor syndrome)	2.76	0.005	XM_002698028.2								BCL2	B-cell CLL/lymphoma 2	2.648	0.002	NM_001166486.1		UST	uronyl-2-sulfotransferase	3.094	0.001	NM_001206826.1		SUCLG2	succinate-CoA ligase, GDP-forming, beta subunit	2.709	0.001	NM_001034639.1								LOC100848984	uncharacterized LOC100848984	4.252	0.002	XR_139265.1		STIM2	stromal interaction molecule 2	3.167	0.038	XM_002688161.2
PARP12	poly (ADP-ribose) polymerase family, member 12	2.756	0.005	NM_001046417.1								C4H7orf44	cytochrome C oxidase assembly factor 1 homolog (S. cerevisiae)	2.645	0.002	NM_001034256.1		FANCC	Fanconi anemia, complementation group C	3.089	0.007	NM_174316.2-1		LRCH1	leucine-rich repeats and calponin homology (CH) domain containing 1	2.708	0.001	XM_002691830.1								LOC100848984	uncharacterized LOC100848984	4.252	0.002	XR_139266.1		NFKB1	nuclear factor of kappa light polypeptide gene enhancer in B-cells 1	3.165	0.038	NM_001076409.1
NBEA	neurobeachin	2.753	0.012	NM_001192344.1								MCU	mitochondrial calcium uniporter	2.645	0.002	NM_001206102.1		LRBA	LPS-responsive vesicle trafficking, beach and anchor containing	3.082	0.001	XM_002694326.1		SSBP2	single-stranded DNA binding protein 2	2.707	0.001	NM_001035478.1								EXOC4	exocyst complex component 4	4.245	0.002	NM_001102207.1		AVEN	apoptosis, caspase activation inhibitor	3.164	0.038	XM_002690781.2
C26H10orf76	chromosome 26 open reading frame, human C10orf76	2.752	0.005	XM_003586700.1-2								CDK19	cyclin-dependent kinase 19	2.632	0.002	NM_001205707.1		EIF4G3	eukaryotic translation initiation factor 4 gamma, 3	3.081	0.001	XM_003585796.1		FHIT	fragile histidine triad gene	2.7	0.002	NM_001040646.1								FUS	fused in sarcoma	4.239	0.002	NM_173912.1		CBLB	Cas-Br-M (murine) ecotropic retroviral transforming sequence b	3.157	0.038	NM_001205923.1
RRAS2	related RAS viral (r-ras) oncogene homolog 2	2.748	0.005	XM_002698448.1								CNOT4	CCR4-NOT transcription complex, subunit 4	2.626	0.002	NM_001035432.1		FAM190B	family with sequence similarity 190, member B	3.073	0	XM_002698895.2		AFF3	AF4/FMR2 family, member 3	2.693	0.002	XM_002691147.2								HEATR7A	HEAT repeat containing 7A	4.23	0.002	NM_001102018.1		ARHGAP15	Rho GTPase activating protein 15	3.149	0.039	NM_001105003.1
RPS6KA6	ribosomal protein S6 kinase, 90kDa, polypeptide 6	2.743	0.005	NM_001099010.1								ANXA3	annexin A3	2.62	0.002	NM_001035325.1		DIP2B	DIP2 disco-interacting protein 2 homolog B (Drosophila)	3.072	0.001	NM_001192309.1		AAK1	AP2 associated kinase 1	2.687	0.002	XM_002691441.2								SERGEF	secretion regulating guanine nucleotide exchange factor	4.217	0.002	NM_001076021.1		KLHL2	kelch-like 2, Mayven (Drosophila)	3.149	0.039	NM_001102160.1
IGF2BP3	insulin-like growth factor 2 mRNA binding protein 3	2.739	0.005	NM_001205926.1								STIM2	stromal interaction molecule 2	2.616	0.002	XM_002688161.2		SMCHD1	structural maintenance of chromosomes flexible hinge domain containing 1	3.055	0.001	NM_001206400.1		PLCL2	phospholipase C-like 2	2.684	0.002	NM_001192255.1								UBE2H	ubiquitin-conjugating enzyme E2H	4.216	0.002	NM_001037614.1		UTRN	utrophin	3.131	0.041	XM_002690294.2
C1H3orf70	chromosome 1 open reading frame, human C3orf70	2.737	0.005	NM_001192288.1								TOX	thymocyte selection-associated high mobility group box	2.616	0.002	NM_001102096.1		TOX	thymocyte selection-associated high mobility group box	3.055	0.001	NM_001102096.1		ACAP2	ArfGAP with coiled-coil, ankyrin repeat and PH domains 2	2.681	0.002	NM_001105337.1								RBM6	RNA binding motif protein 6	4.204	0.002	XM_002697034.1		LOC100299071	uncharacterized LOC100299071	3.123	0.041	XM_002694863.2
CCDC109B	coiled-coil domain containing 109B	2.734	0.005	NM_001195030.1								TPC3	two pore channel 3	2.616	0.002	NM_001161651.1		PAN3	PAN3 poly(A) specific ribonuclease subunit homolog (S. cerevisiae)	3.052	0.001	XM_003586703.1		PPP2R5E	protein phosphatase 2, regulatory subunit B', epsilon isoform	2.677	0.002	NM_001083468.1								MTMR3	myotubularin related protein 3	4.203	0.002	NM_001081605.1		NR3C1	nuclear receptor subfamily 3, group C, member 1 (glucocorticoid receptor)	3.123	0.041	NM_001206634.1
RUNX1	runt-related transcription factor 1	2.734	0.005	NM_001075171.1								GDA	guanine deaminase	2.604	0.002	NM_001192620.1		CDK13	cyclin-dependent kinase 13	3.042	0.001	NM_001206622.1		ZBTB20	zinc finger and BTB domain containing 20	2.676	0.002	XM_003585639.1								WIPF2	WAS/WASL interacting protein family, member 2	4.197	0.002	NM_001206276.1		CELF2	CUGBP, Elav-like family member 2	3.122	0.042	NM_001078165.1
R3HDM2	R3H domain containing 2	2.73	0.006	XM_002685147.2								SRGAP2	SLIT-ROBO Rho GTPase activating protein 2	2.602	0.002	NM_001205865.1		SP140	SP140 nuclear body protein	3.037	0.001	NM_001075447.1		FOXP1	forkhead box P1	2.672	0.002	NM_001083689.1								LOC100296943	uncharacterized LOC100296943	4.177	0.002	XM_002690187.1		PPP2R5E	protein phosphatase 2, regulatory subunit B', epsilon isoform	3.118	0.042	NM_001083468.1
DIP2B	DIP2 disco-interacting protein 2 homolog B (Drosophila)	2.716	0.006	NM_001078034.1								ADK	adenosine kinase	2.599	0.002	NM_001076066.1		LOC100847196	uncharacterized LOC100847196	3.034	0.001	XM_003587477.1		LOC100848900	uncharacterized LOC100848900	2.662	0.002	XR_139743.1								SND1	staphylococcal nuclease and tudor domain containing 1	4.177	0.002	NM_205784.1		CDK13	cyclin-dependent kinase 13	3.114	0.028	NM_001205431.1
LRRC8C	leucine rich repeat containing 8 family, member C	2.715	0.006	NM_001192309.1								MED13L	mediator complex subunit 13-like	2.595	0.002	NM_001192468.1		EIF2C3	eukaryotic translation initiation factor 2C, 3	3.031	0.001	NM_001001133.1		MACF1	microtubule-actin crosslinking factor 1	2.651	0.002	NM_001143860.1								SHKBP1	SH3KBP1 binding protein 1	4.175	0.002	NM_001082607.1		CHM	choroideremia (Rab escort protein 1)	3.114	0.042	NM_001205389.1
TBC1D5	TBC1 domain family, member 5	2.703	0.006	NM_001099039.1								PITPNC1	phosphatidylinositol transfer protein, cytoplasmic 1	2.594	0.002	XM_003587467.1		TNKS	tankyrase, TRF1-interacting ankyrin-related ADP-ribose polymerase	3.031	0.001	NM_001206160.1		KYNU	kynureninase	2.649	0.002	NM_001191308.1								PTPN1	protein tyrosine phosphatase, non-receptor type 1	4.169	0.002	NM_001100326.1		SNRK	SNF related kinase	3.113	0.042	XM_002696930.1
USP18	ubiquitin specific peptidase 18	2.7	0.006	NM_001205489.1								SESN1	sestrin 1	2.591	0.002	NM_001101174.1		NLK	nemo-like kinase	3.024	0.001	NM_001193253.1		LOC100848900	uncharacterized LOC100848900	2.647	0.002	XR_139742.1								MGAT5	mannosyl (alpha-1,6-)-glycoprotein beta-1,6-N-acetyl-glucosaminyltransferase	4.158	0.002	NM_001191342.1		UBE2H	ubiquitin-conjugating enzyme E2H	3.112	0.042	NM_001037614.1
DYM	dymeclin	2.698	0.006	NM_001017940.1								ZBTB20	zinc finger and BTB domain containing 20	2.59	0.002	XM_003585639.1		FHIT	fragile histidine triad gene	3.023	0.001	NM_001040646.1		DOCK11	dedicator of cytokinesis 11	2.646	0.002	XM_002699465.1-1								EIF4G3	eukaryotic translation initiation factor 4 gamma, 3	4.155	0.002	XM_003585795.1		RUNX1T1	runt-related transcription factor 1; translocated to, 1 (cyclin D-related)	3.11	0.043	NM_001099385.1
SUPT3H	suppressor of Ty 3 homolog (S. cerevisiae)	2.698	0.006	NM_001192999.1								PAX5	paired box 5	2.589	0.003	XM_002689717.2		PIK3R3	phosphoinositide-3-kinase, regulatory subunit 3 (gamma)	3.022	0.001	NM_174796.1		STIM2	stromal interaction molecule 2	2.634	0.002	XM_002688161.2								IP6K1	inositol hexakisphosphate kinase 1	4.153	0.002	NM_001076010.1		ETV6	ets variant 6	3.109	0.043	NM_001015514.2
NFYC	nuclear transcription factor Y, gamma	2.697	0.006	NM_001105008.1								ADD1	adducin 1 (alpha)	2.583	0.003	NM_001205999.1		NSMCE2	non-SMC element 2, MMS21 homolog (S. cerevisiae)	3.021	0.001	NM_001075797.1		ARID1B	AT rich interactive domain 1B (SWI1-like)	2.631	0.002	XM_002690360.2								RRAS2	related RAS viral (r-ras) oncogene homolog 2	4.146	0.002	NM_001099010.1		C4H7orf44	cytochrome C oxidase assembly factor 1 homolog (S. cerevisiae)	3.107	0.043	NM_001034256.1
MAP3K1	mitogen-activated protein kinase kinase kinase 1	2.695	0.006	NM_001034598.1								DOCK4	dedicator of cytokinesis 4	2.579	0.003	XM_002686809.2		FAM107B	family with sequence similarity 107, member B	3.015	0.001	NM_001046393.1		CCDC109B	coiled-coil domain containing 109B	2.628	0.002	NM_001075171.1								ARIH2	ariadne homolog 2 (Drosophila)	4.125	0.002	NM_001206242.1		C8H9orf3	chromosome 8 open reading frame, human C9orf3	3.107	0.043	NM_001206980.1
CSNK1G1	casein kinase 1, gamma 1	2.694	0.006	NM_001205906.1								SELO	selenoprotein O	2.578	0.003	NM_001163193.1		C5H12orf35	chromosome 5 open reading frame, human C12orf35	3.01	0.001	NM_001101072.1		C13H20orf196	chromosome 13 open reading frame, human C20orf196	2.617	0.002	NM_001046552.1								LOC100847584	uncharacterized LOC100847584	4.119	0.002	XR_139232.1		CRAMP1L	Crm, cramped-like (Drosophila)	3.092	0.044	NM_001205874.1
RAPGEF2	Rap guanine nucleotide exchange factor (GEF) 2	2.693	0.006	NM_001038146.1								MED27	mediator complex subunit 27	2.554	0.003	NM_001040546.1		DLG1	discs, large homolog 1 (Drosophila)	2.993	0.001	XM_002684855.2		CDK13	cyclin-dependent kinase 13	2.609	0.006	NM_001206622.1								CMIP	c-Maf inducing protein	4.113	0.003	XM_002694739.1		SRBD1	S1 RNA binding domain 1	3.089	0.045	NM_001205772.1
ORC4	origin recognition complex, subunit 4	2.686	0.007	NM_001191326.1								ASXL1	additional sex combs like 1 (Drosophila)	2.553	0.003	XM_002692288.1		UST	uronyl-2-sulfotransferase	2.992	0	NM_001206827.1		GBF1	golgi brefeldin A resistant guanine nucleotide exchange factor 1	2.607	0.002	NM_001081600.1								AAK1	AP2 associated kinase 1	4.098	0.003	XM_002691441.2		RERE	arginine-glutamic acid dipeptide (RE) repeats	3.088	0.045	XM_002694049.1
BBX	bobby sox homolog (Drosophila)	2.673	0.007	NM_001046301.1								DLG1	discs, large homolog 1 (Drosophila)	2.553	0.003	XM_002684855.2		LOC787099	zinc finger, CCHC domain containing 2	2.985	0.001	XM_003587776.1		MARK3	MAP/microtubule affinity-regulating kinase 3	2.606	0.002	XM_002696784.2								CCDC57	coiled-coil domain containing 57	4.088	0.003	XM_002696133.2		TLE4	transducin-like enhancer of split 4 (E(sp1) homolog, Drosophila)	3.082	0.045	NM_001081583.1
ACSS3	acyl-CoA synthetase short-chain family member 3	2.672	0.007	NM_001192759.1								MTSS1	metastasis suppressor 1	2.553	0.003	NM_001192581.1		RERE	arginine-glutamic acid dipeptide (RE) repeats	2.985	0.001	XM_002694049.1		CNOT4	CCR4-NOT transcription complex, subunit 4	2.604	0.002	NM_001035432.1								GATAD2A	GATA zinc finger domain containing 2A	4.08	0.003	NM_001103090.1		RAPGEF6	Rap guanine nucleotide exchange factor (GEF) 6	3.074	0.046	XM_003586276.1
KYNU	kynureninase	2.671	0.007	NM_001102137.1								SSBP2	single-stranded DNA binding protein 2	2.536	0.003	NM_001035478.1		UBR3	ubiquitin protein ligase E3 component n-recognin 3 (putative)	2.981	0.001	XM_002685283.1		BLNK	B-cell linker	2.601	0.002	NM_001046054.1								ARAP1	ArfGAP with RhoGAP domain, ankyrin repeat and PH domain 1	4.076	0.003	XM_002693437.1		SETX	senataxin	3.073	0.046	XM_002691649.2
FHIT	fragile histidine triad gene	2.665	0.007	NM_001191308.1								MAML2	mastermind-like 2 (Drosophila)	2.531	0.003	NM_001098050.1		ZRANB3	zinc finger, RAN-binding domain containing 3	2.977	0.001	XM_002685411.2		PHTF1	putative homeodomain transcription factor 1	2.601	0.002	NM_001076077.1								FTO	fat mass and obesity associated	4.076	0.003	NM_001098142.1		NFAT5	nuclear factor of activated T-cells 5, tonicity-responsive	3.068	0.047	XM_003587226.1
GRAMD3	GRAM domain containing 3	2.662	0.007	NM_001040646.1								NOTCH2	notch 2	2.53	0.003	XM_002686114.2		TLE4	transducin-like enhancer of split 4 (E(sp1) homolog, Drosophila)	2.976	0.001	NM_001081583.1		LOC100848984	uncharacterized LOC100848984	2.597	0.002	XR_139265.1								PITPNC1	phosphatidylinositol transfer protein, cytoplasmic 1	4.075	0.003	XM_003587467.1		TNRC18	trinucleotide repeat containing 18	3.062	0.047	XM_002698226.2
JARID2	jumonji, AT rich interactive domain 2	2.647	0.008	NM_001079579.1								RPS6KB1	ribosomal protein S6 kinase, 70kDa, polypeptide 1	2.529	0.003	NM_205816.1		LOC100847374	uncharacterized LOC100847374	2.973	0.001	XR_139227.1		LOC100848984	uncharacterized LOC100848984	2.597	0.002	XR_139266.1								ZEB1	zinc finger E-box binding homeobox 1	4.065	0.003	NM_001206590.1		MTMR3	myotubularin related protein 3	3.058	0.048	NM_001081605.1
MST4	serine/threonine protein kinase MST4	2.647	0.008	XM_002697579.2								USP40	ubiquitin specific peptidase 40	2.528	0.003	XM_002686556.1		SPATA5	spermatogenesis associated 5	2.969	0.001	XM_002694399.2		CENPI	centromere protein I	2.591	0.003	NM_001102494.1								CD22	CD22 molecule	4.063	0.003	XM_002695015.2		RAPGEF1	Rap guanine nucleotide exchange factor (GEF) 1	3.053	0.048	NM_001205872.1
CRLS1	cardiolipin synthase 1	2.634	0.008	NM_001163786.1								NSMCE2	non-SMC element 2, MMS21 homolog (S. cerevisiae)	2.526	0.003	NM_001075797.1		MYCBP2	MYC binding protein 2	2.968	0.001	NM_001192817.1		LOC100336707	nuclear receptor binding SET domain protein 1-like	2.586	0.003	XM_002689017.2								LOC100848036	homeobox protein cut-like 1-like	4.058	0.003	XM_003587840.1		AKAP13	A kinase (PRKA) anchor protein 13	3.041	0.05	XM_002696531.2
IMMP1L	IMP1 inner mitochondrial membrane peptidase-like (S. cerevisiae)	2.634	0.008	NM_001098951.1								ARHGAP24	Rho GTPase activating protein 24	2.523	0.003	NM_001102234.1		MAML3	mastermind-like 3 (Drosophila)	2.966	0.001	XM_003587128.1		DTNB	dystrobrevin, beta	2.585	0.003	NM_001192800.1								ELMO1	engulfment and cell motility 1	4.057	0.001	NM_001024505.2		RAPGEF6	Rap guanine nucleotide exchange factor (GEF) 6	2.813	0.046	XM_002688965.2
ELMO1	engulfment and cell motility 1	2.631	0.001	NM_001079627.1								KIAA1310	KIAA1310 ortholog	2.519	0.004	NM_001099172.1		MBNL1	muscleblind-like splicing regulator 1	2.966	0.001	NM_001099725.1		SPG11	spastic paraplegia 11 (autosomal recessive)	2.584	0.003	XM_002691092.1								CREBBP	CREB binding protein	4.055	0.003	NM_001164022.1		RAPGEF6	Rap guanine nucleotide exchange factor (GEF) 6	2.812	0.028	XM_003586275.1
FAM190B	family with sequence similarity 190, member B	2.63	0.01	NM_001024505.2								SND1	staphylococcal nuclease and tudor domain containing 1	2.517	0.004	NM_205784.1		R3HDM2	R3H domain containing 2	2.962	0.001	NM_001078034.1		KLHL2	kelch-like 2, Mayven (Drosophila)	2.578	0.003	NM_001102160.1								EHMT1	euchromatic histone-lysine N-methyltransferase 1	4.049	0.003	NM_001099041.1		MKLN1	muskelin 1, intracellular mediator containing kelch motifs	2.414	0.046	NM_001097999.1-1
ST3GAL5	ST3 beta-galactoside alpha-2,3-sialyltransferase 5	2.626	0.008	XM_003587997.1								EXOC2	exocyst complex component 2	2.516	0.004	NM_001206159.1		PRKCB	protein kinase C, beta	2.958	0.001	NM_174587.1		EAF2	ELL associated factor 2	2.574	0.003	NM_001046507.1								STIM1	stromal interaction molecule 1	4.048	0.003	NM_001035409.1		PTMA	prothymosin, alpha (gene sequence 28)	-2.251	0.039	NM_001039953.1
ZBTB25	zinc finger and BTB domain containing 25	2.622	0.008	NM_205807.2								LRRK2	leucine-rich repeat kinase 2	2.515	0.004	NM_001206086.1		RUNX2	runt-related transcription factor 2	2.954	0.001	XM_002697262.1		ACN9	ACN9 homolog (S. cerevisiae)	2.571	0.003	NM_001080352.1								PRKCH	protein kinase C, eta	4.047	0.003	NM_001076863.1		RPL35	ribosomal protein L35	-3.039	0.05	NM_001034495.1
COMMD1	copper metabolism (Murr1) domain containing 1	2.621	0.008	NM_001164023.1								FCRL3	Fc receptor-like 3	2.512	0.004	XM_002685955.1		RUNX2	runt-related transcription factor 2	2.954	0.001	XM_002697263.1		SRBD1	S1 RNA binding domain 1	2.571	0.003	NM_001205772.1								CRLF3	cytokine receptor-like factor 3	4.046	0.003	NM_001192650.1		EIF3D	eukaryotic translation initiation factor 3, subunit D	-3.04	0.05	NM_001034484.1
LEF1	lymphoid enhancer-binding factor 1	2.618	0.008	NM_001046384.1								MTMR3	myotubularin related protein 3	2.511	0.004	NM_001081605.1		LRRC8C	leucine rich repeat containing 8 family, member C	2.945	0.001	NM_001099039.1		AMN1	antagonist of mitotic exit network 1 homolog (S. cerevisiae)	2.568	0.003	NM_001075858.2								EPS15L1	epidermal growth factor receptor pathway substrate 15-like 1	4.044	0.003	NM_001101871.1		GABARAPL2	GABA(A) receptor-associated protein-like 2	-3.043	0.05	NM_174675.2
TBL1XR1	transducin (beta)-like 1 X-linked receptor 1	2.615	0.009	NM_001192856.1								DAPK1	death-associated protein kinase 1	2.508	0.004	NM_001206038.1-2		RALGAPA1	Ral GTPase activating protein, alpha subunit 1 (catalytic)	2.945	0.002	XM_003587577.1		CALCRL	calcitonin receptor-like	2.567	0.003	NM_001102107.1								PHF21A	PHD finger protein 21A	4.036	0.003	NM_001206197.1		CFL1	cofilin 1 (non-muscle)	-3.044	0.049	NM_001015655.1
PIK3AP1	phosphoinositide-3-kinase adaptor protein 1	2.612	0.009	NM_001193029.1								FCHSD2	FCH and double SH3 domains 2	2.505	0.004	XM_002693439.2		PCNX	pecanex homolog (Drosophila)	2.944	0.001	XM_002691050.1		PPP3CA	protein phosphatase 3, catalytic subunit, alpha isozyme	2.567	0.003	NM_174787.2								STRBP	spermatid perinuclear RNA binding protein	4.032	0.003	NM_001075739.1		NXPH1	neurexophilin 1	-3.046	0.049	NM_001034762.1
RALY	RNA binding protein, autoantigenic (hnRNP-associated with lethal yellow homolog (mouse))	2.612	0.009	XM_002698411.2								SOS1	son of sevenless homolog 1 (Drosophila)	2.505	0.004	XM_002691241.2		DDX10	DEAD (Asp-Glu-Ala-Asp) box polypeptide 10	2.936	0.001	NM_001076881.1		KIAA1328	KIAA1328 ortholog	2.564	0.003	XM_002697675.1								ATXN7L1	ataxin 7-like 1	4.031	0.012	NM_001166367.1		FGF18	fibroblast growth factor 18	-3.049	0.049	NM_001076007.1
ABL2	v-abl Abelson murine leukemia viral oncogene homolog 2	2.611	0.009	NM_001014847.1								AMBRA1	autophagy/beclin-1 regulator 1	2.503	0.004	XM_003587010.1		BDP1	B double prime 1, subunit of RNA polymerase III transcription initiation factor IIIB	2.93	0.001	XM_002696286.1		DCUN1D1	DCN1, defective in cullin neddylation 1, domain containing 1 (S. cerevisiae)	2.558	0.003	NM_001102233.1								BCL11B	B-cell CLL/lymphoma 11B (zinc finger protein)	4.018	0.003	XM_002696767.2		TOB2	transducer of ERBB2, 2	-3.056	0.048	NM_001083387.1
UBXN7	UBX domain protein 7	2.611	0.009	NM_001143855.1								CDC14A	cell division cycle 14A	2.5	0.004	XM_003585862.1		ATM	ataxia telangiectasia mutated	2.928	0.001	NM_001205935.1		LOC100848801	triple QxxK/R motif containing	2.557	0.013	XM_003586910.1								SLC7A6	solute carrier family 7 (amino acid transporter light chain, y+L system), member 6	4.007	0.003	NM_001075937.2		PAPPA	pregnancy-associated plasma protein A, pappalysin 1	-3.061	0.047	XM_002689953.2
SMCHD1	structural maintenance of chromosomes flexible hinge domain containing 1	2.604	0.009	NM_001206764.1								PFDN1	prefoldin subunit 1	2.5	0.004	NM_001078062.1		PRKCH	protein kinase C, eta	2.927	0.001	NM_001076863.1		ASXL1	additional sex combs like 1 (Drosophila)	2.556	0.003	XM_002692288.1								PDPR	pyruvate dehydrogenase phosphatase regulatory subunit	4.004	0.003	NM_174781.2		ZNF197	zinc finger protein 197	-3.063	0.047	NM_001206813.1
SENP7	sentrin-specific protease 7-like	2.601	0.009	NM_001206400.1								TMEM164	transmembrane protein 164	2.5	0.004	NM_001031762.1		MED13L	mediator complex subunit 13-like	2.926	0.001	NM_001192468.1		FANCC	Fanconi anemia, complementation group C	2.555	0.007	NM_174316.2-1								KIAA0415	KIAA0415 ortholog	3.993	0.004	NM_001205358.1		UBL5	ubiquitin-like 5	-3.065	0.047	NM_001037710.1
SP140L	SP140 nuclear body protein-like	2.595	0.009	NM_001101888.1								SUCLG2	succinate-CoA ligase, GDP-forming, beta subunit	2.497	0.004	NM_001034639.1		TPK1	thiamin pyrophosphokinase 1	2.926	0.001	NM_001080370.1		PFDN1	prefoldin subunit 1	2.551	0.003	NM_001078062.1								SLC25A26	solute carrier family 25 (S-adenosylmethionine carrier), member 26	3.988	0.004	XM_003587627.1		PRR13	proline rich 13	-3.067	0.047	NM_001038047.1
LRBA	LPS-responsive vesicle trafficking, beach and anchor containing	2.594	0.009	NM_001130765.1								CRTC3	CREB regulated transcription coactivator 3	2.487	0.004	XM_002696570.2		SCFD2	sec1 family domain containing 2	2.909	0.001	NM_001078005.1		STIM1	stromal interaction molecule 1	2.546	0.003	NM_001035409.1								ERI3	ERI1 exoribonuclease family member 3	3.977	0.004	NM_001046479.1		RPL36A	ribosomal protein L36a-like	-3.069	0.047	NM_001034316.1
EBF1	early B-cell factor 1	2.59	0.009	XM_002694326.1								TNFSF10	tumor necrosis factor (ligand) superfamily, member 10	2.486	0.004	XM_002684917.1		NSF	N-ethylmaleimide-sensitive factor	2.907	0.001	XM_002696057.2		VPRBP	Vpr (HIV-1) binding protein	2.546	0.003	XM_002697028.2								NXN	nucleoredoxin	3.976	0.004	NM_001102136.1		DOCK7	dedicator of cytokinesis 7	-3.089	0.045	NM_001192906.2
FTO	fat mass and obesity associated	2.587	0.009	NM_001192916.1								SERGEF	secretion regulating guanine nucleotide exchange factor	2.485	0.004	NM_001076021.1		CDK13	cyclin-dependent kinase 13	2.902	0.001	NM_001205431.1		KIAA1310	KIAA1310 ortholog	2.544	0.003	NM_001099172.1								DENND1B	DENN/MADD domain containing 1B	3.967	0.004	XM_002694231.2		LAMP1	lysosomal-associated membrane protein 1	-3.09	0.044	NM_001075124.1
RUNX2	runt-related transcription factor 2	2.587	0.009	NM_001098142.1								ATF6	activating transcription factor 6	2.484	0.004	XM_003585816.1		LIN54	lin-54 homolog (C. elegans)	2.9	0.001	NM_001205481.1		MAGI3	membrane associated guanylate kinase, WW and PDZ domain containing 3	2.54	0.003	NM_001192746.1								C26H10orf26	chromosome 26 open reading frame, human C10orf26	3.961	0.004	XM_002698456.2		RPL35A	ribosomal protein L35a	-3.091	0.044	NM_001025321.2
RUNX2	runt-related transcription factor 2	2.587	0.009	XM_002697262.1								ACAP2	ArfGAP with coiled-coil, ankyrin repeat and PH domains 2	2.483	0.004	NM_001105337.1		C11H2orf3	GC-rich sequence DNA-binding factor 2	2.897	0.001	XM_003586634.1		UIMC1	ubiquitin interaction motif containing 1	2.54	0.003	NM_001038061.2								SSH1	slingshot protein phosphatase 1	3.949	0.004	XM_002694601.1		RPL17	ribosomal protein L17	-3.093	0.044	NM_001034459.1
FAM190B	family with sequence similarity 190, member B	2.581	0.008	XM_002697263.1								GNG2	guanine nucleotide binding protein (G protein), gamma 2	2.482	0.004	NM_174072.3		C25H16orf52	chromosome 25 open reading frame, human C16orf52	2.892	0.001	XM_002697989.2		POLA1	polymerase (DNA directed), alpha 1, catalytic subunit	2.537	0.003	NM_001206065.1								RIN3	Ras and Rab interactor 3	3.941	0.004	XM_002696754.1		LOC783838	eukaryotic translation elongation factor 1 alpha 1 pseudogene	-3.096	0.044	XR_083736.2
SSBP2	single-stranded DNA binding protein 2	2.579	0.01	XM_002698895.2								ABCB7	ATP-binding cassette, sub-family B (MDR/TAP), member 7	2.475	0.004	NM_001192783.1		USP34	ubiquitin specific peptidase 34	2.891	0.001	XM_002691422.2		COG5	component of oligomeric golgi complex 5	2.536	0.003	XM_003585967.1								KLHL18	kelch-like 18 (Drosophila)	3.94	0.004	XM_003587651.1		COX5B	cytochrome c oxidase subunit Vb	-3.097	0.044	NM_001034046.1
RSBN1L	round spermatid basic protein 1-like	2.575	0.01	NM_001035478.1								SMYD3	SET and MYND domain containing 3	2.473	0.004	NM_001076406.1		CHM	choroideremia (Rab escort protein 1)	2.888	0.001	NM_001205389.1		NDUFA10	NADH dehydrogenase (ubiquinone) 1 alpha subcomplex, 10, 42kDa	2.535	0.003	NM_176655.2								FOXO3	forkhead box O3	3.932	0.004	NM_001206083.1		RPL36AL	ribosomal protein L36a-like	-3.097	0.044	NM_001079508.1
CLCN3	chloride channel 3	2.574	0.01	XM_002686750.1								MYO1E	myosin IE	2.472	0.004	XM_002690853.2		ADD3	adducin 3 (gamma)	2.876	0.001	NM_001075194.1		UVRAG	UV radiation resistance associated gene	2.531	0.003	NM_001193026.1								IFRD2	interferon-related developmental regulator 2	3.925	0.004	NM_001077012.1		LOC100848296	uncharacterized LOC100848296	-3.103	0.043	XR_139389.1
LOC100298723	myotubularin-related protein 8-like	2.571	0.01	NM_001193003.1								STX2	syntaxin 2	2.468	0.015	XM_003587141.1		SETX	senataxin	2.873	0.001	XM_002691649.2		ZBTB20	zinc finger and BTB domain containing 20	2.529	0.003	XM_003585640.1								LOC785419	upstream binding protein 1 (LBP-1a)	3.921	0.004	XM_003587609.1		TAGLN2	transgelin 2	-3.107	0.043	NM_001013599.1
C13H20orf196	chromosome 13 open reading frame, human C20orf196	2.557	0.01	XM_003588185.1								LOC100848452	uncharacterized LOC100848452	2.467	0.004	XM_003587288.1		TLK1	tousled-like kinase 1	2.869	0	XM_003585727.1		ARMC10	armadillo repeat containing 10	2.528	0.003	NM_001191332.1								LOC785419	upstream binding protein 1 (LBP-1a)	3.921	0.004	XM_003587610.1		MTMR12	myotubularin related protein 12	-3.123	0.041	XM_002696402.2
ACAP2	ArfGAP with coiled-coil, ankyrin repeat and PH domains 2	2.554	0.011	NM_001046552.1								ARIH2	ariadne homolog 2 (Drosophila)	2.464	0.004	NM_001206242.1		SYN1	synapsin I	2.867	0.001	XM_003588170.1-2		RALY	RNA binding protein, autoantigenic (hnRNP-associated with lethal yellow homolog (mouse))	2.523	0.003	NM_001014847.1								ATG16L1	ATG16 autophagy related 16-like 1 (S. cerevisiae)	3.904	0.005	NM_001191389.1		ARPC1B	actin related protein 2/3 complex, subunit 1B, 41kDa	-3.127	0.041	NM_001014844.2
CNNM2	cyclin M2	2.548	0.011	NM_001105337.1								CDC14A	cell division cycle 14A	2.464	0.004	XM_002686168.1		GIMAP8	GTPase, IMAP family member 8	2.866	0.001	XM_002687147.2		UTRN	utrophin	2.521	0.003	XM_002690294.2								LOC784517	solute carrier family 7 (cationic amino acid transporter, y+ system), member 3-like	3.897	0.039	XM_003587328.1-2		SAT1	spermidine/spermine N1-acetyltransferase 1	-3.13	0.041	NM_001034333.1
RAPGEF6	Rap guanine nucleotide exchange factor (GEF) 6	2.541	0.026	NM_001191172.1								LOC517126	Fc receptor-like 5	2.461	0.005	XM_003585824.1		MTF2	metal response element binding transcription factor 2	2.865	0.001	NM_001046556.1		CRAMP1L	Crm, cramped-like (Drosophila)	2.512	0.004	NM_001205874.1								NEK7	NIMA-related kinase 7	3.894	0.005	XM_002694272.2		GNB2L1	guanine nucleotide binding protein (G protein), beta polypeptide 2-like 1	-3.133	0.041	NM_175802.2
KIF5B	kinesin family member 5B	2.54	0.011	XM_003586277.1								EVI5	ecotropic viral integration site 5	2.46	0.005	XM_002686231.2		STAT4	signal transducer and activator of transcription 4	2.862	0.001	XM_002685461.1		LCLAT1	lysocardiolipin acyltransferase 1	2.506	0.004	XM_002691445.1								TRAPPC9	trafficking protein particle complex 9	3.89	0.005	NM_001037474.1		ITM2B	integral membrane protein 2B	-3.133	0.041	NM_001035093.1
SESN3	sestrin 3	2.54	0.011	NM_001192365.1								FNIP1	folliculin interacting protein 1	2.458	0.005	XM_002688971.2		DCUN1D1	DCN1, defective in cullin neddylation 1, domain containing 1 (S. cerevisiae)	2.861	0.001	NM_001102233.1		CEP85L	centrosomal protein 85kDa-like	2.491	0.004	XM_002690081.2								LOC100337091	phospholipase C, gamma 2 (phosphatidylinositol-specific)	3.887	0.005	XM_003587203.1		EMP3	epithelial membrane protein 3	-3.134	0.04	NM_001024562.1
ZZZ3	zinc finger, ZZ-type containing 3	2.539	0.011	XM_002692957.2								PDGFD	platelet derived growth factor D	2.457	0.005	NM_001083706.1		RAB4A	RAB4A, member RAS oncogene family	2.859	0.001	NM_001038685.1		MNAT1	menage a trois homolog 1, cyclin H assembly factor (Xenopus laevis)	2.488	0.004	NM_001105409.1								STK10	serine/threonine kinase 10	3.875	0.005	NM_001192627.1		OAZ1	ornithine decarboxylase antizyme 1	-3.134	0.04	NM_001127243.1
PLCL1	phospholipase C-like 1	2.534	0.011	NM_001102215.1								TNRC6B	trinucleotide repeat containing 6B	2.457	0.005	NM_001192655.1		EIF4G3	eukaryotic translation initiation factor 4 gamma, 3	2.856	0	XM_003585794.1		ADD1	adducin 1 (alpha)	2.485	0.004	NM_001205999.1								ARID5B	AT rich interactive domain 5B (MRF1-like)	3.861	0.005	XM_002698842.2		MYH9	myosin, heavy chain 9, non-muscle	-3.139	0.04	NM_001192762.1
NBEA	neurobeachin	2.532	0.005	NM_001191279.1								TUBGCP5	tubulin, gamma complex associated protein 5	2.456	0.005	NM_001102495.1		XPR1	xenotropic and polytropic retrovirus receptor 1	2.856	0.001	NM_001192883.1		PRKCH	protein kinase C, eta	2.485	0.004	NM_001076863.1								RASGRP2	RAS guanyl releasing protein 2 (calcium and DAG-regulated)	3.854	0.005	NM_001099946.1		LAPTM5	lysosomal protein transmembrane 5	-3.152	0.039	NM_001046118.1
CHM	choroideremia (Rab escort protein 1)	2.529	0.012	XM_002691752.2-1								NLK	nemo-like kinase	2.452	0.005	NM_001193253.1		RALGAPA1	Ral GTPase activating protein, alpha subunit 1 (catalytic)	2.847	0.001	XM_003587576.1		MKL2	MKL/myocardin-like 2	2.484	0.004	NM_001192293.1								MACF1	microtubule-actin crosslinking factor 1	3.848	0.006	NM_001143860.1		PTMA	prothymosin, alpha (gene sequence 28)	-3.154	0.039	XM_003585780.1
LOC523504	uncharacterized LOC523504	2.529	0.012	NM_001205389.1								POLA1	polymerase (DNA directed), alpha 1, catalytic subunit	2.451	0.005	NM_001206065.1		PDSS2	prenyl (decaprenyl) diphosphate synthase, subunit 2	2.845	0.002	NM_001100385.1		SETX	senataxin	2.482	0.004	XM_002691649.2								EXOC2	exocyst complex component 2	3.847	0.006	NM_001206159.1		MYL6	myosin, light chain 6, alkali, smooth muscle and non-muscle	-3.156	0.038	NM_175780.1
PRKCQ	protein kinase C, theta	2.523	0.012	XM_002689430.1								PPP2R5E	protein phosphatase 2, regulatory subunit B', epsilon isoform	2.448	0.005	NM_001083468.1		SLC9A9	solute carrier family 9, subfamily A (NHE9, cation proton antiporter 9), member 9	2.845	0.002	NM_001076068.1		GLMN	glomulin, FKBP associated protein	2.476	0.004	NM_001192020.1								ARHGEF7	Rho guanine nucleotide exchange factor (GEF) 7	3.844	0.006	XM_002691992.1		YBX1	Y box binding protein 1	-3.156	0.039	NM_174815.2
BRWD1	bromodomain and WD repeat domain containing 1	2.522	0.012	NM_001192077.1								ANO10	anoctamin 10	2.446	0.005	NM_001102169.1		PHC3	polyhomeotic homolog 3 (Drosophila)	2.838	0.002	NM_001192833.1		LOC100848511	ecto-NOX disulfide-thiol exchanger 1-like	2.474	0.004	XM_003588084.1								RNF216	ring finger protein 216	3.836	0.006	NM_001193258.1		LOC618220	ribosomal protein L6 pseudogene	-3.164	0.038	XR_083644.2
LOC100296333	uncharacterized LOC100296333	2.519	0.012	NM_001103174.1								SERINC5	serine incorporator 5	2.446	0.005	XM_002690460.1		PLCL1	phospholipase C-like 1	2.837	0.002	NM_001191279.1		SPATA5	spermatogenesis associated 5	2.473	0.004	XM_002694399.2								ZFYVE1	zinc finger, FYVE domain containing 1	3.835	0.006	NM_001206112.1		TIMM13	translocase of inner mitochondrial membrane 13 homolog (yeast)	-3.166	0.038	NM_001080277.1
NSMCE2	non-SMC element 2, MMS21 homolog (S. cerevisiae)	2.518	0.012	XM_002691026.1								HERC1	hect (homologous to the E6-AP (UBE3A) carboxyl terminus) domain and RCC1 (CHC1)-like domain (RLD) 1	2.441	0.005	NM_001103282.1		LOC100297914	KIAA1109 ortholog	2.834	0.018	XM_002694408.1-2		OLA1	Obg-like ATPase 1	2.47	0.004	NM_001046045.1								SCAP	SREBF chaperone	3.828	0.006	NM_001101889.1		RAC2	ras-related C3 botulinum toxin substrate 2 (rho family, small GTP binding protein Rac2)	-3.178	0.037	NM_175792.2
FBXO11	F-box protein 11	2.517	0.012	NM_001075797.1								CDK6	cyclin-dependent kinase 6	2.439	0.005	NM_001192301.1		PHTF2	putative homeodomain transcription factor 2	2.834	0.002	NM_001191316.1		KCNQ5	potassium voltage-gated channel, KQT-like subfamily, member 5	2.454	0.005	XM_002690016.2								GRIPAP1	GRIP1 associated protein 1	3.818	0.006	NM_001193106.1		SF3B2	splicing factor 3b, subunit 2, 145kDa	-3.178	0.036	NM_001103271.1
NSF	N-ethylmaleimide-sensitive factor	2.515	0.012	NM_001101894.1								SMG1	smg-1 homolog, phosphatidylinositol 3-kinase-related kinase (C. elegans)	2.438	0.005	NM_001205915.1		TMEM168	transmembrane protein 168	2.831	0.002	NM_001078031.1		TLE4	transducin-like enhancer of split 4 (E(sp1) homolog, Drosophila)	2.454	0.005	NM_001081583.1								FOXO1	forkhead box O1	3.813	0.006	XM_002691748.2		SLC4A8	solute carrier family 4, sodium bicarbonate cotransporter, member 8	-3.178	0.037	XM_002687293.2
ARHGAP12	Rho GTPase activating protein 12	2.512	0.012	XM_002696057.2								AKAP13	A kinase (PRKA) anchor protein 13	2.436	0.005	XM_002696531.2		USP40	ubiquitin specific peptidase 40	2.83	0.002	XM_002686556.1		XKR6	XK, Kell blood group complex subunit-related family, member 6	2.449	0.005	NM_001192331.1								RUNX1T1	runt-related transcription factor 1; translocated to, 1 (cyclin D-related)	3.813	0.006	NM_001099385.1		ARPC5	actin related protein 2/3 complex, subunit 5, 16kDa	-3.179	0.036	NM_001035447.1
LOC100847553	uncharacterized LOC100847553	2.509	0.012	NM_001102241.1								TMEM168	transmembrane protein 168	2.431	0.005	NM_001078031.1		SSBP2	single-stranded DNA binding protein 2	2.825	0.002	NM_001035478.1		FAM107B	family with sequence similarity 107, member B	2.446	0.005	NM_001046393.1								CDC14A	cell division cycle 14A	3.809	0.008	XM_003585862.1		EEF1B2	eukaryotic translation elongation factor 1 beta 2	-3.18	0.036	NM_001014936.1
ARAP2	ArfGAP with RhoGAP domain, ankyrin repeat and PH domain 2	2.498	0.013	XM_003586631.1								LOC100849028	uncharacterized LOC100849028	2.425	0.005	XM_003588153.1		RASSF3	Ras association (RalGDS/AF-6) domain family member 3	2.822	0.002	NM_001192886.2		SYN1	synapsin I	2.445	0.005	XM_003588170.1-2								BLNK	B-cell linker	3.793	0.007	NM_001046054.1		ENY2	enhancer of yellow 2 homolog (Drosophila)	-3.191	0.035	NM_001034747.1
ADD3	adducin 3 (gamma)	2.497	0.013	XM_002688221.2								KIAA1432	KIAA1432 ortholog	2.419	0.006	XM_003586384.1		ZNF148	zinc finger protein 148	2.822	0.002	NM_001033121.1		NSMCE2	non-SMC element 2, MMS21 homolog (S. cerevisiae)	2.443	0.005	NM_001075797.1								SNX8	sorting nexin 8	3.791	0.007	NM_001046533.1		C8H9orf80	chromosome 8 open reading frame, human C9orf80	-3.202	0.034	NM_001078064.1
PCNX	pecanex homolog (Drosophila)	2.485	0.014	NM_001075194.1								MOB2	MOB kinase activator 2	2.418	0.006	NM_001099732.1		INPP4B	inositol polyphosphate-4-phosphatase, type II, 105kDa	2.818	0.002	XM_002694335.2		MTMR3	myotubularin related protein 3	2.442	0.005	NM_001081605.1								WRAP53	WD repeat containing, antisense to TP53	3.789	0.007	NM_001035073.1		LOC100296121	zinc finger protein 132-like	-3.205	0.034	XM_002695444.2
RBMS1	RNA binding motif, single stranded interacting protein 1	2.485	0.014	XM_002691050.1								KIAA1432	KIAA1432 ortholog	2.417	0.006	XM_002689601.1		INPP4B	inositol polyphosphate-4-phosphatase, type II, 105kDa	2.818	0.002	XM_003587123.1		EIF4G3	eukaryotic translation initiation factor 4 gamma, 3	2.441	0	XM_003585794.1								SELO	selenoprotein O	3.784	0.007	NM_001163193.1		RPL3	ribosomal protein L3	-3.212	0.034	NM_174715.1
FYN	FYN oncogene related to SRC, FGR, YES	2.482	0.014	NM_001035361.1								ZDHHC17	zinc finger, DHHC-type containing 17	2.417	0.006	NM_001206069.1		PCBP3	poly(rC) binding protein 3	2.815	0.002	NM_001076284.1		TCF4	transcription factor 4	2.436	0.005	NM_001034621.1								NFYC	nuclear transcription factor Y, gamma	3.774	0.007	NM_001034598.1		RPS3A	ribosomal protein S3A	-3.219	0.033	NM_001034038.1
STK4	serine/threonine kinase 4	2.479	0.014	NM_001077972.1								STX2	syntaxin 2	2.4	0.006	XM_002694458.2		FCRL3	Fc receptor-like 3	2.813	0.002	XM_002685955.1		NAF1	nuclear assembly factor 1 homolog (S. cerevisiae)	2.433	0.005	XM_003586172.1								RBM33	RNA binding motif protein 33	3.771	0.007	XM_002686984.1		ACTG1	actin, gamma 1	-3.245	0.031	NM_001033618.1
PAN3	PAN3 poly(A) specific ribonuclease subunit homolog (S. cerevisiae)	2.475	0.014	NM_001015602.1								PARN	poly(A)-specific ribonuclease	2.396	0.006	NM_001101118.1		LOC516599	tripartite motif containing 5-like	2.804	0.002	XM_002693205.1		ZNRF1	zinc and ring finger 1	2.431	0.005	NM_001192210.1								HTT	huntingtin	3.764	0.007	XM_002688430.1		LOC781576	mCG1723-like	-3.253	0.029	XM_003585885.1
SCAP	SREBF chaperone	2.475	0.014	XM_003586703.1								FAM49B	family with sequence similarity 49, member B	2.395	0.006	NM_001046047.1		PDE3B	phosphodiesterase 3B, cGMP-inhibited	2.802	0.002	XM_002693045.2		LOC100848671	uncharacterized LOC100848671	2.429	0.005	XM_003586038.1								RBM14	RNA binding motif protein 14	3.761	0.007	NM_001014901.1		CDKN2D	cyclin-dependent kinase inhibitor 2D (p19, inhibits CDK4)	-3.261	0.03	NM_001046050.1
AKAP13	A kinase (PRKA) anchor protein 13	2.472	0.014	NM_001101889.1								ARID1B	AT rich interactive domain 1B (SWI1-like)	2.392	0.006	XM_002690360.2		LOC100848984	uncharacterized LOC100848984	2.801	0.002	XR_139265.1		WASL	Wiskott-Aldrich syndrome-like	2.428	0.005	NM_174219.2								RYBP	RING1 and YY1 binding protein	3.747	0.007	XM_002696972.2		LOC614922	heterogeneous nuclear ribonucleoprotein A1 pseudogene	-3.261	0.03	XM_003586990.1
DENND1B	DENN/MADD domain containing 1B	2.467	0.015	XM_002696531.2								SLC9A7	solute carrier family 9, subfamily A (NHE7, cation proton antiporter 7), member 7	2.392	0.006	XM_002700063.1		LOC100848984	uncharacterized LOC100848984	2.801	0.002	XR_139266.1		ARHGAP24	Rho GTPase activating protein 24	2.424	0.005	NM_001102234.1								CDS2	CDP-diacylglycerol synthase (phosphatidate cytidylyltransferase) 2	3.744	0.008	NM_001078046.1		LOC613519	ribosomal protein L3 pseudogene	-3.274	0.029	XR_083776.2
SUCLG2	succinate-CoA ligase, GDP-forming, beta subunit	2.466	0.015	XM_002694231.2								ACSL5	acyl-CoA synthetase long-chain family member 5	2.39	0.006	NM_001075650.1		ZDHHC17	zinc finger, DHHC-type containing 17	2.801	0.002	NM_001206069.1		LOC100296620	uncharacterized LOC100296620	2.416	0.005	XM_002684648.2								CDC14A	cell division cycle 14A	3.743	0.006	XM_002686168.1		LOC100847602	uncharacterized LOC100847602	-3.275	0.029	XR_139313.1
C6H4orf21	zinc finger, GRF-type containing 1	2.462	0.015	NM_001034639.1								C18H16orf87	chromosome 18 open reading frame, human C16orf87	2.378	0.007	NM_001078045.1		RASAL2	RAS protein activator like 2	2.8	0.002	XM_002694157.2		C8H9orf3	chromosome 8 open reading frame, human C9orf3	2.413	0.006	NM_001206980.1								LOC100847692	Sad1 and UNC84 domain containing 1	3.743	0.008	XM_003587860.1		RPS17	ribosomal protein S17	-3.277	0.029	NM_001099210.1
CNOT4	CCR4-NOT transcription complex, subunit 4	2.459	0.015	XM_002688075.1								HDAC8	histone deacetylase 8	2.378	0.007	NM_001076231.1		MAGI3	membrane associated guanylate kinase, WW and PDZ domain containing 3	2.796	0.002	NM_001192746.1		NAV3	neuron navigator 3	2.412	0.006	NM_001192669.2								TLE4	transducin-like enhancer of split 4 (E(sp1) homolog, Drosophila)	3.739	0.008	NM_001081583.1		RPL6	ribosomal protein L6	-3.28	0.029	NM_001031756.1
NIPAL1	NIPA-like domain containing 1	2.458	0.015	NM_001035432.1								C11H2orf3	GC-rich sequence DNA-binding factor 2	2.374	0.007	XM_003586634.1		MALT1	mucosa associated lymphoid tissue lymphoma translocation gene 1	2.796	0.002	XM_002697836.2		IP6K1	inositol hexakisphosphate kinase 1	2.409	0.006	NM_001076010.1								MGMT	O-6-methylguanine-DNA methyltransferase	3.723	0.008	XM_002698584.1		LOC781576	mCG1723-like	-3.281	0.03	XM_003585884.1
PUM1	pumilio homolog 1 (Drosophila)	2.458	0.015	NM_001192302.1								VPS8	vacuolar protein sorting 8 homolog (S. cerevisiae)	2.374	0.007	XM_002684849.2		FUT8	fucosyltransferase 8 (alpha (1,6) fucosyltransferase)	2.792	0.002	NM_177501.2		SP140	SP140 nuclear body protein	2.408	0.006	NM_001075447.1								LOC100847895	uncharacterized LOC100847895	3.713	0.008	XR_139478.1		WDR1	WD repeat domain 1	-3.289	0.028	NM_001046346.1
FNDC3A	fibronectin type III domain containing 3A	2.457	0.015	NM_001193123.1								LOC535946	KAT8 regulatory NSL complex subunit 1	2.371	0.007	XM_003587457.1		C23H6orf106	chromosome 23 open reading frame, human C6orf106	2.789	0.002	NM_001076471.1		C25H16orf52	chromosome 25 open reading frame, human C16orf52	2.404	0.006	XM_002697989.2								EBF1	early B-cell factor 1	3.704	0.008	NM_001192916.1		RPS15	ribosomal protein S15	-3.291	0.028	NM_001024541.1
PDGFD	platelet derived growth factor D	2.457	0.015	NM_001205646.1								RHEB	Ras homolog enriched in brain	2.371	0.007	NM_001031764.1		XRCC4	X-ray repair complementing defective repair in Chinese hamster cells 4	2.789	0.002	NM_001081615.1		CDK13	cyclin-dependent kinase 13	2.404	0.002	NM_001205431.1								NFATC2	nuclear factor of activated T-cells, cytoplasmic, calcineurin-dependent 2	3.704	0.008	XM_002692357.1		GRK6	G protein-coupled receptor kinase 6	-3.292	0.028	NM_001191530.1
SUGT1	SGT1, suppressor of G2 allele of SKP1 (S. cerevisiae)	2.452	0.015	NM_001083706.1								SPPL3	signal peptide peptidase like 3	2.371	0.007	XM_002694525.2		PHKB	phosphorylase kinase, beta	2.787	0.002	XM_002694773.2		EVI5	ecotropic viral integration site 5	2.397	0.006	XM_002686231.2								OGDH	oxoglutarate (alpha-ketoglutarate) dehydrogenase (lipoamide)	3.704	0.008	NM_001076030.1		HMGN2	high mobility group nucleosomal binding domain 2	-3.293	0.028	NM_001098945.1
CRAMP1L	Crm, cramped-like (Drosophila)	2.451	0.015	NM_001046203.1								C25H16orf52	chromosome 25 open reading frame, human C16orf52	2.369	0.007	XM_002697989.2		OLA1	Obg-like ATPase 1	2.784	0.002	NM_001046045.1		RUNX1	runt-related transcription factor 1	2.396	0.006	XM_002685147.2								MALT1	mucosa associated lymphoid tissue lymphoma translocation gene 1	3.701	0.008	XM_002697836.2		RPL9	ribosomal protein L9	-3.294	0.028	NM_001024469.2
CDC42SE2	CDC42 small effector 2	2.444	0.016	NM_001205874.1								LIN54	lin-54 homolog (C. elegans)	2.365	0.007	NM_001205481.1		ANKRD44	ankyrin repeat domain 44	2.779	0.002	XM_003585758.1		RSBN1L	round spermatid basic protein 1-like	2.393	0.006	XM_002686750.1								C26H10orf76	chromosome 26 open reading frame, human C10orf76	3.698	0.009	XM_002698448.1		EIF4B	eukaryotic translation initiation factor 4B	-3.296	0.028	NM_001035028.1
MLLT3	myeloid/lymphoid or mixed-lineage leukemia (trithorax homolog, Drosophila); translocated to, 3	2.443	0.016	NM_001102537.1								GBE1	glucan (1,4-alpha-), branching enzyme 1	2.361	0.007	NM_001122729.1		GPHN	gephyrin	2.777	0.002	XM_003586590.1		HDAC9	histone deacetylase 9	2.391	0.012	XM_003585945.1								FAM196B	family with sequence similarity 196, member B	3.696	0.009	XM_002696247.1		LDB1	LIM domain binding 1	-3.3	0.028	XM_002698449.2
IFI16	interferon, gamma-inducible protein 16	2.441	0.016	NM_001192549.1								KYNU	kynureninase	2.357	0.007	NM_001191308.1		RASAL2	RAS protein activator like 2	2.773	0.002	XM_003587091.1		HDAC9	histone deacetylase 9	2.391	0.012	XM_003585947.1								VPRBP	Vpr (HIV-1) binding protein	3.696	0.009	XM_002697028.2		TUBA1A	tubulin, alpha 1a	-3.301	0.028	NM_001166505.1
ARIH1	ariadne homolog, ubiquitin-conjugating enzyme E2 binding protein, 1 (Drosophila)	2.44	0.016	XM_002685877.1								DIP2B	DIP2 disco-interacting protein 2 homolog B (Drosophila)	2.354	0.007	NM_001192309.1		CHD1L	chromodomain helicase DNA binding protein 1-like	2.768	0.002	NM_001037820.1		SRGAP2	SLIT-ROBO Rho GTPase activating protein 2	2.39	0.006	NM_001205865.1								NSMCE2	non-SMC element 2, MMS21 homolog (S. cerevisiae)	3.693	0.009	NM_001075797.1		HSPE1	heat shock 10kDa protein 1 (chaperonin 10)	-3.303	0.028	NM_174346.2
SLC9A9	solute carrier family 9, subfamily A (NHE9, cation proton antiporter 9), member 9	2.44	0.016	NM_001081714.1								MAP3K5	mitogen-activated protein kinase kinase kinase 5	2.354	0.007	NM_001144081.1		DISP1	dispatched homolog 1 (Drosophila)	2.767	0.002	NM_001038161.1		HMBOX1	homeobox containing 1	2.384	0.006	NM_001192171.1								MOB2	MOB kinase activator 2	3.692	0.009	NM_001099732.1		RPL10A	ribosomal protein L10a	-3.31	0.028	NM_001015647.1
CDK13	cyclin-dependent kinase 13	2.439	0.025	NM_001076068.1								PACSIN2	protein kinase C and casein kinase substrate in neurons 2	2.352	0.007	NM_001046468.1		LCORL	ligand dependent nuclear receptor corepressor-like	2.763	0.002	NM_001192357.1		SP140L	SP140 nuclear body protein-like	2.383	0.006	NM_001130765.1								MTSS1	metastasis suppressor 1	3.692	0.009	NM_001192581.1		IER2	immediate early response 2	-3.314	0.027	NM_001075871.1
VPS54	vacuolar protein sorting 54 homolog (S. cerevisiae)	2.438	0.016	NM_001206622.1								TBC1D9	TBC1 domain family, member 9 (with GRAM domain)	2.349	0.007	XM_002694365.2		ASXL1	additional sex combs like 1 (Drosophila)	2.759	0.002	XM_002692288.1		EBF1	early B-cell factor 1	2.381	0.006	NM_001192916.1								LOC100847196	uncharacterized LOC100847196	3.691	0.009	XM_003587477.1		TMED9	transmembrane emp24 protein transport domain containing 9	-3.318	0.027	NM_001034812.1
LOC100296943	uncharacterized LOC100296943	2.435	0.016	NM_001105460.1								DDX10	DEAD (Asp-Glu-Ala-Asp) box polypeptide 10	2.347	0.008	NM_001076881.1		SMC5	structural maintenance of chromosomes 5	2.757	0.002	XM_002689640.2		HERC2	HECT and RLD domain containing E3 ubiquitin protein ligase 2	2.381	0.006	NM_001206081.1								MED12	mediator complex subunit 12	3.691	0.009	NM_001205878.1		DAD1	defender against cell death 1	-3.324	0.027	NM_001034761.1
DLG1	discs, large homolog 1 (Drosophila)	2.433	0.016	XM_002690187.1								DYM	dymeclin	2.347	0.008	NM_001192999.1		LOC528994	eva-1 homolog A (C. elegans)	2.756	0.002	XM_002691274.1		UBAC2	UBA domain containing 2	2.38	0.006	NM_001103344.1								STK19	serine/threonine kinase 19	3.69	0.009	NM_001097997.1		IER5	immediate early response 5	-3.33	0.027	XM_002694216.2
RBM6	RNA binding motif protein 6	2.433	0.016	XM_002684855.2								KIAA1370	KIAA1370 ortholog	2.345	0.008	XM_002690921.2		ATXN2	ataxin 2	2.752	0.002	XM_002694500.1		SLC23A2	solute carrier family 23 (nucleobase transporters), member 2	2.378	0.006	NM_001205430.1								ZMYND8	zinc finger, MYND-type containing 8	3.69	0.009	NM_001191171.1		LOC100848193	uncharacterized LOC100848193	-3.332	0.027	XM_003587667.1
LOC510083	dedicator of cytokinesis 2	2.432	0.016	XM_002697034.1								RFTN1	raftlin, lipid raft linker 1	2.344	0.008	XM_002685189.1		PRKACB	protein kinase, cAMP-dependent, catalytic, beta	2.751	0.002	NM_174585.2		OSBPL10	oxysterol binding protein-like 10	2.377	0.006	XM_002696885.2								TNFAIP8	tumor necrosis factor, alpha-induced protein 8	3.686	0.009	NM_001083711.1		CDH23	cadherin-related 23	-3.338	0.026	NM_001191206.1
ZNF608	zinc finger protein 608	2.426	0.017	XM_003587495.1								PION	pigeon homolog (Drosophila)	2.343	0.008	NM_001193061.1		GNG2	guanine nucleotide binding protein (G protein), gamma 2	2.75	0.002	NM_174072.3		OSBPL10	oxysterol binding protein-like 10	2.377	0.006	XM_003587607.1								LOC788113	Snf2-related CREBBP activator protein	3.684	0.009	XM_003587832.1		LOC100848780	uncharacterized LOC100848780	-3.338	0.026	XM_003586094.1
TLK1	tousled-like kinase 1	2.426	0.04	NM_001206306.1								TRIT1	tRNA isopentenyltransferase 1	2.34	0.008	NM_001192840.1		ETV6	ets variant 6	2.748	0.002	NM_001015514.2		TAF1	TAF1 RNA polymerase II, TATA box binding protein (TBP)-associated factor, 250kDa	2.377	0.006	XM_002700041.1								FCRL1	Fc receptor-like 1	3.675	0.009	NM_001102045.1		OST4	oligosaccharyltransferase 4 homolog (S. cerevisiae)	-3.339	0.026	XM_002691457.1
C5H12orf35	chromosome 5 open reading frame, human C12orf35	2.424	0.017	XM_002685281.2								CD86	CD86 molecule	2.339	0.008	NM_001038017.1		PAPD4	PAP associated domain containing 4	2.747	0.002	NM_001046361.1		C1H3orf26	cms1 ribosomal small subunit homolog (yeast)	2.376	0.006	NM_001038215.1								AFF1	AF4/FMR2 family, member 1	3.673	0.009	NM_001191525.1		LOC100847811	60S ribosomal protein L24-like	-3.341	0.026	XR_139700.1
DNAH7	dynein, axonemal, heavy chain 7	2.42	0.017	NM_001101072.1								LOC510083	dedicator of cytokinesis 2	2.338	0.008	XM_003587495.1		PIP4K2A	phosphatidylinositol-5-phosphate 4-kinase, type II, alpha	2.744	0.002	NM_001192769.1		SERGEF	secretion regulating guanine nucleotide exchange factor	2.374	0.006	NM_001076021.1								KSR1	kinase suppressor of ras 1	3.668	0.009	XM_002695662.1		FAU	Finkel-Biskis-Reilly murine sarcoma virus (FBR-MuSV) ubiquitously expressed	-3.343	0.026	NM_174731.3
ITPR1	inositol 1,4,5-trisphosphate receptor, type 1	2.42	0.017	NM_001143874.1								GPHN	gephyrin	2.336	0.008	XM_003586590.1		SLC16A10	solute carrier family 16, member 10 (aromatic amino acid transporter)	2.742	0.002	NM_001192847.1		RLF	rearranged L-myc fusion	2.372	0.007	NM_001205939.1								PIP4K2A	phosphatidylinositol-5-phosphate 4-kinase, type II, alpha	3.66	0.009	NM_001192769.1		GRTP1	growth hormone regulated TBC protein 1	-3.346	0.026	NM_001103336.1
OLA1	Obg-like ATPase 1	2.416	0.017	NM_174841.2								TLE4	transducin-like enhancer of split 4 (E(sp1) homolog, Drosophila)	2.335	0.008	NM_001081583.1		UHRF2	ubiquitin-like with PHD and ring finger domains 2	2.741	0.002	NM_001102270.1		FAM190B	family with sequence similarity 190, member B	2.368	0.009	XM_003587997.1								RCOR1	REST corepressor 1	3.658	0.01	XM_002696778.1		TMBIM4	transmembrane BAX inhibitor motif containing 4	-3.347	0.026	NM_001014914.2
INPP4B	inositol polyphosphate-4-phosphatase, type II, 105kDa	2.414	0.017	NM_001046045.1								RAF1	v-raf-1 murine leukemia viral oncogene homolog 1	2.334	0.008	NM_001102505.1		CBLB	Cas-Br-M (murine) ecotropic retroviral transforming sequence b	2.74	0.002	NM_001205923.1		CNNM3	cyclin M3	2.365	0.007	XM_002691165.2								SLC43A2	solute carrier family 43, member 2	3.655	0.01	NM_001075546.1		CALM3	calmodulin 3 (phosphorylase kinase, delta)	-3.351	0.026	NM_001046249.1
PTPLB	protein tyrosine phosphatase-like (proline instead of catalytic arginine), member b	2.414	0.017	XM_003587123.1								ZNF407	zinc finger protein 407	2.334	0.008	XM_002697658.1		LOC100848544	uncharacterized LOC100848544	2.739	0.002	XR_139291.1		KDM4C	lysine (K)-specific demethylase 4C	2.362	0.007	XM_002689595.2								SLC38A10	solute carrier family 38, member 10	3.651	0.01	XM_003587471.1		LOC100848406	uncharacterized LOC100848406	-3.358	0.025	XR_139406.1
ZNF565	zinc finger protein 565	2.414	0.017	NM_001130757.1								ELMO1	engulfment and cell motility 1	2.333	0.046	NM_001113227.1		PHF8	PHD finger protein 8	2.739	0.003	XM_003588182.1		TFCP2	transcription factor CP2	2.359	0.007	NM_001083397.1								MAP3K3	mitogen-activated protein kinase kinase kinase 3	3.65	0.01	XM_002696094.2		LOC100848406	uncharacterized LOC100848406	-3.362	0.025	XR_139405.1
BLNK	B-cell linker	2.41	0.018	NM_001102216.1								CSNK1G1	casein kinase 1, gamma 1	2.331	0.008	NM_001038146.1		EXOC6B	exocyst complex component 6B	2.729	0.002	NM_001076416.1		HIBCH	3-hydroxyisobutyryl-CoA hydrolase	2.355	0.007	NM_001046413.1								TSPAN5	tetraspanin 5	3.65	0.01	NM_001076119.1		ACSL3	acyl-CoA synthetase long-chain family member 3	-3.372	0.025	NM_001205468.1
NLK	nemo-like kinase	2.409	0.018	NM_001046054.1								GNAQ	guanine nucleotide binding protein (G protein), q polypeptide	2.33	0.008	NM_001110002.1		KIAA1328	KIAA1328 ortholog	2.729	0.002	XM_002697675.1		DLG1	discs, large homolog 1 (Drosophila)	2.353	0.007	XM_002684855.2								UQCC	ubiquinol-cytochrome c reductase complex chaperone	3.645	0.01	NM_001076508.1		PJA2	praja ring finger 2	-3.374	0.025	NM_001100340.1
SFMBT2	Scm-like with four mbt domains 2	2.408	0.018	NM_001193253.1								ARHGAP15	Rho GTPase activating protein 15	2.329	0.008	NM_001105003.1		ANGPTL1	angiopoietin-like 1	2.726	0.003	NM_001075426.1		FANCC	Fanconi anemia, complementation group C	2.346	0.003	NM_174316.2-2								EIF4G3	eukaryotic translation initiation factor 4 gamma, 3	3.644	0.01	XM_003585796.1		ATP6V0C	ATPase, H+ transporting, lysosomal 16kDa, V0 subunit c	-3.385	0.024	NM_001017954.1
PHTF2	putative homeodomain transcription factor 2	2.406	0.018	NM_001205956.1								ATXN7L1	ataxin 7-like 1	2.329	0.012	NM_001166367.1		BACH2	BTB and CNC homology 1, basic leucine zipper transcription factor 2	2.722	0.003	XM_002690189.1		FAF1	Fas (TNFRSF6) associated factor 1	2.343	0.007	NM_001046318.1								FAM102A	family with sequence similarity 102, member A	3.642	0.01	NM_001193094.1		RPL8	ribosomal protein L8	-3.399	0.023	NM_001034625.1
CRLF3	cytokine receptor-like factor 3	2.405	0.018	NM_001191316.1								SP140L	SP140 nuclear body protein-like	2.326	0.008	NM_001130765.1		SENP7	sentrin-specific protease 7-like	2.719	0.003	NM_001101888.1		TFB1M	transcription factor B1, mitochondrial	2.34	0.007	NM_001076896.2								C4H7orf30	mitochondrial assembly of ribosomal large subunit 1	3.634	0.01	NM_001075398.1		RPL26	ribosomal protein L26	-3.414	0.023	NM_001015512.2
REPS1	RALBP1 associated Eps domain containing 1	2.404	0.018	NM_001192650.1								MAU2	MAU2 chromatid cohesion factor homolog (C. elegans)	2.325	0.008	XM_002688519.2		HERC4	HECT and RLD domain containing E3 ubiquitin protein ligase 4	2.716	0.003	NM_001076894.2		UBE2E3	ubiquitin-conjugating enzyme E2E 3	2.336	0.008	NM_001079783.1								CARS	cysteinyl-tRNA synthetase	3.634	0.01	NM_001103249.1		RPLP0	ribosomal protein, large, P0	-3.415	0.023	NM_001012682.1
TMEM135	transmembrane protein 135	2.404	0.018	NM_001193011.1								ARHGAP26	Rho GTPase activating protein 26	2.324	0.008	NM_001205522.1-1		DOCK10	dedicator of cytokinesis 10	2.712	0.003	NM_001191273.2		SRSF4	serine/arginine-rich splicing factor 4	2.332	0.008	NM_001101231.1								SP140	SP140 nuclear body protein	3.631	0.01	NM_001075447.1		RPS4X	ribosomal protein S4, X-linked	-3.427	0.022	NM_001035445.1
ARHGAP15	Rho GTPase activating protein 15	2.402	0.018	NM_001035348.1								LRRC18	leucine rich repeat containing 18	2.324	0.008	NM_001077058.1		STIM2	stromal interaction molecule 2	2.712	0.003	XM_002688161.2		LOC100847374	uncharacterized LOC100847374	2.331	0.008	XR_139227.1								SLC10A1	solute carrier family 10 (sodium/bile acid cotransporter family), member 1	3.626	0.01	NM_001046339.1		LTB	lymphotoxin beta (TNF superfamily, member 3)	-3.429	0.022	XM_002697371.1
DTNB	dystrobrevin, beta	2.399	0.018	NM_001105003.1								PRKCH	protein kinase C, eta	2.324	0.008	NM_001076863.1		SUCLG2	succinate-CoA ligase, GDP-forming, beta subunit	2.707	0.003	NM_001034639.1		ZDHHC17	zinc finger, DHHC-type containing 17	2.328	0.008	NM_001206069.1								LOC100849042	phosphodiesterase 7A	3.625	0.01	XM_003586888.1		PSME1	proteasome (prosome, macropain) activator subunit 1 (PA28 alpha)	-3.43	0.022	NM_001024509.2
SND1	staphylococcal nuclease and tudor domain containing 1	2.395	0.018	NM_001192800.1								LOC785419	upstream binding protein 1 (LBP-1a)	2.322	0.008	XM_003587609.1		RPAP2	RNA polymerase II associated protein 2	2.706	0.003	NM_001103266.1		RBM6	RNA binding motif protein 6	2.327	0.008	XM_002697034.1								TBC1D5	TBC1 domain family, member 5	3.625	0.01	NM_001205489.1		LOC784243	ribosomal protein L34 pseudogene	-3.439	0.022	XR_139437.1
SP140	SP140 nuclear body protein	2.395	0.018	NM_205784.1								RERE	arginine-glutamic acid dipeptide (RE) repeats	2.321	0.008	XM_002694049.1		ACBD6	acyl-CoA binding domain containing 6	2.705	0.003	NM_001083783.1		KDM6A	lysine (K)-specific demethylase 6A	2.324	0.008	NM_001206575.1								GLYR1	glyoxylate reductase 1 homolog (Arabidopsis)	3.611	0.011	NM_001040568.2		SSR2	signal sequence receptor, beta (translocon-associated protein beta)	-3.445	0.021	NM_001015533.1
LOC507055	guanylate binding protein 4-like	2.392	0.018	NM_001075447.1								CBLB	Cas-Br-M (murine) ecotropic retroviral transforming sequence b	2.32	0.008	NM_001205923.1		FNDC3A	fibronectin type III domain containing 3A	2.705	0.003	NM_001205646.1		PPHLN1	periphilin 1	2.322	0.008	NM_001075972.1								FAM117A	family with sequence similarity 117, member A	3.61	0.011	NM_001101070.1		SUN2	Sad1 and UNC84 domain containing 2	-3.447	0.021	NM_001102319.1
MKL2	MKL/myocardin-like 2	2.389	0.019	XM_002686269.2								CRAMP1L	Crm, cramped-like (Drosophila)	2.319	0.008	NM_001205874.1		NFATC3	nuclear factor of activated T-cells, cytoplasmic, calcineurin-dependent 3	2.704	0.003	NM_001192831.1		SMAP1	small ArfGAP 1	2.322	0.008	XM_002690007.2								C23H6orf106	chromosome 23 open reading frame, human C6orf106	3.608	0.011	NM_001076471.1		LOC100847354	uncharacterized LOC100847354	-3.454	0.021	XM_003587372.1
PRKACB	protein kinase, cAMP-dependent, catalytic, beta	2.389	0.019	NM_001192293.1								OSBPL10	oxysterol binding protein-like 10	2.314	0.009	XM_002696885.2		RALY	RNA binding protein, autoantigenic (hnRNP-associated with lethal yellow homolog (mouse))	2.699	0.003	NM_001014847.1		NUBPL	nucleotide binding protein-like	2.319	0.008	NM_001193042.1								COPG2	coatomer protein complex, subunit gamma 2	3.606	0.011	NM_001082448.1		APEX1	APEX nuclease (multifunctional DNA repair enzyme) 1	-3.465	0.02	NM_176609.3
SPTLC2	serine palmitoyltransferase, long chain base subunit 2	2.388	0.019	NM_174585.2								XPO5	exportin 5	2.311	0.009	XM_002697301.1		C13H20orf196	chromosome 13 open reading frame, human C20orf196	2.697	0.003	NM_001046552.1		MTF2	metal response element binding transcription factor 2	2.317	0.008	NM_001046556.1								SGMS1	sphingomyelin synthase 1	3.606	0.011	NM_001206135.1		LOC784572	suppressor of Ty 20 homolog (S. cerevisiae)	-3.469	0.02	XM_002700336.1
UIMC1	ubiquitin interaction motif containing 1	2.386	0.019	NM_001099081.1								VKORC1L1	vitamin K epoxide reductase complex, subunit 1-like 1	2.31	0.009	XM_002698075.2		RBM6	RNA binding motif protein 6	2.692	0.003	XM_002697034.1		FAM35A	family with sequence similarity 35, member A	2.316	0.008	XM_002698944.2								C5H12orf62	COX14 cytochrome c oxidase assembly homolog (S. cerevisiae)	3.601	0.011	NM_001195064.1		LOC782021	ribosomal protein L21 pseudogene	-3.484	0.02	XR_084028.1
ADD1	adducin 1 (alpha)	2.383	0.019	NM_001113222.1								GRAMD3	GRAM domain containing 3	2.308	0.009	NM_001079579.1		C2H2orf88	small membrane A-kinase anchor protein	2.681	0.003	NM_001076991.1		ATXN7L1	ataxin 7-like 1	2.315	0.015	NM_001035407.2								SLCO3A1	solute carrier organic anion transporter family, member 3A1	3.598	0.011	NM_001001134.1		WDR31	WD repeat domain 31	-3.49	0.019	XM_002689937.2
YWHAZ	tyrosine 3-monooxygenase/tryptophan 5-monooxygenase activation protein, zeta polypeptide	2.38	0.019	NM_001205999.1								SMG6	smg-6 homolog, nonsense mediated mRNA decay factor (C. elegans)	2.303	0.009	NM_001205827.1		PHF8	PHD finger protein 8	2.68	0.002	XM_002700122.2		TNFSF10	tumor necrosis factor (ligand) superfamily, member 10	2.312	0.008	XM_002684917.1								CLEC16A	C-type lectin domain family 16, member A	3.597	0.011	XM_002697893.1		NEDD8	neural precursor cell expressed, developmentally down-regulated 8	-3.495	0.019	NM_174764.3
PRKD3	protein kinase D3	2.378	0.019	NM_174814.2								CAMK1D	calcium/calmodulin-dependent protein kinase ID	2.302	0.009	XM_002692061.2		COA5	cytochrome c oxidase assembly factor 5	2.676	0.003	NM_001195024.1		EML4	echinoderm microtubule associated protein like 4	2.308	0.008	NM_001193054.1								SMAP1	small ArfGAP 1	3.589	0.011	XM_002690007.2		PRKAR2A	protein kinase, cAMP-dependent, regulatory, type II, alpha	-3.499	0.019	NM_001191367.1
RCOR1	REST corepressor 1	2.377	0.019	NM_001205538.1								NFKB1	nuclear factor of kappa light polypeptide gene enhancer in B-cells 1	2.302	0.009	NM_001076409.1		ZCCHC11	terminal uridylyltransferase 4-like	2.673	0.003	NM_001206930.1		SMURF1	SMAD specific E3 ubiquitin protein ligase 1	2.306	0.009	XM_002698145.2								COA5	cytochrome c oxidase assembly factor 5	3.584	0.012	NM_001195024.1		LOC100296205	ribosomal protein L36 pseudogene	-3.502	0.019	XR_083670.2
RAPGEF6	Rap guanine nucleotide exchange factor (GEF) 6	2.377	0.026	XM_002696778.1								KIAA0922	KIAA0922 ortholog	2.3	0.009	NM_001076803.1		BBX	bobby sox homolog (Drosophila)	2.672	0.003	NM_001192759.1		WDR70	WD repeat domain 70	2.306	0.009	NM_001076238.1								FARS2	phenylalanyl-tRNA synthetase 2, mitochondrial	3.58	0.012	NM_001076805.1		RPL23	ribosomal protein L23	-3.51	0.019	NM_001035014.1
ASB3	ankyrin repeat and SOCS box containing 3	2.376	0.019	XM_002688966.2								LOC615842	Alport syndrome, mental retardation, midface hypoplasia and elliptocytosis chromosomal region gene 1	2.297	0.009	XM_003588138.1		STIM1	stromal interaction molecule 1	2.671	0.003	NM_001035409.1		ARIH2	ariadne homolog 2 (Drosophila)	2.304	0.009	NM_001206242.1								HDHD1	haloacid dehalogenase-like hydrolase domain containing 1	3.577	0.012	NM_001046595.1		RPS5	ribosomal protein S5	-3.51	0.019	NM_001015531.1
RAPGEF6	Rap guanine nucleotide exchange factor (GEF) 6	2.376	0.019	NM_001076927.1								KLHL3	kelch-like family member 3	2.296	0.009	XM_002689207.2		PRKD3	protein kinase D3	2.668	0.003	NM_001205538.1		TMEM135	transmembrane protein 135	2.303	0.009	NM_001035348.1								MINOS1	mitochondrial inner membrane organizing system 1	3.572	0.012	XM_003585800.1		CHCHD2	coiled-coil-helix-coiled-coil-helix domain containing 2	-3.512	0.018	NM_001034746.1
CDKAL1	CDK5 regulatory subunit associated protein 1-like 1	2.375	0.019	XM_003586276.1								LOC533821	tyrosine-protein kinase SgK223-like	2.296	0.009	XM_003587956.1		KYNU	kynureninase	2.666	0.003	NM_001191308.1		PEX1	peroxisomal biogenesis factor 1	2.302	0.009	NM_001192071.1-1								MLLT6	myeloid/lymphoid or mixed-lineage leukemia (trithorax homolog, Drosophila); translocated to, 6	3.571	0.012	XM_002695924.2		RPL31	ribosomal protein L31	-3.519	0.018	NM_001025341.2
FBXL20	F-box and leucine-rich repeat protein 20	2.374	0.019	NM_001192691.1								LOC100335867	uncharacterized LOC100335867	2.295	0.009	XM_002692145.1		NAF1	nuclear assembly factor 1 homolog (S. cerevisiae)	2.661	0.003	XM_003586172.1		FAM190B	family with sequence similarity 190, member B	2.301	0.007	XM_002698895.2								FAM65B	family with sequence similarity 65, member B	3.567	0.012	NM_001035425.1		RPL21	ribosomal protein L21	-3.524	0.018	NM_001191412.1
UBE2D2	ubiquitin-conjugating enzyme E2D 2	2.371	0.02	NM_001035096.1								RPTOR	regulatory associated protein of MTOR, complex 1	2.294	0.009	NM_001192130.1		KDM4C	lysine (K)-specific demethylase 4C	2.659	0.003	XM_002689595.2		RTN3	reticulon 3	2.3	0.009	NM_182657.1								RAF1	v-raf-1 murine leukemia viral oncogene homolog 1	3.566	0.012	NM_001102505.1		LDHB	lactate dehydrogenase B	-3.526	0.018	NM_174100.1
VPS8	vacuolar protein sorting 8 homolog (S. cerevisiae)	2.369	0.02	NM_001046496.1								RSRC1	arginine/serine-rich coiled-coil 1	2.293	0.009	NM_001075404.1		EXOC6	exocyst complex component 6	2.658	0.003	NM_001101885.1		C8H9orf82	chromosome 8 open reading frame, human C9orf82	2.298	0.009	NM_001038120.1								VPS72	vacuolar protein sorting 72 homolog (S. cerevisiae)	3.56	0.012	NM_001015658.1		LOC100337215	peptidylprolyl isomerase A (cyclophilin A)-like	-3.54	0.017	XM_002690515.2
VPS8	vacuolar protein sorting 8 homolog (S. cerevisiae)	2.369	0.02	XM_002684849.2								PAN3	PAN3 poly(A) specific ribonuclease subunit homolog (S. cerevisiae)	2.289	0.01	XM_003586703.1		UBE2CBP	ubiquitin-conjugating enzyme E2C binding protein	2.658	0.003	NM_001075711.1		LOC100847196	uncharacterized LOC100847196	2.295	0.009	XM_003587477.1								ATXN7L1	ataxin 7-like 1	3.559	0.003	NM_001035407.2		LOC100848913	uncharacterized LOC100848913	-3.541	0.017	XR_139376.1
ANKRD44	ankyrin repeat domain 44	2.368	0.02	XM_003585662.1								MBNL1	muscleblind-like splicing regulator 1	2.288	0.01	NM_001099725.1		PHIP	pleckstrin homology domain interacting protein	2.657	0.003	XM_002690042.1		PTPLB	protein tyrosine phosphatase-like (proline instead of catalytic arginine), member b	2.294	0.009	NM_001130757.1								PFDN1	prefoldin subunit 1	3.559	0.012	NM_001078062.1		SMARCD2	SWI/SNF related, matrix associated, actin dependent regulator of chromatin, subfamily d, member 2	-3.549	0.017	NM_001205462.1
ZDHHC17	zinc finger, DHHC-type containing 17	2.365	0.02	XM_003585758.1								DOCK11	dedicator of cytokinesis 11	2.286	0.01	XM_002699465.1-1		THADA	thyroid adenoma associated	2.656	0.003	XM_002691249.2		LRRC8C	leucine rich repeat containing 8 family, member C	2.293	0.009	NM_001099039.1								ARRB1	arrestin, beta 1	3.557	0.012	NM_174243.2		LOC530077	GTPase IMAP family member 5-like	-3.563	0.016	XM_002687042.1
SMC5	structural maintenance of chromosomes 5	2.358	0.02	NM_001206069.1								C4H7orf30	mitochondrial assembly of ribosomal large subunit 1	2.284	0.01	NM_001075398.1		CUL3	cullin 3	2.655	0.003	NM_001192806.1		TLK1	tousled-like kinase 1	2.288	0.05	XM_002685281.2								INPP5D	inositol polyphosphate-5-phosphatase, 145kDa	3.555	0.012	NM_001101882.1		LOC530077	GTPase IMAP family member 5-like	-3.563	0.016	XM_002687043.1
SATB1	SATB homeobox 1	2.35	0.021	XM_002689640.2								PHTF1	putative homeodomain transcription factor 1	2.281	0.01	NM_001076077.1		SOS1	son of sevenless homolog 1 (Drosophila)	2.653	0.003	XM_002691241.2		ZZZ3	zinc finger, ZZ-type containing 3	2.284	0.009	NM_001102215.1								SNRK	SNF related kinase	3.55	0.012	XM_002696930.1		PUF60	poly-U binding splicing factor 60KDa	-3.581	0.016	NM_001046133.1
C6H4orf34	small integral membrane protein 14	2.348	0.021	NM_001102040.1								LOC100848900	uncharacterized LOC100848900	2.269	0.01	XR_139742.1		HIBCH	3-hydroxyisobutyryl-CoA hydrolase	2.652	0.003	NM_001046413.1		CAMK1D	calcium/calmodulin-dependent protein kinase ID	2.283	0.009	XM_002692061.2								LOC100336880	lysine (K)-specific demethylase 2A-like	3.549	0.013	XM_002699395.1		SPN	sialophorin	-3.593	0.015	NM_001103102.1
AAK1	AP2 associated kinase 1	2.344	0.021	NM_001046543.1								WDFY2	WD repeat and FYVE domain containing 2	2.265	0.011	NM_001075842.1		MKLN1	muskelin 1, intracellular mediator containing kelch motifs	2.652	0	NM_001097999.1-1		RNF169	ring finger protein 169	2.28	0.01	XM_002693463.1								UBE3C	ubiquitin protein ligase E3C	3.549	0.013	NM_001192188.1		RPS16	ribosomal protein S16	-3.599	0.015	NM_001033624.1
C8H9orf3	chromosome 8 open reading frame, human C9orf3	2.344	0.021	XM_002691441.2								KDM4C	lysine (K)-specific demethylase 4C	2.263	0.011	XM_002689595.2		CEP85L	centrosomal protein 85kDa-like	2.644	0.004	XM_002690081.2		ZNF407	zinc finger protein 407	2.278	0.01	XM_002697658.1								SLC39A11	solute carrier family 39 (metal ion transporter), member 11	3.547	0.013	NM_001076390.1		LFNG	LFNG O-fucosylpeptide 3-beta-N-acetylglucosaminyltransferase	-3.636	0.014	NM_001046222.1
LOC100848984	uncharacterized LOC100848984	2.344	0.021	NM_001206980.1								SYK	spleen tyrosine kinase	2.263	0.011	NM_001037465.1		LACE1	lactation elevated 1	2.637	0.004	NM_001192915.1		RORA	RAR-related orphan receptor A	2.277	0.01	NM_001192861.1								MAN2A1	mannosidase, alpha, class 2A, member 1	3.545	0.013	NM_001205886.1		SRSF2	serine/arginine-rich splicing factor 2	-3.655	0.013	NM_001034318.1
DRAM2	DNA-damage regulated autophagy modulator 2	2.339	0.022	XR_139266.1								LRRC4	leucine rich repeat containing 4	2.259	0.011	NM_001014938.1		MTMR3	myotubularin related protein 3	2.637	0.004	NM_001081605.1		MED13L	mediator complex subunit 13-like	2.274	0.01	NM_001192468.1								ASXL1	additional sex combs like 1 (Drosophila)	3.537	0.013	XM_002692288.1		GNAI2	guanine nucleotide binding protein (G protein), alpha inhibiting activity polypeptide 2	-3.664	0.013	NM_001101040.1
NCK1	NCK adaptor protein 1	2.338	0.022	NM_001076996.1								FOXN3	forkhead box N3	2.258	0.011	NM_001206687.1		RAPGEF6	Rap guanine nucleotide exchange factor (GEF) 6	2.637	0.01	XM_002688966.2		LOC616821	probable E3 ubiquitin-protein ligase MID2-like	2.273	0.01	XM_002699884.1								RUNX2	runt-related transcription factor 2	3.532	0.013	XM_002697262.1		EPHX2	epoxide hydrolase 2, cytoplasmic	-3.671	0.013	NM_001075534.1
C23H6orf106	chromosome 23 open reading frame, human C6orf106	2.337	0.022	NM_001076072.1								SRSF4	serine/arginine-rich splicing factor 4	2.257	0.011	NM_001101231.1		RAPGEF6	Rap guanine nucleotide exchange factor (GEF) 6	2.636	0.004	XM_003586276.1		ORC4	origin recognition complex, subunit 4	2.272	0.01	NM_001046301.1								IRF2	interferon regulatory factor 2	3.531	0.013	NM_001205793.1		TUBA1B	tubulin, alpha 1b	-3.673	0.013	NM_001114856.1
CDK19	cyclin-dependent kinase 19	2.335	0.022	NM_001076471.1								DCUN1D1	DCN1, defective in cullin neddylation 1, domain containing 1 (S. cerevisiae)	2.256	0.011	NM_001102233.1		LOC100296333	uncharacterized LOC100296333	2.634	0.004	XM_002691026.1		LOC781036	DnaJ (Hsp40) homolog, subfamily C, member 1	2.27	0.01	XM_003586766.1								EPS8L2	EPS8-like 2	3.525	0.013	XM_002699410.1		EEF2	eukaryotic translation elongation factor 2	-3.675	0.013	NM_001075121.1
COG5	component of oligomeric golgi complex 5	2.335	0.022	NM_001205707.1								UBE2H	ubiquitin-conjugating enzyme E2H	2.25	0.011	NM_001037614.1		SP140L	SP140 nuclear body protein-like	2.633	0.004	NM_001130765.1		TBC1D1	TBC1 (tre-2/USP6, BUB2, cdc16) domain family, member 1	2.27	0.01	NM_001166524.1								SACM1L	SAC1 suppressor of actin mutations 1-like (yeast)	3.524	0.013	NM_001102131.1		LOC785954	ribosomal protein S10 pseudogene	-3.692	0.012	XR_083660.1
UBE2H	ubiquitin-conjugating enzyme E2H	2.332	0.022	XM_003585967.1								ABL2	v-abl Abelson murine leukemia viral oncogene homolog 2	2.249	0.011	NM_001143855.1		SIDT1	SID1 transmembrane family, member 1	2.632	0.004	NM_001205633.1		RASAL2	RAS protein activator like 2	2.269	0.011	XM_002694157.2								PIK3R5	phosphoinositide-3-kinase, regulatory subunit 5	3.516	0.014	XM_002707761.2		RPS24	ribosomal protein S24	-3.698	0.012	NM_001025339.1
RASAL2	RAS protein activator like 2	2.332	0.023	NM_001037614.1								UBE2CBP	ubiquitin-conjugating enzyme E2C binding protein	2.248	0.011	NM_001075711.1		UBXN7	UBX domain protein 7	2.63	0.004	NM_001206764.1		PPP1R9A	protein phosphatase 1, regulatory subunit 9A	2.267	0.01	NM_001076153.2								CNNM3	cyclin M3	3.508	0.014	XM_002691165.2		RPL19	ribosomal protein L19	-3.701	0.01	XM_002695953.1
UBAC2	UBA domain containing 2	2.331	0.022	XM_002694157.2								NAF1	nuclear assembly factor 1 homolog (S. cerevisiae)	2.247	0.011	XM_003586172.1		DTNB	dystrobrevin, beta	2.627	0.004	NM_001192800.1		SBF2	SET binding factor 2	2.259	0.01	XM_003586952.1								SMURF1	SMAD specific E3 ubiquitin protein ligase 1	3.504	0.014	XM_002698145.2		SERBP1	SERPINE1 mRNA binding protein 1	-3.702	0.012	NM_001046449.1
ITK	IL2-inducible T-cell kinase	2.329	0.022	NM_001103344.1								GABPB1	GA binding protein transcription factor, beta subunit 1	2.246	0.012	NM_001075804.1		LOC100847553	uncharacterized LOC100847553	2.625	0.004	XM_003586631.1		ARID5B	AT rich interactive domain 5B (MRF1-like)	2.257	0.01	XM_002698842.2								C13H20orf196	chromosome 13 open reading frame, human C20orf196	3.501	0.014	NM_001046552.1		LOC100295976	uncharacterized LOC100295976	-3.705	0.012	XM_002687287.2
HMBOX1	homeobox containing 1	2.327	0.022	NM_001105388.1								OLA1	Obg-like ATPase 1	2.246	0.012	NM_001046045.1		PTBP2	polypyrimidine tract binding protein 2	2.622	0.004	NM_001110081.1		PTPRA	protein tyrosine phosphatase, receptor type, A	2.256	0.011	NM_001206499.1								PPP6R2	protein phosphatase 6, regulatory subunit 2	3.489	0.015	XM_002687984.2		TUBB4B	tubulin, beta 2C	-3.716	0.012	NM_001034663.1
LOC100337090	ankyrin repeat domain 26-like	2.321	0.023	NM_001192171.1								MEF2C	myocyte enhancer factor 2C	2.245	0.012	NM_001046113.1		KCTD9	potassium channel tetramerisation domain containing 9	2.621	0.004	NM_001102269.1		BCL2	B-cell CLL/lymphoma 2	2.254	0.011	NM_001166486.1								UBASH3B	ubiquitin associated and SH3 domain containing B	3.489	0.015	NM_001206128.1		LOC784473	ribosomal protein S12 pseudogene	-3.719	0.012	XR_139324.1
SMAP1	small ArfGAP 1	2.321	0.023	XR_139446.1								SPATA5	spermatogenesis associated 5	2.241	0.012	XM_002694399.2		FAF1	Fas (TNFRSF6) associated factor 1	2.62	0.004	NM_001046318.1		SNX13	sorting nexin 13	2.254	0.011	XM_003585951.1								NUDCD3	NudC domain containing 3	3.488	0.015	NM_001075997.1		RPS25	ribosomal protein S25	-3.721	0.012	NM_001025315.1
NEDD4L	neural precursor cell expressed, developmentally down-regulated 4-like, E3 ubiquitin protein ligase	2.318	0.023	XM_002690008.2								LOC784445	60S ribosomal protein L17-like	-2.224	0.013	XM_002691258.2		RAPGEF6	Rap guanine nucleotide exchange factor (GEF) 6	2.618	0.01	XM_003586277.1		SLC9A9	solute carrier family 9, subfamily A (NHE9, cation proton antiporter 9), member 9	2.251	0.011	NM_001076068.1								KAT2B	K(lysine) acetyltransferase 2B	3.482	0.015	XM_002684716.2		RPL27A	ribosomal protein L27a	-3.732	0.012	NM_001024471.1
UST	uronyl-2-sulfotransferase	2.316	0.027	XM_002697776.2								LGMN	legumain	-2.227	0.013	NM_174101.2		RASA1	RAS p21 protein activator (GTPase activating protein) 1	2.618	0.004	NM_174449.2		RASAL2	RAS protein activator like 2	2.248	0.01	XM_003587091.1								ZGPAT	zinc finger, CCCH-type with G patch domain	3.479	0.015	NM_001024514.2		RPL36	ribosomal protein L36	-3.732	0.012	NM_001078139.1
CSNK1G3	casein kinase 1, gamma 3	2.315	0.023	NM_001206826.1								BZW1	basic leucine zipper and W2 domains 1	-2.233	0.012	NM_001206613.1		ARHGAP15	Rho GTPase activating protein 15	2.617	0.004	NM_001105003.1		LACE1	lactation elevated 1	2.245	0.011	NM_001192915.1								CERS4	ceramide synthase 4	3.472	0.016	NM_001015520.1		ATF4	activating transcription factor 4 (tax-responsive enhancer element B67)	-3.737	0.012	NM_001034342.1
JHDM1D	jumonji C domain containing histone demethylase 1 homolog D (S. cerevisiae)	2.315	0.023	NM_001105329.2								ILK	integrin-linked kinase	-2.239	0.012	NM_001034693.1		MICU1	mitochondrial calcium uptake 1	2.616	0.004	NM_001075338.1		NFYC	nuclear transcription factor Y, gamma	2.243	0.011	NM_001034598.1								CHD6	chromodomain helicase DNA binding protein 6	3.466	0.016	NM_001243300.1		RPL4	ribosomal protein L4	-3.761	0.011	NM_001014894.1
RASAL2	RAS protein activator like 2	2.314	0.022	XM_002687068.2								CD9	CD9 molecule	-2.246	0.012	NM_173900.2		C1H3orf26	cms1 ribosomal small subunit homolog (yeast)	2.611	0.004	NM_001038215.1		RBM41	RNA binding motif protein 41	2.243	0.011	XM_002699883.2								MAML2	mastermind-like 2 (Drosophila)	3.458	0.016	NM_001098050.1		HNRNPAB	heterogeneous nuclear ribonucleoprotein A/B	-3.764	0.011	NM_001040522.1
PTK2	PTK2 protein tyrosine kinase 2	2.314	0.023	XM_003587091.1								RPL35	ribosomal protein L35	-2.255	0.011	NM_001034495.1		NFKB1	nuclear factor of kappa light polypeptide gene enhancer in B-cells 1	2.611	0.004	NM_001076409.1		NSF	N-ethylmaleimide-sensitive factor	2.241	0.011	XM_002696057.2								GALNT10	UDP-N-acetyl-alpha-D-galactosamine:polypeptide N-acetylgalactosaminyltransferase 10 (GalNAc-T10)	3.456	0.016	XM_002689328.1		RPL37A	ribosomal protein L37a	-3.775	0.011	NM_001035008.1
COA5	cytochrome c oxidase assembly factor 5	2.313	0.023	NM_001075250.2								GMFG	glia maturation factor, gamma	-2.262	0.011	NM_001024537.1		CERS6	ceramide synthase 6	2.61	0.004	NM_001193132.1		RAB4A	RAB4A, member RAS oncogene family	2.241	0.011	NM_001038685.1								TBC1D1	TBC1 (tre-2/USP6, BUB2, cdc16) domain family, member 1	3.453	0.016	NM_001166524.1		MIDN	midnolin	-3.777	0.011	XM_002689146.2
ZC3HAV1	zinc finger CCCH-type, antiviral 1	2.313	0.023	NM_001195024.1								ORMDL3	ORM1-like 3 (S. cerevisiae)	-2.262	0.011	NM_001076367.1		MLLT3	myeloid/lymphoid or mixed-lineage leukemia (trithorax homolog, Drosophila); translocated to, 3	2.608	0.004	NM_001192549.1		CALM1	calmodulin 1 (phosphorylase kinase, delta)	-2.224	0.012	NM_001242572.1								ST6GAL1	ST6 beta-galactosamide alpha-2,6-sialyltranferase 1	3.451	0.017	NM_177517.1		CD79A	CD79a molecule, immunoglobulin-associated alpha	-3.781	0.011	NM_174266.3
ZC3HAV1	zinc finger CCCH-type, antiviral 1	2.313	0.023	XM_002686998.2								H2AFZ	H2A histone family, member Z	-2.267	0.01	NM_174809.2		SNX13	sorting nexin 13	2.602	0.004	XM_003585951.1		PPIB	peptidylprolyl isomerase B (cyclophilin B)	-2.224	0.012	NM_174152.2								ACTN4	actinin, alpha 4	3.444	0.017	NM_001098052.1		RPL13A	ribosomal protein L13a	-3.796	0.011	NM_001076998.1
LOC100849046	T-lymphocyte surface antigen Ly-9-like	2.312	0.023	XM_003586006.1								RPL7	ribosomal protein L7	-2.267	0.011	NM_001014928.1		RNF125	ring finger protein 125	2.6	0.004	NM_001205859.1		PRR13	proline rich 13	-2.224	0.012	NM_001038047.1								WDFY4	WDFY family member 4	3.438	0.017	NM_001205945.1		RPL19	ribosomal protein L19	-3.828	0.012	NM_001040516.1
MGMT	O-6-methylguanine-DNA methyltransferase	2.311	0.024	XM_003585825.1								SLC7A11	solute carrier family 7 (anionic amino acid transporter light chain, xc- system), member 11	-2.267	0.011	XM_002694373.1		EBF1	early B-cell factor 1	2.599	0.004	NM_001192916.1		PTP4A2	protein tyrosine phosphatase type IVA, member 2	-2.224	0.012	NM_001104998.1								TTC7A	tetratricopeptide repeat domain 7A	3.432	0.017	NM_001205500.1		RPS10	ribosomal protein S10	-3.842	0.01	NM_001034716.1
USP24	ubiquitin specific peptidase 24	2.31	0.024	XM_002698584.1								B2M	beta-2-microglobulin-like	-2.271	0.003	NM_173893.3		ARMC10	armadillo repeat containing 10	2.594	0.004	NM_001191332.1		SEPX1	selenoprotein X, 1	-2.226	0.012	NM_001034810.2								LUC7L	LUC7-like (S. cerevisiae)	3.425	0.018	NM_001080301.1		RPL37	ribosomal protein L37	-3.847	0.01	NM_001078132.1
LOC786760	butyrophilin, subfamily 3, member A3	2.303	0.024	XM_002686388.2								RPL23A	ribosomal protein L23a	-2.273	0.01	NM_001045958.1		PDS5A	PDS5, regulator of cohesion maintenance, homolog A (S. cerevisiae)	2.594	0.004	XM_002688229.1		ARPC5L	actin related protein 2/3 complex, subunit 5-like	-2.23	0.012	NM_001034737.1								LOC100335353	uncharacterized LOC100335353	3.421	0.018	XM_003587738.1		CLIC1	chloride intracellular channel 1	-3.852	0.009	NM_001015608.1
YAF2	YY1 associated factor 2	2.302	0.024	XR_084051.1								BTG1	B-cell translocation gene 1, anti-proliferative	-2.274	0.01	NM_173999.2		MGMT	O-6-methylguanine-DNA methyltransferase	2.591	0.004	XM_002698584.1		BNIP3L	BCL2/adenovirus E1B 19kDa interacting protein 3-like	-2.23	0.012	NM_001034614.1								KLC1	kinesin light chain 1	3.41	0.018	NM_001098915.1		HMGB2	high mobility group box 2	-3.879	0.009	NM_001037616.1
EXOC6B	exocyst complex component 6B	2.294	0.025	NM_001076079.1								EEF1G	eukaryotic translation elongation factor 1 gamma	-2.275	0.01	NM_001040487.1		PPP3CA	protein phosphatase 3, catalytic subunit, alpha isozyme	2.591	0.004	NM_174787.2		LOC100847459	uncharacterized LOC100847459	-2.231	0.012	XM_003586189.1								WDR25	WD repeat domain 25	3.402	0.019	NM_001206428.1		LOC787404	ribosomal protein S20-like	-3.884	0.009	XM_002697700.2
CDK13	cyclin-dependent kinase 13	2.292	0.016	NM_001076416.1								TIFA	TRAF-interacting protein with forkhead-associated domain	-2.275	0.01	NM_001081621.1		NFAT5	nuclear factor of activated T-cells 5, tonicity-responsive	2.589	0.005	XM_002694839.2		HN1L	hematological and neurological expressed 1-like	-2.233	0.012	NM_001081546.1								STX8	syntaxin 8	3.399	0.019	NM_001078037.1		RPS23	ribosomal protein S23	-3.888	0.009	NM_001034690.1
ACN9	ACN9 homolog (S. cerevisiae)	2.287	0.026	NM_001205431.1								IK	IK cytokine, down-regulator of HLA II	-2.28	0.01	NM_001103349.1		ITPR1	inositol 1,4,5-trisphosphate receptor, type 1	2.588	0.005	NM_174841.2		LOC783838	eukaryotic translation elongation factor 1 alpha 1 pseudogene	-2.233	0.012	XR_083736.2								ANKS1A	ankyrin repeat and sterile alpha motif domain containing 1A	3.398	0.019	XM_002697185.2		CCND3	cyclin D3	-3.916	0.008	NM_001034709.1
USP40	ubiquitin specific peptidase 40	2.287	0.026	NM_001080352.1								S1PR1	sphingosine-1-phosphate receptor 1	-2.282	0.01	NM_001013585.3		LOC523504	uncharacterized LOC523504	2.587	0.005	XM_002689430.1		GRTP1	growth hormone regulated TBC protein 1	-2.235	0.011	NM_001103336.1								ARHGAP26	Rho GTPase activating protein 26	3.398	0.019	NM_001205522.1-2		MYEOV2	myeloma overexpressed 2	-3.917	0.008	NM_001195051.1
RAPGEF6	Rap guanine nucleotide exchange factor (GEF) 6	2.286	0.019	XM_002686556.1								APEX1	APEX nuclease (multifunctional DNA repair enzyme) 1	-2.285	0.01	NM_176609.3		BIRC6	baculoviral IAP repeat containing 6	2.586	0.005	NM_001206582.1		RPS3	ribosomal protein S3	-2.235	0.011	NM_001034047.1								PAX5	paired box 5	3.39	0.019	XM_002689717.2		RPL13	ribosomal protein L13	-3.927	0.008	NM_001015543.1
PML	promyelocytic leukemia	2.286	0.026	XM_002688965.2								C4H7orf41	maturin, neural progenitor differentiation regulator homolog (Xenopus)	-2.286	0.01	NM_001101246.1		C26H10orf76	chromosome 26 open reading frame, human C10orf76	2.584	0.005	XM_002698448.1		PIM3	pim-3 oncogene	-2.236	0.011	XM_002688010.2								SEMA4D	sema domain, immunoglobulin domain (Ig), transmembrane domain (TM) and short cytoplasmic domain, (semaphorin) 4D	3.389	0.02	NM_001098160.1		RPS12	ribosomal protein S12	-3.939	0.008	NM_001014387.1
STAT1	signal transducer and activator of transcription 1, 91kDa	2.285	0.026	NM_001206503.1								ANP32E	acidic (leucine-rich) nuclear phosphoprotein 32 family, member E	-2.29	0.01	NM_001075306.1		NFAT5	nuclear factor of activated T-cells 5, tonicity-responsive	2.584	0.005	XM_003587226.1		SF3A1	splicing factor 3a, subunit 1, 120kDa	-2.237	0.011	NM_001081510.1								KDM2B	lysine (K)-specific demethylase 2B	3.386	0.02	XM_002694489.2		MTA2	metastasis associated 1 family, member 2	-3.962	0.007	NM_001075712.1
RAPGEF6	Rap guanine nucleotide exchange factor (GEF) 6	2.284	0.011	NM_001077900.1								PAH	phenylalanine hydroxylase	-2.294	0.009	NM_001046058.1		NFAT5	nuclear factor of activated T-cells 5, tonicity-responsive	2.584	0.005	XM_003587227.1		JUND	jun D proto-oncogene	-2.241	0.011	NM_001103253.1								SERINC5	serine incorporator 5	3.379	0.02	XM_002690460.1		LOC618297	high mobility group protein B2-like	-4	0.007	XM_002686665.1
MLLT10	protein AF-10-like	2.28	0.026	XM_003586275.1								ATP5H	ATP synthase, H+ transporting, mitochondrial Fo complex, subunit d	-2.298	0.009	NM_174724.3		LOC100849046	T-lymphocyte surface antigen Ly-9-like	2.582	0.005	XM_003585825.1		RAP1A	RAP1A, member of RAS oncogene family	-2.241	0.011	NM_174448.3								PCBD2	pterin-4 alpha-carbinolamine dehydratase/dimerization cofactor of hepatocyte nuclear factor 1 alpha (TCF1) 2	3.37	0.021	XM_002689200.2		RPS28	ribosomal protein S28	-4.03	0.006	NM_001025316.1
PHF20	PHD finger protein 20	2.28	0.026	XM_003586765.1								TPM4	tropomyosin 4	-2.303	0.009	NM_001101162.1		RPTOR	regulatory associated protein of MTOR, complex 1	2.581	0.005	NM_001192130.1		LOC100141266	tubulin alpha-1C chain-like	-2.243	0.011	XM_003586052.1								NR2C2	nuclear receptor subfamily 2, group C, member 2	3.362	0.021	NM_001192061.1		RPS27A	ribosomal protein S27a	-4.069	0.005	NM_174778.1
MAGI3	membrane associated guanylate kinase, WW and PDZ domain containing 3	2.278	0.027	NM_001168426.1								LOC788541	ribosomal protein L7 pseudogene	-2.305	0.009	XR_083686.2		MEF2A	myocyte enhancer factor 2A	2.58	0.005	NM_001083638.1		LOC100848406	uncharacterized LOC100848406	-2.245	0.009	XR_139406.1								CNNM2	cyclin M2	3.358	0.021	NM_001191172.1		RPS8	ribosomal protein S8	-4.084	0.005	NM_001025317.1
UST	uronyl-2-sulfotransferase	2.275	0.023	NM_001192746.1								C15H11orf46	chromosome 15 open reading frame, human C11orf46	-2.308	0.009	NM_001031761.2		CHCHD3	coiled-coil-helix-coiled-coil-helix domain containing 3	2.579	0.005	NM_001035475.1		LOC782938	eukaryotic translation initiation factor 4 gamma 2-like	-2.252	0.011	XR_083698.2								CDYL	chromodomain protein, Y-like	3.354	0.021	NM_001102223.1		RPLP2	ribosomal protein, large, P2	-4.098	0.005	NM_174788.3
RABEP1	rabaptin, RAB GTPase binding effector protein 1	2.275	0.027	NM_001206827.1								SELK	selenoprotein K	-2.308	0.009	NM_001037489.2		PFDN1	prefoldin subunit 1	2.579	0.005	NM_001078062.1		LOC789148	ras-related protein Rap-1b-like	-2.254	0.011	XM_003586274.1								LOC100847274	leucine-rich repeat-containing protein 41-like	3.345	0.022	XM_003585920.1		UQCRH	ubiquinol-cytochrome c reductase hinge protein	-4.159	0.004	NM_001034745.1
CCDC38	coiled-coil domain containing 38	2.265	0.028	NM_001193161.1								CD79A	CD79a molecule, immunoglobulin-associated alpha	-2.313	0.009	NM_174266.3		PLCL2	phospholipase C-like 2	2.579	0.005	NM_001192255.1		NPC2	Niemann-Pick disease, type C2	-2.254	0.011	NM_173918.2								SBF1	SET binding factor 1	3.329	0.023	XM_002687985.1		RPS20	ribosomal protein S20	-4.161	0.004	NM_001034438.1
CERS6	ceramide synthase 6	2.265	0.028	XM_003586075.1								SPAG7	sperm associated antigen 7	-2.313	0.009	NM_001038543.1		LOC100137763	uncharacterized LOC100137763	2.578	0.005	XM_002686687.1		TLN1	talin 1	-2.254	0.011	NM_001205428.1								PARP10	poly (ADP-ribose) polymerase family, member 10	3.328	0.023	XM_002692548.1		LOC781381	nascent polypeptide-associated complex alpha subunit pseudogene	-4.172	0.004	XR_083742.2
LOC781886	zinc finger, C3H1-type containing	2.262	0.028	NM_001193132.1								CALM1	calmodulin 1 (phosphorylase kinase, delta)	-2.314	0.009	NM_001242572.1		LOC100847597	uncharacterized LOC100847597	2.578	0.005	XM_003585871.1		CORO2A	coronin, actin binding protein, 2A	-2.256	0.011	NM_001038220.1								ARL15	ADP-ribosylation factor-like 15	3.327	0.023	NM_001014943.1		TMSB4	thymosin beta 4, X-linked	-4.233	0.003	NM_001113231.1
YTHDC2	YTH domain containing 2	2.262	0.028	XM_003586031.1								RFXAP	regulatory factor X-associated protein	-2.322	0.008	XM_002691750.2		WC1	WC1 isolate DV9	2.578	0.005	XM_003586140.1-1		FTL	ferritin, light polypeptide	-2.257	0.01	NM_174792.3								TNRC6A	trinucleotide repeat containing 6A	3.325	0.023	XM_002698027.2		RPL34	ribosomal protein L34	-4.238	0.003	NM_001206221.1
RAB4A	RAB4A, member RAS oncogene family	2.261	0.028	NM_001192811.1								MYH9	myosin, heavy chain 9, non-muscle	-2.324	0.008	NM_001192762.1		RPS6KA3	ribosomal protein S6 kinase, 90kDa, polypeptide 3	2.575	0.005	NM_001098937.1		LOC404103	spleen trypsin inhibitor	-2.259	0.01	NM_205786.1								TAF6	TAF6 RNA polymerase II, TATA box binding protein (TBP)-associated factor, 80kDa	3.322	0.023	NM_001015525.1		RPL11	ribosomal protein L11	-4.247	0.003	NM_001075581.1
TBCA	tubulin folding cofactor A	2.261	0.028	NM_001038685.1								RPL8	ribosomal protein L8	-2.335	0.008	NM_001034625.1		UVRAG	UV radiation resistance associated gene	2.574	0.005	NM_001193026.1		FBXL14	F-box and leucine-rich repeat protein 14	-2.261	0.01	NM_001075947.1								UBE2O	ubiquitin-conjugating enzyme E2O	3.319	0.023	XM_002696167.1		LOC790088	40S ribosomal protein S28-like	-4.273	0.003	XR_084093.2
RNF130	ring finger protein 130	2.259	0.028	NM_175803.3								RPS15	ribosomal protein S15	-2.336	0.008	NM_001024541.1		AAK1	AP2 associated kinase 1	2.572	0.005	XM_002691441.2		COX17	COX17 cytochrome c oxidase assembly homolog (S. cerevisiae)	-2.263	0.01	XM_002684734.2								UBE4B	ubiquitination factor E4B	3.313	0.024	NM_001102504.1		RPLP1	ribosomal protein, large, P1	-4.293	0.003	NM_001025340.1
MEF2A	myocyte enhancer factor 2A	2.258	0.028	NM_001099708.1								TRRAP	transformation/transcription domain-associated protein	-2.339	0.008	NM_001192137.1		HDGFRP3	hepatoma-derived growth factor, related protein 3	2.571	0.005	NM_001191368.1		MAT2B	methionine adenosyltransferase II, beta	-2.263	0.01	NM_001046526.1								AVEN	apoptosis, caspase activation inhibitor	3.312	0.024	XM_002690781.2		RPS7	ribosomal protein S7	-4.33	0.003	NM_001098874.1
CTNNB1	catenin (cadherin-associated protein), beta 1, 88kDa	2.257	0.029	NM_001083638.1								LOC613595	L-lactate dehydrogenase B chain-like	-2.343	0.008	XM_003585668.1		REPS1	RALBP1 associated Eps domain containing 1	2.571	0.005	NM_001193011.1		ARF6	ADP-ribosylation factor 6	-2.264	0.01	XM_003586562.1								DOCK11	dedicator of cytokinesis 11	3.312	0.024	XM_002699465.1-1		CDC2L1	cell division cycle 2-like 1 (PITSLRE proteins)	-4.412	0.003	NM_001007811.2
MAML2	mastermind-like 2 (Drosophila)	2.257	0.029	NM_001076141.1								ARRDC3	arrestin domain containing 3	-2.344	0.008	NM_001076257.1		RUNX1T1	runt-related transcription factor 1; translocated to, 1 (cyclin D-related)	2.57	0.005	NM_001099385.1		C7H19orf42	small integral membrane protein 7	-2.266	0.01	NM_001205376.2								HLA-DOA	major histocompatibility complex, class II, DO alpha	3.307	0.024	NM_001205920.1		TMSB4X	thymosin beta 4, X-linked	-4.417	0.003	NM_001002885.1
ETS1	v-ets erythroblastosis virus E26 oncogene homolog 1 (avian)	2.256	0.029	NM_001098050.1								DDX3Y	DEAD (Asp-Glu-Ala-Asp) box polypeptide 3, Y-linked	-2.344	0.008	NM_001172595.1		EPC1	enhancer of polycomb homolog 1 (Drosophila)	2.564	0.005	NM_001192810.1		NDUFB3	NADH dehydrogenase (ubiquinone) 1 beta subcomplex, 3, 12kDa	-2.266	0.01	NM_176667.2								SETD3	SET domain containing 3	3.305	0.024	XM_002696833.1		CCDC72	coiled-coil domain containing 72	-4.425	0.003	NM_001163803.1
USP25	ubiquitin specific peptidase 25	2.256	0.029	NM_001099106.1								HDAC1	histone deacetylase 1	-2.345	0.008	NM_001037444.1		FTO	fat mass and obesity associated	2.559	0.005	NM_001098142.1		AK2	adenylate kinase 2	-2.269	0.01	NM_173889.1								DTNBP1	dystrobrevin binding protein 1	3.289	0.025	NM_001045947.1		STMN1	stathmin 1	-4.469	0.002	NM_001034790.1
ARIH2	ariadne homolog 2 (Drosophila)	2.253	0.029	XM_002684646.2								RPS13	ribosomal protein S13	-2.349	0.007	NM_001025342.2		TAF1	TAF1 RNA polymerase II, TATA box binding protein (TBP)-associated factor, 250kDa	2.554	0.005	XM_002700041.1		ABHD14B	abhydrolase domain containing 14B	-2.271	0.01	NM_001105441.1								LOC537017	cytidine monophosphate-N-acetylneuraminic acid hydroxylase-like	3.288	0.025	XM_002697563.2		RPL32	ribosomal protein L32	-4.758	0.001	NM_001034783.1
PPP3CA	protein phosphatase 3, catalytic subunit, alpha isozyme	2.252	0.029	NM_001206242.1								LOC784521	ribosomal protein S6-like	-2.351	0.007	XR_139420.1		TIPRL	TIP41, TOR signaling pathway regulator-like (S. cerevisiae)	2.552	0.005	NM_001079615.1		EZR	ezrin	-2.271	0.01	NM_174217.2								THADA	thyroid adenoma associated	3.276	0.026	XM_002691249.2		CD52	CD52 molecule	-4.892	0.001	NM_001198996.1
HS3ST1	heparan sulfate (glucosamine) 3-O-sulfotransferase 1	2.244	0.03	NM_174787.2								PTMA	prothymosin, alpha (gene sequence 28)	-2.352	0.007	XM_003585780.1		ZNF407	zinc finger protein 407	2.552	0.005	XM_002697658.1		ZHX2	zinc fingers and homeoboxes 2	-2.272	0.01	NM_001206406.1								ASMTL	acetylserotonin O-methyltransferase-like	3.263	0.027	XM_003587884.1-2
KIAA0922	KIAA0922 ortholog	2.243	0.03	NM_001076122.1								RPS18	ribosomal protein S18	-2.354	0.007	NM_001033614.1		TBCA	tubulin folding cofactor A	2.551	0.005	NM_175803.3		DGAT2	diacylglycerol O-acyltransferase 2	-2.273	0.01	NM_205793.2								PPP1R16B	protein phosphatase 1, regulatory subunit 16B	3.262	0.027	NM_174824.2
HERC4	HECT and RLD domain containing E3 ubiquitin protein ligase 4	2.24	0.03	NM_001076803.1								IL27RA	interleukin 27 receptor, alpha	-2.355	0.007	NM_001098028.1		TRIM33	tripartite motif containing 33	2.549	0.005	NM_001206018.1		FHL1	four and a half LIM domains 1	-2.274	0.014	NM_001034341.1								EWSR1	Ewing sarcoma breakpoint region 1	3.258	0.027	NM_001109800.1
IL1B	interleukin 1, beta	-2.24	0.03	NM_001076894.2								TMED9	transmembrane emp24 protein transport domain containing 9	-2.356	0.007	NM_001034812.1		HS2ST1	heparan sulfate 2-O-sulfotransferase 1	2.548	0.005	XM_002686305.1		PIM1	pim-1 oncogene	-2.274	0.01	NM_174144.2								PARN	poly(A)-specific ribonuclease	3.258	0.027	NM_001101118.1
RPL35A	ribosomal protein L35a	-2.241	0.03	NM_174093.1								GNB2L1	guanine nucleotide binding protein (G protein), beta polypeptide 2-like 1	-2.364	0.007	NM_175802.2		AMBRA1	autophagy/beclin-1 regulator 1	2.547	0.005	XM_003587010.1		PYGL	phosphorylase, glycogen, liver	-2.274	0.01	NM_001075203.1								KIAA1310	KIAA1310 ortholog	3.25	0.028	NM_001099172.1
CFP	complement factor properdin	-2.242	0.03	NM_001025321.2								S100A8	S100 calcium binding protein A8	-2.37	0.007	NM_001113725.1		ASH1L	ash1 (absent, small, or homeotic)-like (Drosophila)	2.541	0.006	NM_001192743.1		MOV10L1	Mov10l1, Moloney leukemia virus 10-like 1, homolog (mouse)	-2.277	0.01	XM_002687999.2								DDX39B	DEAD (Asp-Glu-Ala-Asp) box polypeptide 39B	3.24	0.029	NM_001033629.1
LOC512248	DnaJ (Hsp40) homolog, subfamily C, member 8 pseudogene	-2.243	0.03	NM_001076178.1								LOC614922	heterogeneous nuclear ribonucleoprotein A1 pseudogene	-2.378	0.007	XM_003586990.1		NBEA	neurobeachin	2.541	0	XM_003586700.1-2		LOC784354	ribosomal protein L12 pseudogene	-2.279	0.01	XR_083996.1								LOC100848477	F-box protein 42	3.239	0.029	XM_003585804.1
CFDP1	craniofacial development protein 1	-2.255	0.029	XR_083977.1								LOC613519	ribosomal protein L3 pseudogene	-2.379	0.007	XR_083776.2		RAP2A	RAP2A, member of RAS oncogene family	2.54	0.006	NM_001192942.1		SORL1	sortilin-related receptor, L(DLR class) A repeats containing	-2.28	0.01	NM_001192757.1								WASF2	WAS protein family, member 2	3.239	0.029	NM_001081511.1
CD97	CD97 molecule	-2.256	0.029	NM_174268.1								LOC100300305	elongation factor 1-alpha, somatic form-like	-2.38	0.007	XM_002697497.2		NAA25	N(alpha)-acetyltransferase 25, NatB auxiliary subunit	2.538	0.006	NM_001206127.1		S100A11	S100 calcium binding protein A11	-2.287	0.009	NM_001098856.1								WDR59	WD repeat domain 59	3.236	0.029	NM_001101130.1
LOC783376	ribosomal protein L7 pseudogene	-2.256	0.029	NM_176661.1								ANP32A	acidic (leucine-rich) nuclear phosphoprotein 32 family, member A	-2.382	0.007	NM_001195019.1		ACSS3	acyl-CoA synthetase short-chain family member 3	2.531	0.006	NM_001102137.1		VAMP3	vesicle-associated membrane protein 3 (cellubrevin)	-2.287	0.009	NM_001045915.1								LOC100298723	myotubularin-related protein 8-like	3.23	0.029	XM_003588185.1
RPL10A	ribosomal protein L10a	-2.256	0.029	XR_083601.1								LOC782609	nucleosome assembly protein 1-like 1-like	-2.384	0.006	XM_002707812.2		FAM172A	family with sequence similarity 172, member A	2.522	0.006	XM_002689392.2		LOC100848406	uncharacterized LOC100848406	-2.29	0.011	XR_139405.1								CMTM7	CKLF-like MARVEL transmembrane domain containing 7	3.209	0.031	NM_001075960.1
CALR	calreticulin	-2.257	0.029	NM_001015647.1								LOC781381	nascent polypeptide-associated complex alpha subunit pseudogene	-2.391	0.006	XR_083742.2		BRWD3	bromodomain and WD repeat domain containing 3	2.52	0.006	XM_002699937.2		FHL1	four and a half LIM domains 1	-2.291	0.009	NM_001113258.1								CSK	c-src tyrosine kinase	3.206	0.031	NM_001075397.1
LOC781200	uncharacterized LOC781200	-2.262	0.028	NM_174000.2								RPS14	ribosomal protein S14	-2.392	0.006	NM_001077830.1		GLMN	glomulin, FKBP associated protein	2.52	0.006	NM_001192020.1		MOB3A	MOB kinase activator 3A	-2.292	0.009	NM_001034229.1								TET3	tet methylcytosine dioxygenase 3	3.206	0.031	XM_002691203.2-2
LOC100848193	uncharacterized LOC100848193	-2.264	0.028	XR_084170.2								LOC782038	protein phosphatase 1A-like	-2.395	0.006	XM_002686315.1		MASP2	mannan-binding lectin serine peptidase 2	2.516	0.006	NM_001192072.2		DPF2	D4, zinc and double PHD fingers family 2	-2.294	0.009	NM_001100356.1								CLCN3	chloride channel 3	3.201	0.032	NM_001193003.1
LOC100848571	uncharacterized LOC100848571	-2.27	0.027	XM_003587667.1								KCP	collagen alpha-1(I) chain-like	-2.399	0.006	XM_002686948.2		LOC100336482	vacuolar protein sorting 13 homolog A (S. cerevisiae)	2.515	0.006	XM_002689670.2		AHCY	adenosylhomocysteinase	-2.298	0.009	NM_001034315.1								RNF121	ring finger protein 121	3.199	0.032	NM_001102245.1
RPL15	ribosomal protein L15	-2.27	0.027	XR_139606.1								DUSP1	dual specificity phosphatase 1	-2.401	0.006	NM_001046452.1		MDFIC	MyoD family inhibitor domain containing	2.515	0.006	NM_001101102.1		HNRNPA1L2	heterogeneous nuclear ribonucleoprotein A1-like 2	-2.299	0.009	XM_002685402.2								KLHDC4	kelch domain containing 4	3.198	0.032	XM_002694759.1
RPL17	ribosomal protein L17	-2.273	0.027	NM_001077866.1								SUB1	SUB1 homolog (S. cerevisiae)	-2.401	0.006	NM_001105407.1		USP24	ubiquitin specific peptidase 24	2.513	0.006	XM_002686388.2		GOLGA7	golgin A7	-2.3	0.009	NM_001035484.1								C25H7orf42	transmembrane protein 248	3.194	0.032	NM_001046081.1
OST4	oligosaccharyltransferase 4 homolog (S. cerevisiae)	-2.281	0.026	NM_001034459.1								UBL5	ubiquitin-like 5	-2.402	0.006	NM_001037710.1		MLLT10	protein AF-10-like	2.508	0.006	XM_003586765.1		CDC42BPB	CDC42 binding protein kinase beta (DMPK-like)	-2.302	0.009	XM_003587584.1								DDX31	DEAD (Asp-Glu-Ala-Asp) box polypeptide 31	3.193	0.032	NM_001101886.1
RPL26	ribosomal protein L26	-2.285	0.026	XM_002691457.1								C29H11orf75	single-pass membrane protein with coiled-coil domains 4	-2.407	0.006	XM_002698992.2		CTNNB1	catenin (cadherin-associated protein), beta 1, 88kDa	2.507	0.006	NM_001076141.1		THTPA	thiamine triphosphatase	-2.304	0.009	NM_174470.3								UBR4	ubiquitin protein ligase E3 component n-recognin 4	3.193	0.032	NM_001205792.1
LOC614922	heterogeneous nuclear ribonucleoprotein A1 pseudogene	-2.286	0.026	NM_001015512.2								GNAI2	guanine nucleotide binding protein (G protein), alpha inhibiting activity polypeptide 2	-2.409	0.006	NM_001101040.1		TLK2	tousled-like kinase 2	2.507	0.006	NM_001192827.1		HRSP12	heat-responsive protein 12	-2.305	0.009	NM_001034208.1								ITPR3	inositol 1,4,5-trisphosphate receptor, type 3	3.186	0.033	NM_174370.2
TSC22D3	TSC22 domain family, member 3	-2.294	0.025	XM_003586990.1								PARK7	parkinson protein 7	-2.413	0.006	NM_001015572.1		TTC21B	tetratricopeptide repeat domain 21B	2.507	0.006	NM_001102108.1		WIPF1	WAS/WASL interacting protein family, member 1	-2.306	0.009	NM_001076923.1								CAMK2D	calcium/calmodulin-dependent protein kinase II delta	3.183	0.033	NM_001046333.1
SQRDL	sulfide quinone reductase-like (yeast)	-2.298	0.025	NM_001103342.1								LOC100138864	eukaryotic translation initiation factor 4A2 pseudogene	-2.419	0.006	XR_083821.2		LEF1	lymphoid enhancer-binding factor 1	2.505	0.006	NM_001192856.1		LOC100848561	chromosome 20 open reading frame, human C5orf51	-2.307	0.009	XR_139623.1								LRRC4	leucine rich repeat containing 4	3.172	0.034	NM_001014938.1
C23H6orf25	chromosome 23 open reading frame, human C6orf25	-2.306	0.024	NM_001040511.2								RPL15	ribosomal protein L15	-2.421	0.005	NM_001077866.1		PHTF1	putative homeodomain transcription factor 1	2.503	0.006	NM_001076077.1		SQRDL	sulfide quinone reductase-like (yeast)	-2.307	0.009	NM_001040511.2								ZNF609	zinc finger protein 609	3.171	0.034	NM_001193023.1
ARRDC3	arrestin domain containing 3	-2.311	0.024	NM_001078081.1								LOC785386	ribosomal protein L10-like	-2.432	0.005	XM_002687966.1		CLOCK	clock homolog (mouse)	2.501	0.007	XM_002688257.2		C23H6orf130	chromosome 23 open reading frame, human C6orf130	-2.311	0.008	NM_001077113.1								LOC100848365	uncharacterized LOC100848365	3.165	0.035	XR_139413.1
PIM1	pim-1 oncogene	-2.312	0.023	NM_001076257.1								MYL6	myosin, light chain 6, alkali, smooth muscle and non-muscle	-2.434	0.005	NM_175780.1		UIMC1	ubiquitin interaction motif containing 1	2.501	0.007	NM_001038061.2		TPD52L2	tumor protein D52-like 2	-2.311	0.008	NM_001034615.1								NFATC1	nuclear factor of activated T-cells, cytoplasmic, calcineurin-dependent 1	3.165	0.035	NM_001166615.1
LOC781576	mCG1723-like	-2.321	0.019	NM_174144.2								TMCC3	transmembrane and coiled-coil domain family 3	-2.435	0.005	NM_001038063.1		IMPG2	interphotoreceptor matrix proteoglycan 2	2.497	0.007	XM_002684719.2		RPS27	ribosomal protein S27	-2.312	0.004	NR_024613.1								MED15	mediator complex subunit 15	3.146	0.036	NM_001099175.1
OAZ1	ornithine decarboxylase antizyme 1	-2.321	0.023	XM_003585885.1								LOC786726	heterogeneous nuclear ribonucleoprotein K pseudogene	-2.436	0.005	XR_083865.1		ARFGEF1	ADP-ribosylation factor guanine nucleotide-exchange factor 1 (brefeldin A-inhibited)	2.496	0.007	NM_173997.2		CREG1	cellular repressor of E1A-stimulated genes 1	-2.314	0.008	NM_001075942.1								RNF4	ring finger protein 4	3.144	0.036	NM_001046589.1
LOC785386	ribosomal protein L10-like	-2.323	0.023	NM_001127243.1								OAZ1	ornithine decarboxylase antizyme 1	-2.439	0.005	NM_001127243.1		LOC615842	Alport syndrome, mental retardation, midface hypoplasia and elliptocytosis chromosomal region gene 1	2.495	0.007	XM_003588138.1		CCNDBP1	cyclin D-type binding-protein 1	-2.315	0.008	NM_001046604.1								ARHGAP25	Rho GTPase activating protein 25	3.141	0.037	NM_001046392.1
DNAI1	dynein, axonemal, intermediate chain 1	-2.326	0.023	XM_002687966.1								LOC100848513	60S ribosomal protein L10-like	-2.44	0.005	XM_003586150.1		METTL15	methyltransferase like 15	2.49	0.007	NM_001079782.1		SPAG7	sperm associated antigen 7	-2.315	0.008	NM_001038543.1								SMG1	smg-1 homolog, phosphatidylinositol 3-kinase-related kinase (C. elegans)	3.14	0.037	NM_001205915.1
UBL5	ubiquitin-like 5	-2.326	0.023	NM_001038142.1								ADAT1	adenosine deaminase, tRNA-specific 1	-2.452	0.005	NM_001081620.1		PRIM2	primase, DNA, polypeptide 2 (58kDa)	2.488	0.007	NM_001079594.1		CCDC96	coiled-coil domain containing 96	-2.316	0.008	NM_001103314.1								ANKRD27	ankyrin repeat domain 27 (VPS9 domain)	3.138	0.037	NM_001102532.1
RPL36	ribosomal protein L36	-2.328	0.022	NM_001037710.1								RPL9	ribosomal protein L9	-2.454	0.005	NM_001024469.2		SS18	synovial sarcoma translocation, chromosome 18	2.488	0.007	NM_001098122.1		RPL22	ribosomal protein L22	-2.317	0.008	XM_002694113.2								NCOR2	nuclear receptor corepressor 2	3.138	0.037	XM_003587159.1
DOCK7	dedicator of cytokinesis 7	-2.331	0.022	NM_001078139.1								HMGB2	high mobility group box 2	-2.46	0.005	NM_001037616.1		FNIP1	folliculin interacting protein 1	2.487	0.007	XM_002688971.2		S100A8	S100 calcium binding protein A8	-2.317	0.008	NM_001113725.1								RPS6KA5	ribosomal protein S6 kinase, 90kDa, polypeptide 5	3.134	0.037	NM_001192023.1
CCND3	cyclin D3	-2.332	0.022	NM_001192906.2								HNRNPAB	heterogeneous nuclear ribonucleoprotein A/B	-2.46	0.005	NM_001040522.1		RCSD1	RCSD domain containing 1	2.485	0.007	NM_001034418.1		OSTM1	osteopetrosis associated transmembrane protein 1	-2.319	0.008	NM_001075776.1								EXT2	exostosin 2	3.133	0.037	NM_177496.3
LOC100848780	uncharacterized LOC100848780	-2.337	0.022	NM_001034709.1								PTP4A2	protein tyrosine phosphatase type IVA, member 2	-2.468	0.004	NM_001104998.1		SCAP	SREBF chaperone	2.485	0.007	NM_001101889.1		PPP1CA	protein phosphatase 1, catalytic subunit, alpha isozyme	-2.319	0.008	NM_001035316.1								NUP214	nucleoporin 214kDa	3.132	0.037	NM_001205443.1
RPL37	ribosomal protein L37	-2.338	0.022	XM_003586094.1								GATM	glycine amidinotransferase (L-arginine:glycine amidinotransferase)	-2.472	0.004	NM_001045878.1		FANCC	Fanconi anemia, complementation group C	2.475	0	NM_174316.2-2		FKBP11	FK506 binding protein 11, 19 kDa	-2.32	0.008	NM_001045932.1								SKAP1	src kinase associated phosphoprotein 1	3.132	0.037	XM_002695944.2
COX6C	cytochrome c oxidase subunit VIc	-2.339	0.022	NM_001078132.1								PUF60	poly-U binding splicing factor 60KDa	-2.472	0.004	NM_001046133.1		HUWE1	HECT, UBA and WWE domain containing 1	2.475	0.007	NM_001110004.1		LOC100297647	translationally-controlled tumor protein-like	-2.32	0.008	XM_002690912.2								NCOR1	nuclear receptor corepressor 1	3.127	0.038	NM_001193059.1
GABARAP	GABA(A) receptor-associated protein	-2.34	0.022	XM_002690379.1								RPL10	ribosomal protein L10	-2.475	0.004	NM_174760.2		ST3GAL5	ST3 beta-galactoside alpha-2,3-sialyltransferase 5	2.474	0.007	NM_205807.2		UBR7	ubiquitin protein ligase E3 component n-recognin 7 (putative)	-2.322	0.008	NM_001082601.1								CASC3	cancer susceptibility candidate 3	3.126	0.038	NM_001098069.1
ZFP36L2	zinc finger protein 36, C3H type-like 2	-2.341	0.022	NM_001034048.1								EIF1	eukaryotic translation initiation factor 1	-2.476	0.004	NM_001014884.1		RUNX1	runt-related transcription factor 1	2.47	0.007	XM_002685147.2		SELPLG	selectin P ligand	-2.324	0.008	NM_001037628.1								IKZF3	IKAROS family zinc finger 3 (Aiolos)	3.125	0.038	NM_001081613.1
SPI1	spleen focus forming virus (SFFV) proviral integration oncogene spi1	-2.342	0.022	NM_001191191.1								RPL36AL	ribosomal protein L36a-like	-2.477	0.004	NM_001079508.1		CYLD	cylindromatosis (turban tumor syndrome)	2.468	0.007	NM_001046417.1		CCDC18	coiled-coil domain-containing protein 18-like	-2.327	0.008	XM_002686232.1								RHEB	Ras homolog enriched in brain	3.124	0.038	NM_001031764.1
TOMM22	translocase of outer mitochondrial membrane 22 homolog (yeast)	-2.343	0.021	NM_001192133.1								FAM101B	family with sequence similarity 101, member B	-2.485	0.004	XM_002695711.2		REV3L	REV3-like, catalytic subunit of DNA polymerase zeta (yeast)	2.467	0.007	NM_001206172.1		AHSA1	AHA1, activator of heat shock 90kDa protein ATPase homolog 1 (yeast)	-2.331	0.008	NM_001034666.1								LOC784517	solute carrier family 7 (cationic amino acid transporter, y+ system), member 3-like	3.117	0.005	XM_003587331.1-1
SYF2	SYF2 homolog, RNA splicing factor (S. cerevisiae)	-2.344	0.021	NM_001100335.1								SAP18	Sin3A-associated protein, 18kDa	-2.488	0.004	NM_001035467.2		LOC534587	lin-9 homolog (C. elegans)	2.463	0.008	XM_003587058.1		BZW1	basic leucine zipper and W2 domains 1	-2.331	0.008	NM_001206613.1								PACSIN2	protein kinase C and casein kinase substrate in neurons 2	3.117	0.039	NM_001046468.1
GRK6	G protein-coupled receptor kinase 6	-2.345	0.021	XM_002685769.2								PLA2G15	phospholipase A2, group XV	-2.493	0.004	NM_174560.2		KLHDC10	kelch domain containing 10	2.46	0.008	NM_001075227.1		C10H15orf24	chromosome 10 open reading frame, human C15orf24	-2.331	0.008	NM_001099143.1								ARFGEF2	ADP-ribosylation factor guanine nucleotide-exchange factor 2 (brefeldin A-inhibited)	3.113	0.039	NM_001205652.1
GRK6	G protein-coupled receptor kinase 6	-2.345	0.021	NM_001191530.1								LOC789018	ribosomal protein L23a pseudogene	-2.497	0.004	XR_139713.1		NXN	nucleoredoxin	2.46	0.008	NM_001102136.1		RAD21	RAD21 homolog (S. pombe)	-2.335	0.008	NM_001034717.1								LOC100848258	DNA (cytosine-5)-methyltransferase 3A-like	3.113	0.039	XM_003586660.1
LOC790088	40S ribosomal protein S28-like	-2.349	0.021	NM_001205390.1								PNRC1	proline-rich nuclear receptor coactivator 1	-2.497	0.004	NM_001034308.1		LOC783300	uncharacterized LOC783300	2.455	0.008	XM_002699990.1		HIRIP3	HIRA interacting protein 3	-2.337	0.008	NM_001192296.1								PIK3AP1	phosphoinositide-3-kinase adaptor protein 1	3.113	0.039	XM_002698411.2
RPL19	ribosomal protein L19	-2.35	0.031	XR_084093.2								PEBP1	phosphatidylethanolamine binding protein 1	-2.499	0.004	NM_001033623.1		IKZF3	IKAROS family zinc finger 3 (Aiolos)	2.451	0.008	NM_001081613.1		NET1	neuroepithelial cell transforming 1	-2.337	0.008	NM_001034296.1								PPP2R5C	protein phosphatase 2, regulatory subunit B', gamma	3.113	0.039	NM_001083376.1
MYADM	myeloid-associated differentiation marker	-2.356	0.021	XM_002695953.1								SSR2	signal sequence receptor, beta (translocon-associated protein beta)	-2.503	0.004	NM_001015533.1		KIAA1370	KIAA1370 ortholog	2.45	0.008	XM_002690921.2		ARRDC3	arrestin domain containing 3	-2.338	0.007	NM_001076257.1								LOC100336707	nuclear receptor binding SET domain protein 1-like	3.11	0.039	XM_002689017.2
MTA2	metastasis associated 1 family, member 2	-2.361	0.02	NM_001075252.1								EIF5A	eukaryotic translation initiation factor 5A	-2.507	0.004	NM_001003658.2		MED27	mediator complex subunit 27	2.45	0.008	NM_001040546.1		DAXX	death-domain associated protein	-2.338	0.007	NM_001075155.1								SNAP47	synaptosomal-associated protein, 47kDa	3.11	0.039	NM_001102320.1
PUF60	poly-U binding splicing factor 60KDa	-2.362	0.02	NM_001075712.1								LOC785954	ribosomal protein S10 pseudogene	-2.51	0.004	XR_083660.1		ATF1	activating transcription factor 1	2.449	0.008	NM_001075289.1		SSRP1	structure specific recognition protein 1	-2.338	0.007	NM_001101041.1								MAP4K1	mitogen-activated protein kinase kinase kinase kinase 1	3.101	0.04	NM_001075825.2
LOC789867	eukaryotic translation elongation factor 1 alpha 1 pseudogene	-2.364	0.02	NM_001046133.1								PAPPA	pregnancy-associated plasma protein A, pappalysin 1	-2.514	0.004	XM_002689953.2		SERGEF	secretion regulating guanine nucleotide exchange factor	2.448	0.008	NM_001076021.1		LOC614207	eukaryotic translation initiation factor 5B-like	-2.339	0.007	XR_084141.1								SCFD2	sec1 family domain containing 2	3.098	0.041	NM_001078005.1
PTPN18	protein tyrosine phosphatase, non-receptor type 18 (brain-derived)	-2.367	0.02	XR_083807.1								PF4	platelet factor 4	-2.516	0.004	NM_001101062.1		MGA	MAX gene associated	2.442	0.008	NM_001191402.1		MFNG	MFNG O-fucosylpeptide 3-beta-N-acetylglucosaminyltransferase	-2.34	0.007	NM_001101051.1								PPP4R1	protein phosphatase 4, regulatory subunit 1	3.097	0.041	XM_002697800.1
HELB	helicase (DNA) B	-2.371	0.02	NM_001078069.1								EEF2	eukaryotic translation elongation factor 2	-2.523	0.003	NM_001075121.1		TNIK	TRAF2 and NCK interacting kinase	2.442	0.008	XM_002684922.2		TALDO1	transaldolase 1	-2.34	0.007	NM_001035283.2								OSBPL10	oxysterol binding protein-like 10	3.096	0.041	XM_002696885.2
RPLP0	ribosomal protein, large, P0	-2.372	0.02	NM_001206182.1								DAD1	defender against cell death 1	-2.525	0.003	NM_001034761.1		GABPB1	GA binding protein transcription factor, beta subunit 1	2.439	0.008	NM_001075804.1		TSPYL4	TSPY-like 4	-2.34	0.007	NM_001101064.1								LPP	LIM domain containing preferred translocation partner in lipoma	3.091	0.041	NM_001192591.1
SLC40A1	solute carrier family 40 (iron-regulated transporter), member 1	-2.372	0.02	NM_001012682.1								SYF2	SYF2 homolog, RNA splicing factor (S. cerevisiae)	-2.53	0.003	XM_002685769.2		KIAA0391	KIAA0391 ortholog	2.437	0.008	NM_001102148.1		MESDC2	mesoderm development candidate 2	-2.341	0.007	NM_001034469.1								SKI	v-ski sarcoma viral oncogene homolog (avian)	3.089	0.041	XM_002694180.1
LOC787081	TraB domain containing 2B	-2.373	0.02	NM_001077970.1								WDR1	WD repeat domain 1	-2.53	0.003	NM_001046346.1		FOXO1	forkhead box O1	2.434	0.008	XM_002691748.2		TOMM6	translocase of outer mitochondrial membrane 6 homolog (yeast)	-2.341	0.007	NM_001113718.1								SLC23A2	solute carrier family 23 (nucleobase transporters), member 2	3.087	0.042	NM_001205430.1
DGAT2	diacylglycerol O-acyltransferase 2	-2.376	0.019	XM_002686409.1								RPS11	ribosomal protein S11	-2.533	0.003	NM_001024568.1		ADD1	adducin 1 (alpha)	2.433	0.008	NM_001205999.1		ACTR3	ARP3 actin-related protein 3 homolog (yeast)	-2.343	0.007	NM_174226.2								PRKAG2	protein kinase, AMP-activated, gamma 2 non-catalytic subunit	3.084	0.042	XM_002686979.2
RPL6	ribosomal protein L6	-2.377	0.019	NM_205793.2								EEF1A1	eukaryotic translation elongation factor 1 alpha 1	-2.534	0.003	NM_174535.1		MAP2K5	mitogen-activated protein kinase kinase 5	2.433	0.008	NM_001206770.1		SLX1A	SLX1 structure-specific endonuclease subunit homolog A (S. cerevisiae)	-2.344	0.007	NM_001037456.1								MLH1	mutL homolog 1, colon cancer, nonpolyposis type 2 (E. coli)	3.078	0.043	NM_001075994.2
CD68	CD68 molecule	-2.378	0.019	NM_001031756.1								LOC781070	elongation factor 1-alpha 1-like	-2.544	0.003	XR_083751.1		PPHLN1	periphilin 1	2.433	0.008	NM_001075972.1		C5AR1	complement component 5a receptor 1	-2.345	0.007	NM_001007810.3								SPPL3	signal peptide peptidase like 3	3.078	0.043	XM_002694525.2
EIF1	eukaryotic translation initiation factor 1	-2.381	0.019	NM_001045902.1								LOC100848406	uncharacterized LOC100848406	-2.548	0.002	XR_139406.1		ELP4	elongator acetyltransferase complex subunit 4	2.432	0.009	NM_001038684.1		LOC788405	ribosomal protein L12 pseudogene	-2.345	0.007	XR_139580.1								KLF12	Kruppel-like factor 12	3.074	0.043	NM_001191270.2
SLC23A1	solute carrier family 23 (ascorbic acid transporter), member 1	-2.383	0.019	NM_001014884.1								LOC782479	60S ribosomal protein L26-like	-2.551	0.003	XR_083794.1		CNOT6L	CCR4-NOT transcription complex, subunit 6-like	2.431	0.009	NM_001191523.1		NID2	nidogen 2 (osteonidogen)	-2.346	0.007	NM_001102065.1								PIP5K1A	phosphatidylinositol-4-phosphate 5-kinase, type I, alpha	3.071	0.043	NM_001103109.2
LOC781576	mCG1723-like	-2.384	0.023	XM_002689263.2								RPL36A	ribosomal protein L36a-like	-2.555	0.003	NM_001034316.1		KIAA1310	KIAA1310 ortholog	2.431	0.009	NM_001099172.1		SERPINE2	serpin peptidase inhibitor, clade E (nexin, plasminogen activator inhibitor type 1), member 2	-2.35	0.007	NM_174669.2								TXNDC11	thioredoxin domain containing 11	3.067	0.044	NM_001083420.1
CSF1R	colony stimulating factor 1 receptor	-2.391	0.019	XM_003585884.1								LLPH	LLP homolog, long-term synaptic facilitation (Aplysia)	-2.562	0.003	NM_001038522.1		TMEM161B	transmembrane protein 161B	2.426	0.009	NM_001205673.1		BCOR	BCL6 corepressor	-2.352	0.007	NM_001191544.1								ZNF333	zinc finger protein 333	3.065	0.044	XM_002688732.1
PRR13	proline rich 13	-2.397	0.018	NM_001075403.2								B2M	beta-2-microglobulin-like	-2.564	0.01	XM_002691119.1		ATP8B4	probable phospholipid-transporting ATPase IM-like	2.424	0.009	XM_002690973.1		GLG1	golgi glycoprotein 1	-2.352	0.007	NM_001244140.1								PHGDH	phosphoglycerate dehydrogenase	3.049	0.046	NM_001035017.1
C5AR1	complement component 5a receptor 1	-2.4	0.018	NM_001038047.1								SPN	sialophorin	-2.565	0.003	NM_001103102.1		C10H14orf101	transmembrane protein 260	2.422	0.009	NM_001099139.1		IFNAR2	interferon (alpha, beta and omega) receptor 2	-2.352	0.007	NM_174553.2								CTNNB1	catenin (cadherin-associated protein), beta 1, 88kDa	3.048	0.046	NM_001076141.1
LOC782470	tropomyosin 1 (alpha) pseudogene	-2.405	0.018	NM_001007810.3								CITED2	Cbp/p300-interacting transactivator, with Glu/Asp-rich carboxy-terminal domain, 2	-2.566	0.003	NM_001075819.1		MINOS1	mitochondrial inner membrane organizing system 1	2.422	0.009	XM_003585800.1		METTL5	methyltransferase like 5	-2.352	0.007	NM_001099135.1								JAKMIP1	janus kinase and microtubule interacting protein 1	3.045	0.046	NM_001102251.1
MYD88	myeloid differentiation primary response gene (88)	-2.406	0.018	XR_083734.2								NXPH1	neurexophilin 1	-2.567	0.003	NM_001034762.1		RBM26	RNA binding motif protein 26	2.419	0.009	XM_002691902.2		KAT5	K(lysine) acetyltransferase 5	-2.354	0.007	NM_001192066.1								LOC100848452	uncharacterized LOC100848452	3.044	0.046	XM_003587288.1
ITGB6	integrin, beta 6	-2.407	0.018	NM_001014382.2								ITGB6	integrin, beta 6	-2.57	0.003	NM_174698.2		RBMS1	RNA binding motif, single stranded interacting protein 1	2.416	0.009	NM_001035361.1		ZDHHC7	zinc finger, DHHC-type containing 7	-2.355	0.007	XM_002694749.2								ATXN7	ataxin 7	3.043	0.046	XM_002696986.2
EPHX2	epoxide hydrolase 2, cytoplasmic	-2.415	0.017	NM_174698.2								PPM1A	protein phosphatase, Mg2+/Mn2+ dependent, 1A	-2.571	0.003	NM_174429.2		PRKCE	protein kinase C, epsilon	2.415	0.009	NM_001111120.1		TRIM35	tripartite motif containing 35	-2.356	0.007	XM_002689793.2								DYM	dymeclin	3.043	0.046	NM_001192999.1
ZDHHC7	zinc finger, DHHC-type containing 7	-2.416	0.017	NM_001075534.1								NDFIP1	Nedd4 family interacting protein 1	-2.578	0.003	XM_002689268.2		ACN9	ACN9 homolog (S. cerevisiae)	2.412	0.009	NM_001080352.1		TSR2	TSR2, 20S rRNA accumulation, homolog (S. cerevisiae)	-2.356	0.007	NM_001035097.1								PKN1	protein kinase N1	3.041	0.047	NM_001080246.1
PFKFB3	6-phosphofructo-2-kinase/fructose-2,6-biphosphatase 3	-2.417	0.017	XM_002694749.2								LOC788405	ribosomal protein L12 pseudogene	-2.579	0.003	XR_139580.1		WASL	Wiskott-Aldrich syndrome-like	2.412	0.009	NM_174219.2		EIF1	eukaryotic translation initiation factor 1	-2.357	0.007	NM_001014884.1								MED13L	mediator complex subunit 13-like	3.04	0.047	NM_001192468.1
NFE2	nuclear factor (erythroid-derived 2), 45kDa	-2.425	0.017	NM_001077837.1								LOC100296121	zinc finger protein 132-like	-2.582	0.003	XM_002695444.2		AGPS	alkylglycerone phosphate synthase	2.409	0.009	NM_001206719.1-2		MAP2K7	mitogen-activated protein kinase kinase 7	-2.357	0.007	XM_002688836.2								ABL1	c-abl oncogene 1, non-receptor tyrosine kinase	3.038	0.047	NM_001206860.1
LLPH	LLP homolog, long-term synaptic facilitation (Aplysia)	-2.427	0.017	NM_001014923.1								NME2	non-metastatic cells 2, protein (NM23B) expressed in	-2.588	0.003	NM_001076376.1		NOX1	NADPH oxidase 1	2.408	0.009	NM_001191340.1		TOMM22	translocase of outer mitochondrial membrane 22 homolog (yeast)	-2.357	0.007	NM_001100335.1								KCNQ5	potassium voltage-gated channel, KQT-like subfamily, member 5	3.034	0.047	XM_002690016.2
EIF3D	eukaryotic translation initiation factor 3, subunit D	-2.43	0.017	NM_001038522.1								LOC100848406	uncharacterized LOC100848406	-2.596	0.003	XR_139405.1		LOC100848900	uncharacterized LOC100848900	2.407	0.009	XR_139743.1		SSU72	SSU72 RNA polymerase II CTD phosphatase homolog (S. cerevisiae)	-2.359	0.007	NM_001076349.1								USP4	ubiquitin specific peptidase 4 (proto-oncogene)	3.031	0.048	NM_001100319.1
BRI3	brain protein I3	-2.431	0.016	NM_001034484.1								LOC784087	nuclear casein kinase and cyclin-dependent kinase substrate 1 pseudogene	-2.607	0.002	XR_083845.1		TDRD3	tudor domain containing 3	2.407	0.009	NM_001046426.1		HMGB1	high mobility group box 1	-2.36	0.007	NM_176612.1								XPC	xeroderma pigmentosum, complementation group C	3.031	0.048	NM_001205908.1
ZYX	zyxin	-2.437	0.016	NM_001040583.1								HRH4	histamine receptor H4	-2.608	0.002	XM_002697718.1		LOC100848900	uncharacterized LOC100848900	2.406	0.009	XR_139742.1		LOC511386	nucleophosmin-like	-2.361	0.007	XM_002686718.1								KIAA0319L	KIAA0319-like ortholog	3.028	0.048	XM_002686480.1
HNRNPUL1	heterogeneous nuclear ribonucleoprotein U-like 1	-2.442	0.016	NM_001078101.1								ATF4	activating transcription factor 4 (tax-responsive enhancer element B67)	-2.611	0.002	NM_001034342.1		LOC751804	WC1 isolate DV100	2.406	0.009	XR_084195.2		PLA2G15	phospholipase A2, group XV	-2.363	0.007	NM_174560.2								LMTK2	lemur tyrosine kinase 2	3.028	0.048	XM_003587856.1
SLC2A3	solute carrier family 2 (facilitated glucose transporter), member 3	-2.442	0.016	NM_001083466.1								CDH23	cadherin-related 23	-2.611	0.002	NM_001191206.1		EPC2	enhancer of polycomb homolog 2 (Drosophila)	2.405	0.009	NM_001192242.1		LOC781022	ferritin, heavy polypeptide 1 pseudogene	-2.364	0.007	XR_084136.1								FAM49B	family with sequence similarity 49, member B	3.023	0.049	NM_001046047.1
RPLP2	ribosomal protein, large, P2	-2.443	0.016	NM_174603.3								SAT1	spermidine/spermine N1-acetyltransferase 1	-2.614	0.002	NM_001034333.1		MBTD1	mbt domain containing 1	2.403	0.009	NM_001206222.1		LOC789587	ribosomal protein L17 pseudogene	-2.364	0.007	XR_139553.1								C24H18orf1	low density lipoprotein receptor class A domain containing 4	3.013	0.05	XM_002697753.2
LAPTM5	lysosomal protein transmembrane 5	-2.445	0.016	NM_174788.3								RPLP1	ribosomal protein, large, P1	-2.625	0.002	NM_001025340.1		CENPI	centromere protein I	2.401	0.009	NM_001102494.1		PUS10	pseudouridylate synthase 10	-2.368	0.007	NM_001206837.1								ERC1	ELKS/RAB6-interacting/CAST family member 1	3.011	0.05	NM_001205419.1
RAB5C	RAB5C, member RAS oncogene family	-2.448	0.016	NM_001046118.1								C8H9orf80	chromosome 8 open reading frame, human C9orf80	-2.629	0.002	NM_001078064.1		MNAT1	menage a trois homolog 1, cyclin H assembly factor (Xenopus laevis)	2.401	0.009	NM_001105409.1		ETS2	v-ets erythroblastosis virus E26 oncogene homolog 2 (avian)	-2.369	0.007	NM_001080214.1								SMYD3	SET and MYND domain containing 3	3.008	0.05	NM_001076406.1
RPL27A	ribosomal protein L27a	-2.455	0.015	NM_001034743.2								RPL35A	ribosomal protein L35a	-2.63	0.002	NM_001025321.2		ARAP2	ArfGAP with RhoGAP domain, ankyrin repeat and PH domain 2	2.4	0.01	XM_002688221.2		LOC613345	H3 histone, family 3A-like	-2.369	0.007	XM_002686707.2								EIF4G3	eukaryotic translation initiation factor 4 gamma, 3	3.002	0	XM_003585794.1
LOC783838	eukaryotic translation elongation factor 1 alpha 1 pseudogene	-2.461	0.015	NM_001024471.1								LOC785568	mortality factor 4 like 1 pseudogene	-2.632	0.002	XR_083597.2		C15H11orf30	chromosome 15 open reading frame, human C11orf30	2.399	0.01	NM_001206822.1		PCSK6	proprotein convertase subtilisin/kexin type 6	-2.371	0.007	XM_002696654.2								ATG7	autophagy related 7	2.646	0.001	NM_001083795.2
CALCOCO1	calcium binding and coiled-coil domain 1	-2.466	0.015	XR_083736.2								LOC100337215	peptidylprolyl isomerase A (cyclophilin A)-like	-2.634	0.002	XM_002690515.2		EHBP1	EH domain binding protein 1	2.397	0.01	XM_002691381.2		DDX24	DEAD (Asp-Glu-Ala-Asp) box polypeptide 24	-2.372	0.007	NM_001099045.1								UTP14A	UTP14, U3 small nucleolar ribonucleoprotein, homolog A-like	-2.697	0.028	NM_001100302.1
RPLP1	ribosomal protein, large, P1	-2.466	0.015	NM_001046435.1								LAPTM5	lysosomal protein transmembrane 5	-2.64	0.002	NM_001046118.1		UBE2D2	ubiquitin-conjugating enzyme E2D 2	2.397	0.01	NM_001046496.1		PUF60	poly-U binding splicing factor 60KDa	-2.372	0.007	NM_001046133.1								PPIA	peptidylprolyl isomerase A (cyclophilin A)	-2.982	0.031	XM_002690516.1
CALM	calmodulin-like	-2.473	0.014	NM_001025340.1								LOC100848913	uncharacterized LOC100848913	-2.64	0.002	XR_139376.1		SMG1	smg-1 homolog, phosphatidylinositol 3-kinase-related kinase (C. elegans)	2.394	0.01	NM_001205915.1		CSPG5	chondroitin sulfate proteoglycan 5 (neuroglycan C)	-2.373	0.007	NM_001075229.1								TMEM9B	TMEM9 domain family, member B	-3.007	0.05	NM_001034507.1
H3F3B	H3 histone, family 3B	-2.476	0.014	NM_001166508.1								UBD	ubiquitin D	-2.655	0.002	NM_001206473.1		FANCL	Fanconi anemia, complementation group L	2.393	0.01	NM_001076332.1		CRISP3	cysteine-rich secretory protein 3	-2.374	0.006	NM_001079635.1								EIF1B	eukaryotic translation initiation factor 1B	-3.01	0.05	NM_001037598.1
RAC2	ras-related C3 botulinum toxin substrate 2 (rho family, small GTP binding protein Rac2)	-2.476	0.014	NM_001242571.1								CNBP	CCHC-type zinc finger, nucleic acid binding protein	-2.657	0.002	NM_001034224.1		PTPRA	protein tyrosine phosphatase, receptor type, A	2.393	0.01	NM_001206499.1		RRAGA	Ras-related GTP binding A	-2.374	0.006	NM_001035499.1								EIF3CL	eukaryotic translation initiation factor 3, subunit C-like	-3.011	0.05	NM_001034618.1
LOC508628	ribosomal protein S6 pseudogene	-2.478	0.014	NM_175792.2								NRBP1	nuclear receptor binding protein 1	-2.658	0.002	NM_001076889.1		RNF111	ring finger protein 111	2.393	0.01	NM_001102239.1		C10H14orf166	chromosome 10 open reading frame, human C14orf166	-2.375	0.006	NM_001035280.1								SLC40A1	solute carrier family 40 (iron-regulated transporter), member 1	-3.013	0.05	NM_001077970.1
LOC784473	ribosomal protein S12 pseudogene	-2.492	0.013	NM_001015548.1								LOC504548	ubiquitin D-like	-2.662	0.002	XM_002697377.1		KIAA1432	KIAA1432 ortholog	2.392	0.009	XM_003586384.1		COG1	component of oligomeric golgi complex 1	-2.376	0.006	NM_001192427.1								HELB	helicase (DNA) B	-3.015	0.05	NM_001206182.1
HIST2H2BE	histone cluster 2, H2be	-2.495	0.013	XR_139324.1								ARPC5	actin related protein 2/3 complex, subunit 5, 16kDa	-2.67	0.002	NM_001035447.1		RLF	rearranged L-myc fusion	2.388	0.01	NM_001205939.1		ARHGEF2	Rho/Rac guanine nucleotide exchange factor (GEF) 2	-2.377	0.006	NM_001098881.2								RPS11	ribosomal protein S11	-3.021	0.049	NM_001024568.1
APEX1	APEX nuclease (multifunctional DNA repair enzyme) 1	-2.5	0.013	NM_001099384.1								UBAP1L	ubiquitin associated protein 1-like	-2.67	0.002	XM_002690466.1		ATP11B	ATPase, class VI, type 11B	2.387	0.01	XM_002684898.2		LOC784473	ribosomal protein S12 pseudogene	-2.378	0.006	XR_139324.1								GAPDH	glyceraldehyde-3-phosphate dehydrogenase	-3.022	0.049	NM_001034034.1
EDA	ectodysplasin A	-2.503	0.013	NM_176609.3								NPM1	nucleophosmin (nucleolar phosphoprotein B23, numatrin)	-2.672	0.002	NM_001035441.1		BCL2	B-cell CLL/lymphoma 2	2.387	0.01	NM_001166486.1		RNF167	ring finger protein 167	-2.379	0.006	NM_001076405.2								CITED2	Cbp/p300-interacting transactivator, with Glu/Asp-rich carboxy-terminal domain, 2	-3.026	0.048	NM_001075819.1
RPS6	ribosomal protein S6	-2.511	0.012	NM_001081743.2								LDHB	lactate dehydrogenase B	-2.682	0.002	NM_174100.1		SOCS5	suppressor of cytokine signaling 5	2.387	0.01	NM_001046182.1		TUBB	tubulin, beta	-2.38	0.006	XM_002698780.1								VCPIP1	valosin containing protein (p97)/p47 complex interacting protein 1	-3.027	0.048	XM_002692680.2
RPL23	ribosomal protein L23	-2.513	0.012	XM_003586371.1								RPL19	ribosomal protein L19	-2.687	0	NM_001040516.1		EHBP1	EH domain binding protein 1	2.386	0.01	XM_002691379.2		HSP90AA1	heat shock protein 90kDa alpha (cytosolic), class A member 1	-2.388	0.006	NM_001012670.2								CTSS	cathepsin S	-3.028	0.048	NM_001033615.1
RPL13A	ribosomal protein L13a	-2.515	0.012	NM_001035014.1								ZRSR2Y	zinc finger (CCCH type), RNA-binding motif and serine/arginine rich 2	-2.694	0.001	XM_003588207.1		LOC100337090	ankyrin repeat domain 26-like	2.386	0.01	XR_139446.1		LOC786726	heterogeneous nuclear ribonucleoprotein K pseudogene	-2.389	0.006	XR_083865.1								APEX1	APEX nuclease (multifunctional DNA repair enzyme) 1	-3.029	0.048	NM_176609.3
TKDP5	trophoblast Kunitz domain protein 5	-2.517	0.012	NM_001076998.1								HMGN2	high mobility group nucleosomal binding domain 2	-2.695	0.001	NM_001098945.1		KIF5B	kinesin family member 5B	2.385	0.01	NM_001192365.1		PPDPF	pancreatic progenitor cell differentiation and proliferation factor homolog (zebrafish)	-2.39	0.006	NM_001075294.1								SELL	selectin L	-3.029	0.048	NM_174182.1
HMGN2	high mobility group nucleosomal binding domain 2	-2.521	0.012	XM_003586852.1								CHCHD2	coiled-coil-helix-coiled-coil-helix domain containing 2	-2.699	0.001	NM_001034746.1		USP18	ubiquitin specific peptidase 18	2.384	0.01	NM_001017940.1		SLA2	Src-like-adaptor 2	-2.39	0.006	NM_001035294.1								DSTN	destrin (actin depolymerizing factor)	-3.032	0.048	NM_001015586.1
EMP3	epithelial membrane protein 3	-2.526	0.012	NM_001098945.1								MTA2	metastasis associated 1 family, member 2	-2.704	0.001	NM_001075712.1		NDUFA10	NADH dehydrogenase (ubiquinone) 1 alpha subcomplex, 10, 42kDa	2.383	0.01	NM_176655.2		GATAD2B	GATA zinc finger domain containing 2B	-2.391	0.006	NM_001192047.1								PUS10	pseudouridylate synthase 10	-3.038	0.047	NM_001206837.1
RPS24	ribosomal protein S24	-2.528	0.012	NM_001024562.1								GRK6	G protein-coupled receptor kinase 6	-2.707	0.001	NM_001191530.1		PPP3R1	protein phosphatase 3, regulatory subunit B, alpha	2.383	0.01	NM_174583.2		TMBIM6	transmembrane BAX inhibitor motif containing 6	-2.391	0.006	NM_001076414.1								DAZAP2	DAZ associated protein 2	-3.04	0.047	NM_001034701.1
LOC100847354	uncharacterized LOC100847354	-2.529	0.012	NM_001025339.1								LOC100335936	ribosomal protein L9 pseudogene	-2.707	0.001	XR_083897.1		SYNJ2BP	synaptojanin 2 binding protein	2.383	0.01	NM_001035355.1		RASSF1	Ras association (RalGDS/AF-6) domain family member 1	-2.392	0.006	NM_001075442.1								ARID4A	AT rich interactive domain 4A (RBP1-like)	-3.042	0.046	XM_002690958.2
DAGLB	diacylglycerol lipase, beta	-2.53	0.012	XM_003587372.1								PTPN18	protein tyrosine phosphatase, non-receptor type 18 (brain-derived)	-2.717	0.001	NM_001078069.1		PKN2	protein kinase N2	2.382	0.01	NM_001193242.1		SHC1	SHC (Src homology 2 domain containing) transforming protein 1	-2.392	0.038	NM_001164061.1								LOC504548	ubiquitin D-like	-3.044	0.046	XM_002697377.1
EMR3	egf-like module containing, mucin-like, hormone receptor-like 3	-2.531	0.012	NM_001083487.1								KARS	lysyl-tRNA synthetase	-2.718	0.001	NM_001034356.1		RAPGEF6	Rap guanine nucleotide exchange factor (GEF) 6	2.381	0.004	XM_002688965.2		MYL12A	myosin, light chain 12A, regulatory, non-sarcomeric	-2.393	0.006	NM_001015640.2								DHRS7	dehydrogenase/reductase (SDR family) member 7	-3.048	0.046	NM_001046162.1
LRRC16A	leucine rich repeat containing 16A	-2.533	0.011	XR_083707.2								TCEAL4	transcription elongation factor A (SII)-like 4	-2.724	0.001	XM_002699844.2		AKAP13	A kinase (PRKA) anchor protein 13	2.376	0.01	XM_002696531.2		LOC783641	ribosomal protein L12 pseudogene	-2.394	0.006	XM_003587379.1								CCNDBP1	cyclin D-type binding-protein 1	-3.053	0.045	NM_001046604.1
LOC404103	spleen trypsin inhibitor	-2.535	0.011	NM_001192903.1								LOC782776	eukaryotic translation elongation factor 1 alpha 1 pseudogene	-2.731	0.001	XR_083578.2		TRIT1	tRNA isopentenyltransferase 1	2.376	0.01	NM_001192840.1		RPL7A	ribosomal protein L7a	-2.394	0.006	NM_001040520.1								MGC127538	uncharacterized protein MGC127538	-3.053	0.045	XM_002690126.2
CALM3	calmodulin 3 (phosphorylase kinase, delta)	-2.541	0.011	NM_205786.1								OST4	oligosaccharyltransferase 4 homolog (S. cerevisiae)	-2.733	0.001	XM_002691457.1		NRF1	nuclear respiratory factor 1	2.375	0.01	NM_001098002.1		RPS2	ribosomal protein S2	-2.396	0.006	NM_001033613.1								LOC100848315	uncharacterized LOC100848315	-3.059	0.045	XM_003587081.1
LITAF	lipopolysaccharide-induced TNF factor	-2.542	0.011	NM_001046249.1								RPL14	ribosomal protein L14	-2.735	0.001	NM_001034674.1		TMEM164	transmembrane protein 164	2.372	0.01	NM_001031762.1		FAM32A	family with sequence similarity 32, member A	-2.397	0.006	NM_001105004.1								LOC614423	phosphoglycerate mutase 1 (brain) pseudogene	-3.067	0.044	XR_083813.1
STMN1	stathmin 1	-2.546	0.011	NM_001046252.1								LRRC16A	leucine rich repeat containing 16A	-2.737	0.001	NM_001192903.1		CDH10	cadherin 10, type 2 (T2-cadherin)	2.37	0.011	NM_001076266.2		RHOA	ras homolog gene family, member A	-2.399	0.006	NM_176645.3								PPIP5K2	diphosphoinositol pentakisphosphate kinase 2	-3.067	0.044	NM_001191152.1
LOC100848913	uncharacterized LOC100848913	-2.553	0.011	NM_001034790.1								LASP1	LIM and SH3 protein 1	-2.743	0.001	NM_001035394.1		AKAP9	A kinase (PRKA) anchor protein (yotiao) 9	2.369	0.011	XM_002686651.2		LOC783253	FCF1 small subunit-like	-2.401	0.006	XR_083796.1								RPL14	ribosomal protein L14	-3.072	0.043	NM_001034674.1
ETFB	electron-transfer-flavoprotein, beta polypeptide	-2.564	0.01	XR_139376.1								MGC126945	uncharacterized protein MGC126945	-2.744	0.001	NM_001076983.1		ADAM10	ADAM metallopeptidase domain 10	2.367	0.011	NM_174496.2		NDUFB8	NADH dehydrogenase (ubiquinone) 1 beta subcomplex, 8, 19kDa	-2.401	0.006	NM_174667.2								LOC783577	heat shock protein 90kDa alpha (cytosolic), class B member 1 pseudogene	-3.075	0.043	XR_084151.2
PRKAR2A	protein kinase, cAMP-dependent, regulatory, type II, alpha	-2.573	0.01	NM_001038582.1								RPS6	ribosomal protein S6	-2.75	0.001	XM_003586371.1		PIK3AP1	phosphoinositide-3-kinase adaptor protein 1	2.367	0.011	XM_002698411.2		CHD3	chromodomain helicase DNA binding protein 3	-2.405	0.006	XM_003587414.1								GLRX	glutaredoxin (thioltransferase)	-3.076	0.043	NM_001037604.1
CD79A	CD79a molecule, immunoglobulin-associated alpha	-2.574	0.01	NM_001191367.1								CRISP3	cysteine-rich secretory protein 3	-2.754	0.001	NM_001079635.1		DCAF6	DDB1 and CUL4 associated factor 6	2.366	0.011	NM_001191229.1		GDI2	GDP dissociation inhibitor 2	-2.406	0.006	NM_001033762.1								S100A11	S100 calcium binding protein A11	-3.08	0.042	NM_001098856.1
LOC534506	carbohydrate (N-acetylgalactosamine 4-sulfate 6-O) sulfotransferase 15	-2.574	0.01	NM_174266.3								ODC1	ornithine decarboxylase 1	-2.756	0.001	NM_174130.2		RPRD2	regulation of nuclear pre-mRNA domain containing 2	2.364	0.011	NM_001206187.1		LOC100297725	H3 histone, family 3A-like	-2.407	0.006	XM_002688923.2								TPM4	tropomyosin 4	-3.087	0.042	NM_001101162.1
RPS3A	ribosomal protein S3A	-2.579	0.01	XM_003587913.1								TBC1D25	TBC1 domain family, member 25	-2.756	0.001	NM_001205813.1		MAP4K3	mitogen-activated protein kinase kinase kinase kinase 3	2.354	0.011	NM_001191162.1		IFITM2	interferon induced transmembrane protein 2 (1-8D)	-2.409	0.006	NM_001078054.1								PUF60	poly-U binding splicing factor 60KDa	-3.092	0.041	NM_001046133.1
DTD1	D-tyrosyl-tRNA deacylase 1 homolog (S. cerevisiae)	-2.583	0.01	NM_001034038.1								LOC783185	microtubule-associated protein 1 light chain 3 beta pseudogene	-2.765	0.001	XR_084030.1		TNFAIP8	tumor necrosis factor, alpha-induced protein 8	2.354	0.011	NM_001083711.1		RPL23A	ribosomal protein L23a	-2.409	0.006	NM_001045958.1								DNAJB11	DnaJ (Hsp40) homolog, subfamily B, member 11	-3.093	0.041	NM_001034268.1
ACSL3	acyl-CoA synthetase long-chain family member 3	-2.585	0.009	NM_001038104.1								TUBA1A	tubulin, alpha 1a	-2.766	0.001	NM_001166505.1		PUM1	pumilio homolog 1 (Drosophila)	2.352	0.011	NM_001193123.1		EFHD2	EF-hand domain family, member D2	-2.41	0.006	NM_001103245.1								CGGBP1	CGG triplet repeat binding protein 1	-3.095	0.041	NM_001191137.2
TUBA1A	tubulin, alpha 1a	-2.589	0.009	NM_001205468.1								LOC614643	ribosomal protein L23a pseudogene	-2.767	0.001	XR_083624.1		GMDS	GDP-mannose 4,6-dehydratase	2.349	0.011	NM_001080331.1		PARK7	parkinson protein 7	-2.41	0.006	NM_001015572.1								LOC783641	ribosomal protein L12 pseudogene	-3.097	0.041	XM_003587379.1
ATF4	activating transcription factor 4 (tax-responsive enhancer element B67)	-2.596	0.009	NM_001166505.1								COX6C	cytochrome c oxidase subunit VIc	-2.769	0.001	XM_002690379.1		PIGK	phosphatidylinositol glycan anchor biosynthesis, class K	2.347	0.012	NM_001077880.1		LOC614922	heterogeneous nuclear ribonucleoprotein A1 pseudogene	-2.412	0.006	XM_003586990.1								SHC4	SHC (Src homology 2 domain containing) family, member 4	-3.099	0.04	NM_001205912.1
LOC100848718	uncharacterized LOC100848718	-2.598	0.009	NM_001034342.1								LOC789867	eukaryotic translation elongation factor 1 alpha 1 pseudogene	-2.769	0.001	XR_083807.1		LCOR	ligand dependent nuclear receptor corepressor	2.346	0.012	XM_002698412.2		MGC126945	uncharacterized protein MGC126945	-2.413	0.006	NM_001076983.1								TSPYL1	TSPY-like 1	-3.114	0.039	NM_001076111.1
PF4	platelet factor 4	-2.599	0.009	XM_003587098.1								GABARAPL2	GABA(A) receptor-associated protein-like 2	-2.774	0.001	NM_174675.2		KIAA0564	von Willebrand factor A domain containing 8	2.343	0.012	XM_002691823.1		TUBB1	tubulin, beta 1 class VI	-2.413	0.006	NM_001144100.1								GABARAP	GABA(A) receptor-associated protein	-3.116	0.039	NM_001034048.1
LOC613519	ribosomal protein L3 pseudogene	-2.6	0.009	NM_001101062.1								SLC23A1	solute carrier family 23 (ascorbic acid transporter), member 1	-2.774	0.001	XM_002689263.2		LOC100847265	rho-associated protein kinase 1-like	2.343	0.012	XM_003587771.1		PGD	phosphogluconate dehydrogenase	-2.414	0.006	NM_001143738.1								GLG1	golgi glycoprotein 1	-3.121	0.038	NM_001244140.1
LOC613460	ribosomal protein S3A pseudogene	-2.603	0.009	XR_083776.2								LOC787803	ribosomal protein S23-like	-2.779	0.001	XM_002700116.2		RSBN1	round spermatid basic protein 1	2.336	0.012	NM_001206227.1		CCDC146	coiled-coil domain containing 146	-2.416	0.005	NM_001205487.1								LOC100848571	uncharacterized LOC100848571	-3.122	0.038	XR_139606.1
C8H9orf80	chromosome 8 open reading frame, human C9orf80	-2.605	0.009	XR_083611.1								CLIC1	chloride intracellular channel 1	-2.787	0.001	NM_001015608.1		YWHAZ	tyrosine 3-monooxygenase/tryptophan 5-monooxygenase activation protein, zeta polypeptide	2.334	0.012	NM_174814.2		DUSP6	dual specificity phosphatase 6	-2.417	0.005	NM_001046195.1								MATR3	matrin 3	-3.122	0.038	NM_001102486.1
MYH9	myosin, heavy chain 9, non-muscle	-2.607	0.009	NM_001078064.1								RPLP0	ribosomal protein, large, P0	-2.79	0.001	NM_001012682.1		ZEB2	zinc finger E-box binding homeobox 2	2.333	0.012	NM_001076192.1		UBTF	upstream binding transcription factor, RNA polymerase I	-2.418	0.005	XM_003587451.1								LOC783378	nucleosome assembly protein 1-like 1 pseudogene	-3.124	0.038	XR_139284.1
RPS12	ribosomal protein S12	-2.608	0.009	NM_001192762.1								SLC2A3	solute carrier family 2 (facilitated glucose transporter), member 3	-2.79	0.001	NM_174603.3		NCK1	NCK adaptor protein 1	2.332	0.012	NM_001076072.1		UBTF	upstream binding transcription factor, RNA polymerase I	-2.418	0.005	XM_003587452.1								RPLP1	ribosomal protein, large, P1	-3.13	0.038	NM_001025340.1
LASP1	LIM and SH3 protein 1	-2.609	0.009	NM_001014387.1								LOC530077	GTPase IMAP family member 5-like	-2.81	0.001	XM_002687042.1		LRCH1	leucine-rich repeats and calponin homology (CH) domain containing 1	2.331	0.012	XM_002691830.1		HIST1H1E	histone cluster 1, H1e	-2.419	0.005	XM_002697518.1								MSN	moesin	-3.131	0.038	NM_001046477.1
YBX1	Y box binding protein 1	-2.611	0.009	NM_001035394.1								DDX6	DEAD (Asp-Glu-Ala-Asp) box polypeptide 6	-2.811	0.001	NM_001143867.1		LOC781886	zinc finger, C3H1-type containing	2.33	0.012	XM_003586031.1		LOC100138708	uncharacterized LOC100138708	-2.421	0.005	XM_002695836.2								RAB5C	RAB5C, member RAS oncogene family	-3.131	0.038	NM_001034743.2
SERBP1	SERPINE1 mRNA binding protein 1	-2.619	0.008	NM_174815.2								LOC100847811	60S ribosomal protein L24-like	-2.813	0.001	XR_139700.1		ZNF638	zinc finger protein 638	2.33	0.012	NM_001192476.1		ACTB	actin, beta	-2.422	0.005	NM_173979.3								ZC3H15	zinc finger CCCH-type containing 15	-3.134	0.037	NM_001046394.1
EEF2	eukaryotic translation elongation factor 2	-2.646	0.008	NM_001046449.1								RPL12	ribosomal protein L12	-2.82	0.001	NM_205797.1		GRAMD3	GRAM domain containing 3	2.328	0.012	NM_001079579.1		C16H1orf105	chromosome 16 open reading frame, human C1orf105	-2.425	0.005	NM_001205494.1								TPT1	tumor protein, translationally-controlled 1	-3.135	0.037	NM_001014388.1
DUSP1	dual specificity phosphatase 1	-2.659	0.007	NM_001075121.1								LOC100847759	uncharacterized LOC100847759	-2.824	0.001	XM_003586791.1		SFMBT1	Scm-like with four mbt domains 1	2.326	0.013	NM_001205711.1		GPX1	glutathione peroxidase 1	-2.425	0.005	NM_174076.3								EPRS	glutamyl-prolyl-tRNA synthetase	-3.137	0.037	NM_001243320.1
LOC100335666	uncharacterized LOC100335666	-2.661	0.007	NM_001046452.1								TUBA1B	tubulin, alpha 1b	-2.827	0.001	NM_001114856.1		CCDC109B	coiled-coil domain containing 109B	2.324	0.013	NM_001075171.1		FKBP1A	FK506 binding protein 1A, 12kDa	-2.427	0.005	NM_001035456.1								LOC782598	kinesin-like protein KIF20B-like	-3.141	0.037	XR_084009.1
HMGB2	high mobility group box 2	-2.67	0.007	XM_003587755.1								LOC100848479	uncharacterized LOC100848479	-2.832	0.001	XM_003587527.1		PIK3R1	phosphoinositide-3-kinase, regulatory subunit 1 (alpha)	2.323	0.013	NM_174575.1		SLC38A2	solute carrier family 38, member 2	-2.428	0.005	NM_001082424.1								LOC100300305	elongation factor 1-alpha, somatic form-like	-3.142	0.037	XM_002697497.2
LOC781381	nascent polypeptide-associated complex alpha subunit pseudogene	-2.67	0.007	NM_001037616.1								ENY2	enhancer of yellow 2 homolog (Drosophila)	-2.839	0.001	NM_001034747.1		GBF1	golgi brefeldin A resistant guanine nucleotide exchange factor 1	2.32	0.013	NM_001081600.1		FAM96A	family with sequence similarity 96, member A	-2.432	0.005	NM_001035110.1								LOC781576	mCG1723-like	-3.143	0.032	XM_003585885.1
RPL9	ribosomal protein L9	-2.67	0.007	XR_083742.2								LOC783838	eukaryotic translation elongation factor 1 alpha 1 pseudogene	-2.84	0.001	XR_083736.2		COL4A3BP	collagen, type IV, alpha 3 (Goodpasture antigen) binding protein	2.319	0.013	NM_174765.2		UBTF	upstream binding transcription factor, RNA polymerase I	-2.432	0.005	XM_002696042.2								CNOT7	CCR4-NOT transcription complex, subunit 7	-3.147	0.036	NM_001034312.1
EEF1B2	eukaryotic translation elongation factor 1 beta 2	-2.675	0.007	NM_001024469.2								LOC100848688	uncharacterized LOC100848688	-2.841	0.001	XR_139378.1		WDR7	WD repeat domain 7	2.319	0.013	NM_001206098.1		LOC100337138	uncharacterized LOC100337138	-2.433	0.005	XM_003587257.1								DOCK7	dedicator of cytokinesis 7	-3.148	0.036	NM_001192906.2
RPL3	ribosomal protein L3	-2.682	0.007	NM_001014936.1								LOC100295976	uncharacterized LOC100295976	-2.854	0.001	XM_002687287.2		CCDC57	coiled-coil domain containing 57	2.318	0.013	XM_002696133.2		UBA52	ubiquitin A-52 residue ribosomal protein fusion product 1	-2.434	0.005	NM_001076363.1								LOC784473	ribosomal protein S12 pseudogene	-3.148	0.036	XR_139324.1
MYEOV2	myeloma overexpressed 2	-2.685	0.007	NM_174715.1								TMBIM4	transmembrane BAX inhibitor motif containing 4	-2.858	0.001	NM_001014914.2		MAU2	MAU2 chromatid cohesion factor homolog (C. elegans)	2.315	0.013	XM_002688519.2		PGAM1	phosphoglycerate mutase 1 (brain)	-2.436	0.005	NM_001034054.1								RPLP2	ribosomal protein, large, P2	-3.151	0.036	NM_174788.3
EIF4B	eukaryotic translation initiation factor 4B	-2.694	0.006	NM_001195051.1								LOC618297	high mobility group protein B2-like	-2.863	0.001	XM_002686665.1		ATR	ataxia telangiectasia and Rad3 related	2.311	0.013	XM_002685057.2		ANP32B	acidic (leucine-rich) nuclear phosphoprotein 32 family, member B	-2.437	0.005	NM_001035074.1								C25H16orf73	meiosis specific with OB domains	-3.154	0.035	XM_002697856.1
CRISPLD2	cysteine-rich secretory protein LCCL domain containing 2	-2.699	0.006	NM_001035028.1								RPL36	ribosomal protein L36	-2.863	0.001	NM_001078139.1		SCFD1	sec1 family domain containing 1	2.31	0.013	NM_001191365.1		RPSA	ribosomal protein SA	-2.438	0.005	NM_174379.2								RPL27	ribosomal protein L27	-3.156	0.035	NM_001034051.1
RPL31	ribosomal protein L31	-2.711	0.006	NM_001100299.1								LOC508628	ribosomal protein S6 pseudogene	-2.869	0.001	NM_001015548.1		CREB1	cAMP responsive element binding protein 1	2.308	0.013	NM_174285.1		SNRPD3	small nuclear ribonucleoprotein D3 polypeptide 18kDa	-2.438	0.005	NM_001076479.1								CDKL4	cyclin-dependent kinase-like 4	-3.159	0.035	NM_001038129.1
DGKG	diacylglycerol kinase, gamma 90kDa	-2.713	0.006	NM_001025341.2								RPL23	ribosomal protein L23	-2.881	0.001	NM_001035014.1		LOC507055	guanylate binding protein 4-like	2.308	0.013	XM_002686269.2		TRIB1	tribbles homolog 1 (Drosophila)	-2.439	0.005	NM_001101105.1								USP1	ubiquitin specific peptidase 1	-3.161	0.035	NM_001046224.1
RPS17	ribosomal protein S17	-2.719	0.006	XM_002684869.1								RPL37A	ribosomal protein L37a	-2.885	0.001	NM_001035008.1		ZNF280D	zinc finger protein 280D	2.308	0.013	XM_002690858.2		LOC100299845	60S ribosomal protein L5-like	-2.441	0.005	XR_083789.2								CALR	calreticulin	-3.165	0.035	NM_174000.2
LOC508666	C-C motif chemokine 23	-2.725	0.006	NM_001099210.1								SELL	selectin L	-2.889	0.001	NM_174182.1		ARHGAP12	Rho GTPase activating protein 12	2.306	0.014	NM_001102241.1		CD97	CD97 molecule	-2.443	0.005	NM_176661.1								LOC783253	FCF1 small subunit-like	-3.166	0.035	XR_083796.1
RPS27A	ribosomal protein S27a	-2.727	0.006	NM_001244199.1								LOC783641	ribosomal protein L12 pseudogene	-2.894	0.001	XM_003587379.1		URI1	URI1, prefoldin-like chaperone	2.306	0.014	NM_001035305.1		TUBA4A	tubulin, alpha 4a	-2.449	0.005	NM_001078158.1								CENPE	centromere protein E, 312kDa	-3.169	0.034	XM_002688095.1
GNAI2	guanine nucleotide binding protein (G protein), alpha inhibiting activity polypeptide 2	-2.731	0.005	NM_174778.1								TOMM22	translocase of outer mitochondrial membrane 22 homolog (yeast)	-2.901	0	NM_001100335.1		ZNF410	zinc finger protein 410	2.304	0.014	NM_001034609.1		TPI1	triosephosphate isomerase 1	-2.45	0.005	NM_001013589.2								LOC790088	40S ribosomal protein S28-like	-3.169	0.034	XR_084093.2
RPS8	ribosomal protein S8	-2.731	0.005	NM_001101040.1								LTB	lymphotoxin beta (TNF superfamily, member 3)	-2.911	0	XM_002697371.1		ZNRF1	zinc and ring finger 1	2.303	0.014	NM_001192210.1		PDIA3	protein disulfide isomerase family A, member 3	-2.451	0.005	NM_174333.3								EXOC8	exocyst complex component 8	-3.17	0.034	NM_001098112.1
RPL32	ribosomal protein L32	-2.749	0.005	NM_001025317.1								LOC784473	ribosomal protein S12 pseudogene	-2.912	0	XR_139324.1		ATE1	arginyltransferase 1	2.301	0.014	XM_002698547.1		TP53	tumor protein p53	-2.451	0.005	NM_174201.2								PAPPA	pregnancy-associated plasma protein A, pappalysin 1	-3.173	0.034	XM_002689953.2
TMSB4X	thymosin beta 4, X-linked	-2.76	0.005	NM_001034783.1								RPL6	ribosomal protein L6	-2.921	0	NM_001031756.1		UBE2E3	ubiquitin-conjugating enzyme E2E 3	2.301	0.014	NM_001079783.1		HSP90B1	heat shock protein 90kDa beta (Grp94), member 1	-2.454	0.005	NM_174700.2								PDCD10	programmed cell death 10	-3.173	0.034	NM_001075259.1
ARHGAP30	Rho GTPase activating protein 30	-2.761	0.005	NM_001002885.1								H3F3B	H3 histone, family 3B	-2.933	0	NM_001242571.1		FAM149B1	family with sequence similarity 149, member B1	2.299	0.014	NM_001077994.1		LOC614643	ribosomal protein L23a pseudogene	-2.455	0.005	XR_083624.1								LOC100299201	ribosomal protein L23a pseudogene	-3.181	0.033	XR_084007.2
RPS16	ribosomal protein S16	-2.768	0.005	NM_001191499.1								PSME1	proteasome (prosome, macropain) activator subunit 1 (PA28 alpha)	-2.936	0	NM_001024509.2		PCBD2	pterin-4 alpha-carbinolamine dehydratase/dimerization cofactor of hepatocyte nuclear factor 1 alpha (TCF1) 2	2.299	0.014	XM_002689200.2		TKT	transketolase	-2.456	0.005	NM_001003906.1								TRPA1	transient receptor potential cation channel, subfamily A, member 1	-3.187	0.033	XM_002692726.2
CCDC72	coiled-coil domain containing 72	-2.781	0.004	NM_001033624.1								RPL27	ribosomal protein L27	-2.95	0	NM_001034051.1		ZBTB25	zinc finger and BTB domain containing 25	2.298	0.014	NM_001164023.1		ATP6V1E1	ATPase, H+ transporting, lysosomal 31kDa, V1 subunit E1	-2.457	0.005	NM_174810.2								CARD6	caspase recruitment domain family, member 6	-3.19	0.033	NM_001192521.1
TMSB4	thymosin beta 4, X-linked	-2.789	0.004	NM_001163803.1								RPL27A	ribosomal protein L27a	-2.951	0	NM_001024471.1		IL7	interleukin 7	2.297	0.014	NM_173924.2		PHF1	PHD finger protein 1	-2.457	0.005	NM_001098914.2								RPL23	ribosomal protein L23	-3.192	0.032	NM_001035014.1
LOC618297	high mobility group protein B2-like	-2.802	0.004	NM_001113231.1								LOC789587	ribosomal protein L17 pseudogene	-2.954	0	XR_139553.1		CSNK1G3	casein kinase 1, gamma 3	2.292	0.014	NM_001105329.2		LOC616840	ribosomal protein L3 pseudogene	-2.461	0.004	XR_083586.1								FEN1	flap structure-specific endonuclease 1	-3.194	0.032	NM_001035113.1
ACTG1	actin, gamma 1	-2.809	0.004	XM_002686665.1								LOC100847762	uncharacterized LOC100847762	-2.961	0	XR_139678.1		DENND4C	DENN/MADD domain containing 4C	2.287	0.015	XM_002689565.2		C3H1orf162	chromosome 3 open reading frame, human C1orf162	-2.463	0.004	XM_002686143.1								LOC781576	mCG1723-like	-3.194	0.036	XM_003585884.1
LOC785954	ribosomal protein S10 pseudogene	-2.809	0.004	NM_001033618.1								LOC782954	elongation factor 1-alpha 1-like	-2.967	0	XR_084029.1		CAMK1D	calcium/calmodulin-dependent protein kinase ID	2.286	0.015	XM_002692061.2		CALCOCO1	calcium binding and coiled-coil domain 1	-2.463	0.004	NM_001046435.1								LOC528224	olfactory receptor, family 7, subfamily G, member 3-like	-3.195	0.032	XM_002688797.2
CALM2	calmodulin 2 (phosphorylase kinase, delta)	-2.81	0.004	XR_083660.1								LOC100337180	eukaryotic translation elongation factor 1 alpha 1 pseudogene	-2.971	0	XR_139374.1		SFMBT2	Scm-like with four mbt domains 2	2.286	0.015	NM_001205956.1		NGRN	neugrin, neurite outgrowth associated	-2.463	0.004	NM_001045992.2								WDR55	WD repeat domain 55	-3.197	0.032	NM_001014873.1
RPS20	ribosomal protein S20	-2.822	0.004	NM_001242587.1								RPL17	ribosomal protein L17	-2.973	0	NM_001034459.1		WAC	WW domain containing adaptor with coiled-coil	2.283	0.015	XM_002692128.2		NGRN	neugrin, neurite outgrowth associated	-2.463	0.004	NR_028054.1								SSR2	signal sequence receptor, beta (translocon-associated protein beta)	-3.2	0.032	NM_001015533.1
RPS4X	ribosomal protein S4, X-linked	-2.831	0.004	NM_001034438.1								RPL19	ribosomal protein L19	-2.977	0.001	XM_002695953.1		CDK14	cyclin-dependent kinase 14	2.279	0.015	NM_001206776.1		RHOB	ras homolog gene family, member B	-2.464	0.004	NM_001077922.1								RPL31	ribosomal protein L31	-3.205	0.031	NM_001025341.2
LTB	lymphotoxin beta (TNF superfamily, member 3)	-2.839	0.004	NM_001035445.1								FGF18	fibroblast growth factor 18	-2.978	0	NM_001076007.1		COMMD10	COMM domain containing 10	2.279	0.015	NM_001083489.1		CALM2	calmodulin 2 (phosphorylase kinase, delta)	-2.465	0.004	NM_001242587.1								KRCC1	lysine-rich coiled-coil 1	-3.206	0.031	NM_001075303.1
SLC4A8	solute carrier family 4, sodium bicarbonate cotransporter, member 8	-2.857	0.003	XM_002697371.1								RPS16	ribosomal protein S16	-2.979	0	NM_001033624.1		C13H20orf94	chromosome 13 open reading frame, human C20orf94	2.278	0.015	XR_139445.1		PPP1R18	protein phosphatase 1, regulatory subunit 18	-2.466	0.004	NM_001076919.1								PTPN18	protein tyrosine phosphatase, non-receptor type 18 (brain-derived)	-3.208	0.031	NM_001078069.1
RPL34	ribosomal protein L34	-2.863	0.003	XM_002687293.2								LOC781576	mCG1723-like	-2.982	0	XM_003585885.1		GPBP1L1	GC-rich promoter binding protein 1-like 1	2.278	0.015	NM_001205575.1		CEBPD	CCAAT/enhancer binding protein (C/EBP), delta	-2.467	0.004	NM_174267.2								ZRANB2	zinc finger, RAN-binding domain containing 2	-3.208	0.031	NM_001105346.1
RPS28	ribosomal protein S28	-2.876	0.003	NM_001206221.1								LOC100847354	uncharacterized LOC100847354	-2.983	0	XM_003587372.1		TRA2A	transformer 2 alpha homolog (Drosophila)	2.278	0.015	NM_001046380.1		LOC100847602	uncharacterized LOC100847602	-2.467	0.004	XR_139313.1								PGAM1	phosphoglycerate mutase 1 (brain)	-3.209	0.031	NM_001034054.1
CD52	CD52 molecule	-2.879	0.003	NM_001025316.1								RPS12	ribosomal protein S12	-2.993	0	NM_001014387.1		CASD1	CAS1 domain containing 1	2.277	0.015	XM_002686656.2		EDA	ectodysplasin A	-2.469	0.004	NM_001081743.2								LOC787679	transmembrane protein 59 pseudogene	-3.211	0.031	XR_139454.1
PCSK6	proprotein convertase subtilisin/kexin type 6	-2.887	0.003	NM_001198996.1								LOC100848359	elongation factor 1-alpha 1-like	-3	0	XM_003587615.1		PHF14	PHD finger protein 14	2.275	0.015	XM_003585942.1		RPS13	ribosomal protein S13	-2.469	0.004	NM_001025342.2								C10H15orf24	chromosome 10 open reading frame, human C15orf24	-3.219	0.03	NM_001099143.1
HMGB1	high mobility group box 1	-2.901	0.003	XM_002696654.2								PJA2	praja ring finger 2	-3.011	0	NM_001100340.1		PPP1R21	protein phosphatase 1, regulatory subunit 21	2.272	0.015	NM_001103093.1		RPL28	ribosomal protein L28	-2.47	0.004	NM_001035503.1								RPL19	ribosomal protein L19	-3.228	0.013	NM_001040516.1
LOC100847811	60S ribosomal protein L24-like	-2.913	0.003	NM_176612.1								LOC100296205	ribosomal protein L36 pseudogene	-3.012	0	XR_083670.2		PTPN4	protein tyrosine phosphatase, non-receptor type 4 (megakaryocyte)	2.272	0.015	NM_001192946.1		LOC505564	KH-type splicing regulatory protein	-2.473	0.004	XM_003586266.1								PIGC	phosphatidylinositol glycan anchor biosynthesis, class C	-3.234	0.029	NM_001034383.1
LOC784572	suppressor of Ty 20 homolog (S. cerevisiae)	-2.925	0.003	XR_139700.1								RPLP2	ribosomal protein, large, P2	-3.04	0	NM_174788.3		RASGRP1	RAS guanyl releasing protein 1 (calcium and DAG-regulated)	2.271	0.015	NM_001144078.1		MTMR12	myotubularin related protein 12	-2.473	0.004	XM_002696402.2								LOC781339	heat shock protein 90kDa alpha (cytosolic), class A member 1 pseudogene	-3.239	0.029	XR_083814.1
PABPC1	poly(A) binding protein, cytoplasmic 1	-2.956	0.002	XM_002700336.1								LOC781576	mCG1723-like	-3.045	0	XM_003585884.1		AVEN	apoptosis, caspase activation inhibitor	2.267	0.016	XM_002690781.2		EIF4A1	eukaryotic translation initiation factor 4A1	-2.475	0.004	NM_001034228.1								SMC4	structural maintenance of chromosomes 4	-3.242	0.029	NM_001105326.2
LOC787404	ribosomal protein S20-like	-2.958	0.002	NM_174568.2								RPS10	ribosomal protein S10	-3.045	0	NM_001034716.1		TRPM7	transient receptor potential cation channel, subfamily M, member 7	2.267	0.016	NM_001206166.1		CFP	complement factor properdin	-2.476	0.004	NM_001076178.1								LOC789148	ras-related protein Rap-1b-like	-3.249	0.028	XM_003586274.1
RPS10	ribosomal protein S10	-3.033	0.002	XM_002697700.2								ACTG1	actin, gamma 1	-3.049	0	NM_001033618.1		C10H15orf41	chromosome 10 open reading frame, human C15orf41	2.266	0.016	NM_001015668.1		FAU	Finkel-Biskis-Reilly murine sarcoma virus (FBR-MuSV) ubiquitously expressed	-2.476	0.004	NM_174731.3								PIGF	phosphatidylinositol glycan anchor biosynthesis, class F	-3.254	0.028	NM_001077074.1
RPS7	ribosomal protein S7	-3.042	0.002	NM_001034716.1								LOC790088	40S ribosomal protein S28-like	-3.049	0	XR_084093.2		RHOH	ras homolog gene family, member H	2.266	0.016	NM_001078124.1		RPS27	ribosomal protein S27	-2.476	0.008	NM_001098135.2								CHCHD2	coiled-coil-helix-coiled-coil-helix domain containing 2	-3.256	0.027	NM_001034746.1
LFNG	LFNG O-fucosylpeptide 3-beta-N-acetylglucosaminyltransferase	-3.071	0.001	NM_001098874.1								EIF4B	eukaryotic translation initiation factor 4B	-3.073	0	NM_001035028.1		LRCH3	leucine-rich repeats and calponin homology (CH) domain containing 3	2.265	0.016	XM_002684799.2		CALR	calreticulin	-2.478	0.004	NM_174000.2								LOC100847459	uncharacterized LOC100847459	-3.256	0.027	XM_003586189.1
RARA	retinoic acid receptor, alpha	-3.118	0.001	NM_001046222.1								WDR31	WD repeat domain 31	-3.076	0	XM_002689937.2		BRE	brain and reproductive organ-expressed (TNFRSF1A modulator)	2.264	0.016	NM_001102274.1		ADAT1	adenosine deaminase, tRNA-specific 1	-2.481	0.004	NM_001081620.1								LOC100297647	translationally-controlled tumor protein-like	-3.261	0.027	XM_002690912.2
CDC2L1	cell division cycle 2-like 1 (PITSLRE proteins)	-3.12	0.001	NM_001014942.2								C9H6orf170	TBC1 domain family, member 32	-3.088	0	XM_002690075.1		SAMHD1	SAM domain and HD domain 1	2.264	0.016	NM_001075861.1		CETN3	centrin, EF-hand protein, 3	-2.481	0.004	NM_001075976.1								SELK	selenoprotein K	-3.264	0.027	NM_001037489.2
RPL21	ribosomal protein L21	-3.197	0.001	NM_001007811.2								UQCRH	ubiquinol-cytochrome c reductase hinge protein	-3.091	0	NM_001034745.1		AIDA	axin interactor, dorsalization associated	2.262	0.016	NM_001205634.1		CD37	CD37 molecule	-2.484	0.004	NM_001046011.1								FGL2	fibrinogen-like 2	-3.268	0.027	NM_001046097.1
RPS23	ribosomal protein S23	-3.226	0.001	NM_001191412.1								LOC100299845	60S ribosomal protein L5-like	-3.094	0	XR_083789.2		TTLL5	tubulin tyrosine ligase-like family, member 5	2.261	0.023	XM_002691095.1		FGL2	fibrinogen-like 2	-2.484	0.004	NM_001046097.1								LAPTM5	lysosomal protein transmembrane 5	-3.269	0.027	NM_001046118.1
WDR1	WD repeat domain 1	-3.23	0.001	NM_001034690.1								SLC4A8	solute carrier family 4, sodium bicarbonate cotransporter, member 8	-3.094	0	XM_002687293.2		ZFAND6	zinc finger, AN1-type domain 6	2.258	0.016	NM_001034460.1		GANAB	glucosidase, alpha; neutral AB	-2.486	0.004	NM_001205777.1								RAB27A	RAB27A, member RAS oncogene family	-3.27	0.026	NM_001101270.1
RPL11	ribosomal protein L11	-3.271	0.001	NM_001046346.1								ITM2B	integral membrane protein 2B	-3.113	0	NM_001035093.1		SESN3	sestrin 3	2.257	0.016	XM_002692957.2		LOC100299317	60S ribosomal protein L23a-like	-2.488	0.004	XR_083581.1								IL8	interleukin 8	-3.274	0.026	NM_173925.2
RPL4	ribosomal protein L4	-3.585	0	NM_001075581.1								LOC781813	eukaryotic translation elongation factor 1 alpha 1 pseudogene	-3.119	0	XR_083620.2		UBR2	ubiquitin protein ligase E3 component n-recognin 2	2.251	0.017	NM_001192638.1		KCNA3	potassium voltage-gated channel, shaker-related subfamily, member 3	-2.493	0.004	XM_002686146.1								LOC100848296	uncharacterized LOC100848296	-3.274	0.026	XR_139389.1
CDH23	cadherin-related 23	-3.66	0	NM_001014894.1								RPL26	ribosomal protein L26	-3.127	0	NM_001015512.2		VPS54	vacuolar protein sorting 54 homolog (S. cerevisiae)	2.251	0.017	NM_001105460.1		TFE3	transcription factor binding to IGHM enhancer 3	-2.494	0.004	NM_001075811.2								ARL6IP1	ADP-ribosylation factor-like 6 interacting protein 1	-3.278	0.026	NM_001078157.1
				NM_001191206.1								SERBP1	SERPINE1 mRNA binding protein 1	-3.131	0	NM_001046449.1		PSMF1	proteasome (prosome, macropain) inhibitor subunit 1 (PI31)	2.25	0.017	NM_001076478.1		CERS2	ceramide synthase 2	-2.496	0.004	NM_001034667.1								LOC100337215	peptidylprolyl isomerase A (cyclophilin A)-like	-3.278	0.026	XM_002690515.2
												RPL21	ribosomal protein L21	-3.152	0	NM_001191412.1		TCF4	transcription factor 4	2.248	0.017	NM_001034621.1		LOC616200	glyceraldehyde-3-phosphate dehydrogenase-like	-2.496	0.004	XM_002684914.2								SRD5A3	steroid 5 alpha-reductase 3	-3.278	0.026	NM_001206090.1
												RPS28	ribosomal protein S28	-3.152	0	NM_001025316.1		WWOX	WW domain containing oxidoreductase	2.247	0.017	NM_001078092.1		IL2RG	interleukin 2 receptor, gamma	-2.497	0.004	NM_174359.1								EIF5B	eukaryotic translation initiation factor 5B	-3.282	0.026	XM_003586607.1
												PCSK6	proprotein convertase subtilisin/kexin type 6	-3.165	0	XM_002696654.2		HERC2	HECT and RLD domain containing E3 ubiquitin protein ligase 2	2.245	0.017	NM_001206081.1		LOC782776	eukaryotic translation elongation factor 1 alpha 1 pseudogene	-2.498	0.004	XR_083578.2								ATF4	activating transcription factor 4 (tax-responsive enhancer element B67)	-3.297	0.025	NM_001034342.1
												RPL37	ribosomal protein L37	-3.19	0	NM_001078132.1		LOC100336880	lysine (K)-specific demethylase 2A-like	2.243	0.017	XM_002699395.1		VASP	vasodilator-stimulated phosphoprotein	-2.498	0.004	NM_001038110.1								TOM1L1	target of myb1 (chicken)-like 1	-3.298	0.024	NM_001075611.1
												DNAI1	dynein, axonemal, intermediate chain 1	-3.197	0	NM_001038142.1		C8H9orf5	transmembrane protein 245	2.241	0.017	XM_002689911.1		CNBP	CCHC-type zinc finger, nucleic acid binding protein	-2.5	0.004	NM_001034224.1								DAD1	defender against cell death 1	-3.299	0.024	NM_001034761.1
												EEF1B2	eukaryotic translation elongation factor 1 beta 2	-3.198	0	NM_001014936.1		PCBP1	poly(rC) binding protein 1	-2.226	0.018	NM_001015565.1		RFXAP	regulatory factor X-associated protein	-2.5	0.004	XM_002691750.2								ACTR3	ARP3 actin-related protein 3 homolog (yeast)	-3.3	0.024	NM_174226.2
												GIMAP7	GTPase, IMAP family member 7	-3.201	0	NM_001046308.1		TSC22D3	TSC22 domain family, member 3	-2.226	0.018	NM_001103342.1		ATP5G3	ATP synthase, H+ transporting, mitochondrial Fo complex, subunit C3 (subunit 9)	-2.502	0.004	NM_001034692.1								FHL1	four and a half LIM domains 1	-3.301	0.024	NM_001113258.1
												LOC618220	ribosomal protein L6 pseudogene	-3.23	0	XR_083644.2		THOC4	THO complex 4	-2.227	0.018	NM_001035417.1		LOC100847890	uncharacterized LOC100847890	-2.503	0.002	XR_139676.1								ATXN7L3B	ataxin 7-like 3B	-3.305	0.024	NM_001078161.2
												LOC100848296	uncharacterized LOC100848296	-3.233	0	XR_139389.1		HNRNPA1L2	heterogeneous nuclear ribonucleoprotein A1-like 2	-2.228	0.018	XM_002685402.2		UCP2	uncoupling protein 2 (mitochondrial, proton carrier)	-2.503	0.004	NM_001033611.1								LOC788405	ribosomal protein L12 pseudogene	-3.306	0.024	XR_139580.1
												ZNF197	zinc finger protein 197	-3.255	0	NM_001206813.1		HSPA12B	heat shock 70kD protein 12B	-2.228	0.018	NM_001102027.1		PFN1	profilin 1	-2.504	0.004	NM_001015592.1								HSP90AA1	heat shock protein 90kDa alpha (cytosolic), class A member 1	-3.309	0.024	NM_001012670.2
												ARL6IP1	ADP-ribosylation factor-like 6 interacting protein 1	-3.261	0	NM_001078157.1		ANP32B	acidic (leucine-rich) nuclear phosphoprotein 32 family, member B	-2.229	0.018	NM_001035074.1		PPP1R8	protein phosphatase 1, regulatory subunit 8	-2.504	0.004	NM_174582.2								MTDH	metadherin	-3.309	0.024	NM_001046038.1
												RPL13A	ribosomal protein L13a	-3.263	0	NM_001076998.1		PCDHGA8	protocadherin gamma subfamily A, 8	-2.229	0.018	NM_001099705.1		MYADM	myeloid-associated differentiation marker	-2.505	0.004	NM_001075252.1								RPL36AL	ribosomal protein L36a-like	-3.309	0.024	NM_001079508.1
												LOC100848193	uncharacterized LOC100848193	-3.264	0	XM_003587667.1		CSPG5	chondroitin sulfate proteoglycan 5 (neuroglycan C)	-2.231	0.018	NM_001075229.1		TMSB10	thymosin beta 10	-2.505	0.004	NM_174623.2								GIMAP7	GTPase, IMAP family member 7	-3.311	0.024	NM_001046308.1
												LOC782021	ribosomal protein L21 pseudogene	-3.268	0	XR_084028.1		LOC100848934	tubulin alpha-1C chain-like	-2.231	0.018	XM_003586057.1		TPM4	tropomyosin 4	-2.505	0.004	NM_001101162.1								DEK	DEK oncogene	-3.312	0.024	NM_001099717.1
												RPL10A	ribosomal protein L10a	-3.271	0	NM_001015647.1		LGALS9	lectin, galactoside-binding, soluble, 9	-2.235	0.018	XM_002695663.2		CEP120	centrosomal protein 120kDa	-2.508	0.004	NM_001078000.1								CDKN2D	cyclin-dependent kinase inhibitor 2D (p19, inhibits CDK4)	-3.315	0.024	NM_001046050.1
												RPS17	ribosomal protein S17	-3.285	0	NM_001099210.1		LST1	leukocyte specific transcript 1	-2.235	0.02	XM_002697374.1		IRF2BP2	interferon regulatory factor 2 binding protein 2	-2.509	0.004	XM_002698810.1								LOC100847202	uncharacterized LOC100847202	-3.316	0.023	XR_139370.1
												FAU	Finkel-Biskis-Reilly murine sarcoma virus (FBR-MuSV) ubiquitously expressed	-3.295	0	NM_174731.3		RPL38	ribosomal protein L38	-2.235	0.018	NM_001113309.1		PPIG	peptidylprolyl isomerase G (cyclophilin G)	-2.509	0.004	NM_001109807.1								CD52	CD52 molecule	-3.317	0.023	NM_001198996.1
												ACSL3	acyl-CoA synthetase long-chain family member 3	-3.296	0	NM_001205468.1		TRRAP	transformation/transcription domain-associated protein	-2.237	0.018	NM_001192137.1		HECA	headcase homolog (Drosophila)	-2.511	0.004	XM_002690282.2								LOC783185	microtubule-associated protein 1 light chain 3 beta pseudogene	-3.329	0.023	XR_084030.1
												RPS3A	ribosomal protein S3A	-3.298	0	NM_001034038.1		SRSF2	serine/arginine-rich splicing factor 2	-2.24	0.017	NM_001034318.1		ACSL4	acyl-CoA synthetase long-chain family member 4	-2.514	0.004	XM_002699866.1								MYL6	myosin, light chain 6, alkali, smooth muscle and non-muscle	-3.33	0.023	NM_175780.1
												RPL31	ribosomal protein L31	-3.303	0	NM_001025341.2		S1PR1	sphingosine-1-phosphate receptor 1	-2.241	0.017	NM_001013585.3		CDC42	cell division cycle 42 (GTP binding protein, 25kDa)	-2.516	0.004	NM_001046332.1								HSPA8	heat shock 70kDa protein 8	-3.333	0.023	NM_174345.3
												EDA	ectodysplasin A	-3.323	0	NM_001081743.2		SLX1A	SLX1 structure-specific endonuclease subunit homolog A (S. cerevisiae)	-2.243	0.017	NM_001037456.1		PTMA	prothymosin, alpha (gene sequence 28)	-2.517	0.004	XM_003585780.1								LOC787803	ribosomal protein S23-like	-3.333	0.023	XM_002700116.2
												LOC100299317	60S ribosomal protein L23a-like	-3.352	0	XR_083581.1		SNRPD3	small nuclear ribonucleoprotein D3 polypeptide 18kDa	-2.251	0.017	NM_001076479.1		PTMA	prothymosin, alpha (gene sequence 28)	-2.517	0.004	XM_003585781.1								SBDS	Shwachman-Bodian-Diamond syndrome	-3.334	0.022	NM_001034439.1
												RPL13	ribosomal protein L13	-3.364	0	NM_001015543.1		RRAGA	Ras-related GTP binding A	-2.252	0.017	NM_001035499.1		ACAD10	acyl-CoA dehydrogenase family, member 10	-2.518	0.004	NM_001192292.1								HNRNPAB	heterogeneous nuclear ribonucleoprotein A/B	-3.337	0.022	NM_001040522.1
												RPS23	ribosomal protein S23	-3.411	0	NM_001034690.1		SLC25A3	solute carrier family 25 (mitochondrial carrier; phosphate carrier), member 3	-2.253	0.017	NM_174657.2		EIF4G2	eukaryotic translation initiation factor 4 gamma, 2	-2.518	0.004	NM_001099859.1								LOC782609	nucleosome assembly protein 1-like 1-like	-3.339	0.022	XM_002707812.2
												RPS8	ribosomal protein S8	-3.413	0	NM_001025317.1		MYL9	myosin, light chain 9, regulatory	-2.254	0.017	NM_001075234.1		TBC1D25	TBC1 domain family, member 25	-2.52	0.003	NM_001205813.1								SLC25A3	solute carrier family 25 (mitochondrial carrier; phosphate carrier), member 3	-3.342	0.022	NM_174657.2
												SLC16A7	solute carrier family 16, member 7 (monocarboxylic acid transporter 2)	-3.419	0	NM_001076336.2		KRCC1	lysine-rich coiled-coil 1	-2.256	0.016	NM_001075303.1		DDX3X	DEAD (Asp-Glu-Ala-Asp) box polypeptide 3, X-linked	-2.521	0.003	NM_001192962.1								LOC614785	nucleosome assembly protein 1-like 1 pseudogene	-3.343	0.022	XR_083699.2
												RPL32	ribosomal protein L32	-3.478	0	NM_001034783.1		HELB	helicase (DNA) B	-2.259	0.016	NM_001206182.1		VAT1L	vesicle amine transport protein 1 homolog (T. californica)-like	-2.521	0.003	NM_001046624.1								HMGCS1	HMGCS1 protein-like	-3.346	0.022	NM_001206578.1
												CDC2L1	cell division cycle 2-like 1 (PITSLRE proteins)	-3.507	0	NM_001007811.2		RAP2B	RAP2B, member of RAS oncogene family	-2.259	0.016	NM_001102531.1		LOC781224	H3 histone, family 3A-like	-2.523	0.003	XM_003586223.1								RPL37	ribosomal protein L37	-3.347	0.022	NM_001078132.1
												LOC100848780	uncharacterized LOC100848780	-3.507	0	XM_003586094.1		C21H15orf63	chromosome 21 open reading frame, human C15orf63	-2.261	0.016	NM_001206386.1		PRDX3	peroxiredoxin 3	-2.524	0.003	NM_174432.2								LOC782470	tropomyosin 1 (alpha) pseudogene	-3.349	0.022	XR_083734.2
												LOC784572	suppressor of Ty 20 homolog (S. cerevisiae)	-3.518	0	XM_002700336.1		POLR1D	polymerase (RNA) I polypeptide D, 16kDa	-2.263	0.016	NM_001076144.1		ARHGDIB	Rho GDP dissociation inhibitor (GDI) beta	-2.525	0.003	NM_175797.2								PDHB	pyruvate dehydrogenase (lipoamide) beta	-3.353	0.021	NM_001035435.2
												RPL4	ribosomal protein L4	-3.523	0	NM_001014894.1		SELL	selectin L	-2.263	0.016	NM_174182.1		CD82	CD82 molecule	-2.525	0.003	NM_001097990.1								FHL1	four and a half LIM domains 1	-3.356	0.02	NM_001113259.1
												LOC787404	ribosomal protein S20-like	-3.524	0	XM_002697700.2		NOLC1	nucleolar and coiled-body phosphoprotein 1	-2.265	0.016	NM_001075608.1		SOD1	superoxide dismutase 1, soluble	-2.525	0.003	NM_174615.2								LOC100848479	uncharacterized LOC100848479	-3.356	0.021	XM_003587527.1
												STMN1	stathmin 1	-3.53	0	NM_001034790.1		TAPBP	TAP binding protein (tapasin)	-2.265	0.016	NM_001045885.1		LOC508666	C-C motif chemokine 23	-2.526	0.003	NM_001244199.1								C14H8orf45	minichromosome maintenance domain containing 2	-3.36	0.021	XM_002692690.2
												RPS24	ribosomal protein S24	-3.539	0	NM_001025339.1		ERH	enhancer of rudimentary homolog (Drosophila)	-2.269	0.016	NM_001034336.1		COX5B	cytochrome c oxidase subunit Vb	-2.527	0.003	NM_001034046.1								LOC782527	tripartite motif protein 5 alpha-like	-3.361	0.021	XR_083754.2
												LOC613460	ribosomal protein S3A pseudogene	-3.6	0	XR_083611.1		LOC100297522	60S ribosomal protein L38-like	-2.271	0.015	XM_003585703.1		FMNL1	formin-like 1	-2.528	0.003	XM_002696051.1								LOC785386	ribosomal protein L10-like	-3.365	0.021	XM_002687966.1
												PRKAR2A	protein kinase, cAMP-dependent, regulatory, type II, alpha	-3.658	0	NM_001191367.1		IMP4	IMP4, U3 small nucleolar ribonucleoprotein, homolog (yeast)	-2.272	0.015	NM_001075617.1		TCN1	transcobalamin I (vitamin B12 binding protein, R binder family)	-2.529	0.003	NM_001193105.1								ACAD10	acyl-CoA dehydrogenase family, member 10	-3.368	0.021	NM_001192292.1
												RPL5	ribosomal protein L5	-3.671	0	NM_001035306.1		UBE2Q1	ubiquitin-conjugating enzyme E2Q family member 1	-2.275	0.015	NM_001206320.1		HMGN5	high mobility group nucleosome binding domain 5	-2.53	0.003	XM_002699936.2								ANP32B	acidic (leucine-rich) nuclear phosphoprotein 32 family, member B	-3.375	0.02	NM_001035074.1
												RPS7	ribosomal protein S7	-3.696	0	NM_001098874.1		LOC100848920	regulator of G-protein signaling 2-like	-2.276	0.015	XM_003587052.1		PF4	platelet factor 4	-2.531	0.003	NM_001101062.1								WDR31	WD repeat domain 31	-3.377	0.02	XM_002689937.2
												DTD1	D-tyrosyl-tRNA deacylase 1 homolog (S. cerevisiae)	-3.722	0	NM_001038104.1		LOC614789	60S ribosomal protein L23a-like	-2.277	0.015	XR_083630.1		PPIA	peptidylprolyl isomerase A (cyclophilin A)	-2.534	0.001	XM_002690516.1								EIF4B	eukaryotic translation initiation factor 4B	-3.38	0.02	NM_001035028.1
												RPS4X	ribosomal protein S4, X-linked	-3.744	0	NM_001035445.1		TP53	tumor protein p53	-2.279	0.015	NM_174201.2		TSPYL1	TSPY-like 1	-2.534	0.003	NM_001076111.1								NT5C3	5'-nucleotidase, cytosolic III	-3.381	0.005	XM_002688366.1
												CD52	CD52 molecule	-3.767	0	NM_001198996.1		LOC515517	la-related protein 1B-like	-2.28	0.015	XM_003587132.1		CTDSP2	CTD (carboxy-terminal domain, RNA polymerase II, polypeptide A) small phosphatase 2	-2.537	0.003	NM_001045935.2								NKAP	NFKB activating protein	-3.385	0.02	NM_001205809.1
												RPL11	ribosomal protein L11	-3.767	0	NM_001075581.1		CDIPT	CDP-diacylglycerol--inositol 3-phosphatidyltransferase	-2.282	0.015	NM_001034482.1		UBA1	ubiquitin-like modifier activating enzyme 1	-2.537	0.003	NM_001102477.1								RPL13	ribosomal protein L13	-3.385	0.02	NM_001015543.1
												RPS27A	ribosomal protein S27a	-3.79	0	NM_174778.1		GIMAP7	GTPase, IMAP family member 7	-2.282	0.015	NM_001046308.1		LOC100847899	uncharacterized LOC100847899	-2.551	0.003	XR_139262.1								FHL1	four and a half LIM domains 1	-3.387	0.021	NM_001034341.1
												TMSB4X	thymosin beta 4, X-linked	-3.899	0	NM_001002885.1		ATXN7L3	ataxin 7-like 3	-2.283	0.015	NM_001192608.1		CMTM3	CKLF-like MARVEL transmembrane domain containing 3	-2.555	0.003	NM_001099399.1								YBX1	Y box binding protein 1	-3.388	0.02	NM_174815.2
												RPS25	ribosomal protein S25	-3.906	0	NM_001025315.1		LOC782938	eukaryotic translation initiation factor 4 gamma 2-like	-2.283	0.015	XR_083698.2		INPPL1	inositol polyphosphate phosphatase-like 1	-2.556	0.003	NM_001191176.1								C15H11orf46	chromosome 15 open reading frame, human C11orf46	-3.39	0.02	NM_001031761.2
												RPL34	ribosomal protein L34	-4.008	0	NM_001206221.1		TARM1	T cell-interacting, activating receptor on myeloid cells 1	-2.284	0.015	XM_002695517.1		TAPBP	TAP binding protein (tapasin)	-2.557	0.003	NM_001045885.1								ZFP36L2	zinc finger protein 36, C3H type-like 2	-3.395	0.019	NM_001191191.1
												LOC784243	ribosomal protein L34 pseudogene	-4.036	0	XR_139437.1		TROAP	trophinin associated protein (tastin)	-2.285	0.015	NM_001024477.1		IL1B	interleukin 1, beta	-2.558	0.003	NM_174093.1								RPS12	ribosomal protein S12	-3.397	0.019	NM_001014387.1
												TMSB4	thymosin beta 4, X-linked	-4.055	0	NM_001113231.1		ZDHHC7	zinc finger, DHHC-type containing 7	-2.288	0.015	XM_002694749.2		LOC100337180	eukaryotic translation elongation factor 1 alpha 1 pseudogene	-2.558	0.003	XR_139374.1								BMPR2	bone morphogenetic protein receptor, type II (serine/threonine kinase)	-3.404	0.019	XM_002685492.1
												CCDC72	coiled-coil domain containing 72	-4.056	0	NM_001163803.1		RNF220	ring finger protein 220	-2.295	0.014	NM_001076941.1		HEXIM1	hexamethylene bis-acetamide inducible 1	-2.564	0.003	NM_001076181.2								COX6C	cytochrome c oxidase subunit VIc	-3.404	0.019	XM_002690379.1
												RPS20	ribosomal protein S20	-4.118	0	NM_001034438.1		FAM96A	family with sequence similarity 96, member A	-2.297	0.014	NM_001035110.1		RPN1	ribophorin I	-2.564	0.003	NM_001082605.1								LOC100849002	uncharacterized LOC100849002	-3.404	0.008	XM_003586114.1
																		LOC511937	annexin A1 pseudogene	-2.3	0.014	XR_083847.2		VIM	vimentin	-2.565	0.003	NM_173969.3								NXPH1	neurexophilin 1	-3.408	0.019	NM_001034762.1
																		TKDP5	trophoblast Kunitz domain protein 5	-2.301	0.014	XM_003586852.1		LOC534506	carbohydrate (N-acetylgalactosamine 4-sulfate 6-O) sulfotransferase 15	-2.566	0.003	XM_003587913.1								LOC782688	SET nuclear oncogene pseudogene	-3.411	0.018	XR_084108.2
																		UBD	ubiquitin D	-2.302	0.014	NM_001206473.1		RPS9	ribosomal protein S9	-2.566	0.003	NM_001101152.1								EVI2A	ecotropic viral integration site 2A	-3.418	0.018	NM_001034568.1
																		FKBP2	FK506 binding protein 2, 13kDa	-2.305	0.013	NM_001037481.1		TNFSF14	tumor necrosis factor (ligand) superfamily, member 14	-2.566	0.003	NM_001101855.1								LOC100847762	uncharacterized LOC100847762	-3.419	0.018	XR_139678.1
																		SAMD4B	sterile alpha motif domain containing 4B	-2.308	0.012	XM_002694984.2		HSP90AB1	heat shock protein 90kDa alpha (cytosolic), class B member 1	-2.567	0.003	NM_001079637.1								RPS16	ribosomal protein S16	-3.419	0.018	NM_001033624.1
																		ACER3	alkaline ceramidase 3	-2.31	0.013	NM_001102285.1		TG	thyroglobulin	-2.568	0.003	NM_173883.2-1								LOC100138864	eukaryotic translation initiation factor 4A2 pseudogene	-3.42	0.018	XR_083821.2
																		ATP5G3	ATP synthase, H+ transporting, mitochondrial Fo complex, subunit C3 (subunit 9)	-2.31	0.013	NM_001034692.1		HIST2H2AC	histone cluster 2, H2ac	-2.572	0.003	NM_001081720.1								LOC784087	nuclear casein kinase and cyclin-dependent kinase substrate 1 pseudogene	-3.424	0.018	XR_083845.1
																		AK2	adenylate kinase 2	-2.311	0.013	NM_173889.1		LOC613460	ribosomal protein S3A pseudogene	-2.573	0.003	XR_083611.1								FAM188A	family with sequence similarity 188, member A	-3.429	0.018	NM_001076107.1
																		SEPX1	selenoprotein X, 1	-2.311	0.013	NM_001034810.2		CCR1	chemokine (C-C motif) receptor 1	-2.574	0.003	NM_001077839.1								SUB1	SUB1 homolog (S. cerevisiae)	-3.435	0.017	NM_001105407.1
																		FKBP2	FK506 binding protein 2, 13kDa	-2.312	0.014	NM_001113256.1		CTDNEP1	CTD nuclear envelope phosphatase 1	-2.575	0.003	NM_001046026.1								HMGN4	high mobility group nucleosomal binding domain 4	-3.449	0.017	NM_001046547.1
																		HDGF	hepatoma-derived growth factor	-2.316	0.013	NM_175832.2		FAIM3	Fas apoptotic inhibitory molecule 3	-2.578	0.003	XM_002693895.2								SH3BGRL	SH3 domain binding glutamic acid-rich protein like	-3.45	0.017	NM_001035440.1
																		ARL6IP1	ADP-ribosylation factor-like 6 interacting protein 1	-2.317	0.013	NM_001078157.1		RPL14	ribosomal protein L14	-2.578	0.003	NM_001034674.1								H3F3A	H3 histone, family 3A	-3.462	0.016	NM_001014389.2
																		ACADVL	acyl-CoA dehydrogenase, very long chain	-2.319	0.013	NM_174494.2		MYO1F	myosin IF	-2.581	0.003	NM_001192748.1								RPL10	ribosomal protein L10	-3.464	0.016	NM_174760.2
																		LOC404103	spleen trypsin inhibitor	-2.32	0.013	NM_205786.1		PBXIP1	pre-B-cell leukemia homeobox interacting protein 1	-2.585	0.003	NM_001075265.1								RGS18	regulator of G-protein signaling 18	-3.466	0.016	NM_001192971.1
																		FAM53C	family with sequence similarity 53, member C	-2.321	0.013	NM_001046366.1		LOC100294894	uncharacterized LOC100294894	-2.587	0.003	XM_002685990.1								LOC100847811	60S ribosomal protein L24-like	-3.471	0.016	XR_139700.1
																		CD97	CD97 molecule	-2.322	0.013	NM_176661.1		PFKFB3	6-phosphofructo-2-kinase/fructose-2,6-biphosphatase 3	-2.588	0.003	NM_001077837.1								LRRC36	leucine rich repeat containing 36	-3.475	0.015	NM_001192321.1
																		LOC614207	eukaryotic translation initiation factor 5B-like	-2.326	0.013	XR_084141.1		C8H9orf80	chromosome 8 open reading frame, human C9orf80	-2.591	0.003	NM_001078064.1								CEBPZ	CCAAT/enhancer binding protein (C/EBP), zeta	-3.477	0.015	NM_001083386.1
																		LRP1	low density lipoprotein receptor-related protein 1	-2.328	0.012	XM_003586078.1		CAPNS1	calpain, small subunit 1	-2.591	0.003	NM_174261.1								LOC100848505	uncharacterized LOC100848505	-3.479	0.015	XR_139400.1
																		SLA	Src-like-adaptor	-2.328	0.012	NM_001024533.2		RPL24	ribosomal protein L24	-2.591	0.003	NM_174455.2								HSP90AB1	heat shock protein 90kDa alpha (cytosolic), class B member 1	-3.481	0.015	NM_001079637.1
																		TPRG1L	tumor protein p63 regulated 1-like	-2.328	0.012	NM_001076418.2		LOC100848479	uncharacterized LOC100848479	-2.592	0.003	XM_003587527.1								RPL35A	ribosomal protein L35a	-3.485	0.015	NM_001025321.2
																		LOC100847377	uncharacterized LOC100847377	-2.331	0.024	XR_139721.1		SEPHS2	selenophosphate synthetase 2	-2.592	0.003	NM_001114732.1								RPL17	ribosomal protein L17	-3.489	0.015	NM_001034459.1
																		NFKBIA	nuclear factor of kappa light polypeptide gene enhancer in B-cells inhibitor, alpha	-2.331	0.012	NM_001045868.1		MSL1	male-specific lethal 1 homolog (Drosophila)	-2.594	0.003	XM_002695963.2								RPS7	ribosomal protein S7	-3.494	0.015	NM_001098874.1
																		CCDC146	coiled-coil domain containing 146	-2.333	0.012	NM_001205487.1		SNRNP200	small nuclear ribonucleoprotein 200kDa (U5)	-2.594	0.003	NM_001206163.1								H2AFZ	H2A histone family, member Z	-3.495	0.015	NM_174809.2
																		C2H1orf38	thymocyte selection associated family member 2	-2.334	0.012	XM_002685688.2		DDX39A	DEAD (Asp-Glu-Ala-Asp) box polypeptide 39A	-2.595	0.003	NM_001034752.1								RGS20	regulator of G-protein signaling 20	-3.496	0.015	NM_001076327.1
																		CMTM3	CKLF-like MARVEL transmembrane domain containing 3	-2.336	0.012	NM_001099399.1		SMARCC2	SWI/SNF related, matrix associated, actin dependent regulator of chromatin, subfamily c, member 2	-2.595	0.003	NM_001172224.1								UQCRH	ubiquinol-cytochrome c reductase hinge protein	-3.514	0.014	NM_001034745.1
																		SAMD4B	sterile alpha motif domain containing 4B	-2.337	0.013	XM_003587253.1		UBE2Q1	ubiquitin-conjugating enzyme E2Q family member 1	-2.595	0.003	NM_001206320.1								UBD	ubiquitin D	-3.53	0.013	NM_001206473.1
																		ATF6B	activating transcription factor 6 beta	-2.338	0.012	NM_001083683.1		RSRC2	arginine/serine-rich coiled-coil 2	-2.597	0.002	NM_001102146.1								SMC3	structural maintenance of chromosomes 3	-3.533	0.013	NM_174295.1
																		CMTM6	CKLF-like MARVEL transmembrane domain containing 6	-2.34	0.012	NM_001035066.1		ZBTB4	zinc finger and BTB domain containing 4	-2.597	0.002	NM_001206898.1								SQLE	squalene epoxidase	-3.534	0.013	NM_001098061.1
																		LAMP1	lysosomal-associated membrane protein 1	-2.34	0.012	NM_001075124.1		PRDX2	peroxiredoxin 2	-2.602	0.002	NM_174763.2								CFL1	cofilin 1 (non-muscle)	-3.54	0.013	NM_001015655.1
																		CCDC18	coiled-coil domain-containing protein 18-like	-2.342	0.012	XM_002686232.1		TNFRSF1A	tumor necrosis factor receptor superfamily, member 1A	-2.603	0.002	NM_174674.2								RPL19	ribosomal protein L19	-3.545	0.03	XM_002695953.1
																		CTNNA1	catenin (cadherin-associated protein), alpha 1, 102kDa	-2.342	0.012	NM_001035366.1-1		C7H19orf22	R3H domain containing 4	-2.605	0.002	NM_001046548.1								LOC100847354	uncharacterized LOC100847354	-3.549	0.012	XM_003587372.1
																		SUPT6H	suppressor of Ty 6 homolog (S. cerevisiae)	-2.345	0.012	NM_001193126.1		DOPEY2	dopey family member 2	-2.606	0.002	XM_002685151.1								IK	IK cytokine, down-regulator of HLA II	-3.55	0.012	NM_001103349.1
																		VAMP3	vesicle-associated membrane protein 3 (cellubrevin)	-2.345	0.012	NM_001045915.1		C15H11orf46	chromosome 15 open reading frame, human C11orf46	-2.608	0.002	NM_001031761.2								RPS24	ribosomal protein S24	-3.552	0.012	NM_001025339.1
																		LOC781022	ferritin, heavy polypeptide 1 pseudogene	-2.348	0.012	XR_084136.1		ANP32E	acidic (leucine-rich) nuclear phosphoprotein 32 family, member E	-2.609	0.002	NM_001075306.1								PDIA3	protein disulfide isomerase family A, member 3	-3.554	0.012	NM_174333.3
																		ATP5B	ATP synthase, H+ transporting, mitochondrial F1 complex, beta polypeptide	-2.35	0.011	NM_175796.2		CCR7	chemokine (C-C motif) receptor 7	-2.61	0.002	NM_001024930.2								TKDP5	trophoblast Kunitz domain protein 5	-3.554	0.012	XM_003586852.1
																		AIF1	allograft inflammatory factor 1	-2.352	0.011	NM_173985.2		LOC782525	eukaryotic translation elongation factor 1 gamma pseudogene	-2.611	0.002	XR_083733.1								GLRX2	glutaredoxin 2	-3.558	0.012	NM_001040523.1
																		UCP2	uncoupling protein 2 (mitochondrial, proton carrier)	-2.354	0.011	NM_001033611.1		PPP1R10	protein phosphatase 1, regulatory subunit 10	-2.612	0.002	NM_001143863.1								RPL26	ribosomal protein L26	-3.56	0.012	NM_001015512.2
																		SEPHS2	selenophosphate synthetase 2	-2.356	0.011	NM_001114732.1		FTH1	ferritin, heavy polypeptide 1	-2.616	0.002	NM_174062.3								FAU	Finkel-Biskis-Reilly murine sarcoma virus (FBR-MuSV) ubiquitously expressed	-3.562	0.012	NM_174731.3
																		DACH1	dachshund homolog 1 (Drosophila)	-2.358	0.011	XM_002691884.2		COPZ2	coatomer protein complex, subunit zeta 2	-2.618	0.002	NM_001206922.1								B2M	beta-2-microglobulin-like	-3.565	0.005	XM_002691119.1
																		VAT1	vesicle amine transport protein 1 homolog (T. californica)	-2.359	0.011	NM_001192265.1		S100A4	S100 calcium binding protein A4	-2.621	0.002	NM_174595.2								RPL9	ribosomal protein L9	-3.568	0.012	NM_001024469.2
																		MYL12A	myosin, light chain 12A, regulatory, non-sarcomeric	-2.36	0.011	NM_001015640.2		LOC100848780	uncharacterized LOC100848780	-2.622	0.002	XM_003586094.1								RPL37A	ribosomal protein L37a	-3.573	0.012	NM_001035008.1
																		PA2G4	proliferation-associated 2G4, 38kDa	-2.362	0.011	NM_001034699.1		SLA	Src-like-adaptor	-2.631	0.002	NM_001024533.2								ZDHHC2	zinc finger, DHHC-type containing 2	-3.573	0.012	XM_002698681.2
																		RBM8A	RNA binding motif protein 8A	-2.362	0.011	NM_001035324.1		LOC100847417	uncharacterized LOC100847417	-2.632	0.002	XM_003586919.1								LOC404103	spleen trypsin inhibitor	-3.578	0.012	NM_205786.1
																		PSMB6	proteasome (prosome, macropain) subunit, beta type, 6	-2.366	0.011	NM_001034369.1		CRISPLD2	cysteine-rich secretory protein LCCL domain containing 2	-2.636	0.002	NM_001100299.1								RPL11	ribosomal protein L11	-3.578	0.012	NM_001075581.1
																		EXOC8	exocyst complex component 8	-2.368	0.011	NM_001098112.1		EHD3	EH-domain containing 3	-2.638	0.002	NM_001098004.1								SAP18	Sin3A-associated protein, 18kDa	-3.584	0.012	NM_001035467.2
																		LOC100141266	tubulin alpha-1C chain-like	-2.368	0.011	XM_003586052.1		LITAF	lipopolysaccharide-induced TNF factor	-2.638	0.002	NM_001046252.1								PPIG	peptidylprolyl isomerase G (cyclophilin G)	-3.591	0.011	NM_001109807.1
																		LOC511386	nucleophosmin-like	-2.368	0.011	XM_002686718.1		EEF1A1	eukaryotic translation elongation factor 1 alpha 1	-2.639	0.002	NM_174535.1								ATP5B	ATP synthase, H+ transporting, mitochondrial F1 complex, beta polypeptide	-3.593	0.011	NM_175796.2
																		C5AR1	complement component 5a receptor 1	-2.37	0.011	NM_001007810.3		TIMM13	translocase of inner mitochondrial membrane 13 homolog (yeast)	-2.639	0.002	NM_001080277.1								LOC100848780	uncharacterized LOC100848780	-3.593	0.011	XM_003586094.1
																		FBL	fibrillarin	-2.371	0.011	NM_001205400.1		CFL1	cofilin 1 (non-muscle)	-2.641	0.002	NM_001015655.1								RAD21	RAD21 homolog (S. pombe)	-3.6	0.011	NM_001034717.1
																		TPM1	tropomyosin 1 (alpha)	-2.373	0.01	NM_001013590.2		LOC618220	ribosomal protein L6 pseudogene	-2.646	0.002	XR_083644.2								RPL12	ribosomal protein L12	-3.602	0.011	NM_205797.1
																		NFE2L1	nuclear factor (erythroid-derived 2)-like 1	-2.374	0.01	NM_001102515.1		RASSF5	Ras association (RalGDS/AF-6) domain family member 5	-2.646	0.002	NM_001113760.2								LOC613519	ribosomal protein L3 pseudogene	-3.63	0.01	XR_083776.2
																		LOC100847759	uncharacterized LOC100847759	-2.375	0.01	XM_003586791.1		MIDN	midnolin	-2.647	0.002	XM_002689146.2								ANP32E	acidic (leucine-rich) nuclear phosphoprotein 32 family, member E	-3.631	0.01	NM_001075306.1
																		C3H1orf162	chromosome 3 open reading frame, human C1orf162	-2.376	0.01	XM_002686143.1		SCD	stearoyl-CoA desaturase (delta-9-desaturase)	-2.65	0.002	NM_173959.4								BTG1	B-cell translocation gene 1, anti-proliferative	-3.632	0.01	NM_173999.2
																		C3H1orf162	chromosome 3 open reading frame, human C1orf162	-2.376	0.01	XM_003585873.1		CCT3	chaperonin containing TCP1, subunit 3 (gamma)	-2.651	0.002	NM_001017934.2								MYL12A	myosin, light chain 12A, regulatory, non-sarcomeric	-3.64	0.01	NM_001015640.2
																		COX7A2L	cytochrome c oxidase subunit VIIa polypeptide 2 like	-2.376	0.01	NM_001034695.1		HDAC7	histone deacetylase 7	-2.653	0.002	NM_001193141.1								PGK1	phosphoglycerate kinase 1	-3.658	0.01	NM_001034299.1
																		HN1L	hematological and neurological expressed 1-like	-2.376	0.01	NM_001081546.1		HMGN4	high mobility group nucleosomal binding domain 4	-2.654	0.002	NM_001046547.1								LOC614207	eukaryotic translation initiation factor 5B-like	-3.668	0.009	XR_084141.1
																		SRRT	serrate RNA effector molecule homolog (Arabidopsis)	-2.376	0.01	NM_001083708.1		EXOSC10	exosome component 10	-2.655	0.002	NM_001102186.1								LRRC16A	leucine rich repeat containing 16A	-3.676	0.009	NM_001192903.1
																		WDR55	WD repeat domain 55	-2.377	0.01	NM_001014873.1		ZFP36	zinc finger protein 36, C3H type, homolog (mouse)	-2.656	0.002	NM_174493.1								MOV10L1	Mov10l1, Moloney leukemia virus 10-like 1, homolog (mouse)	-3.676	0.009	XM_002687999.2
																		CCDC56	coiled-coil domain containing 56	-2.378	0.01	NM_001034683.1		LOC782688	SET nuclear oncogene pseudogene	-2.661	0.002	XR_084108.2								HMGB2	high mobility group box 2	-3.677	0.009	NM_001037616.1
																		HNRNPA0	heterogeneous nuclear ribonucleoprotein A0	-2.379	0.01	XM_002689195.1		C7H19orf43	chromosome 7 open reading frame, human C19orf43	-2.662	0.002	NM_001083371.1								CALM	calmodulin-like	-3.685	0.009	NM_001166508.1
																		PGK1	phosphoglycerate kinase 1	-2.38	0.01	NM_001034299.1		C11H2orf49	chromosome 11 open reading frame, human C2orf49	-2.665	0.002	NM_001081539.1								NCL	nucleolin	-3.693	0.009	NM_001206660.1
																		ANAPC13	anaphase promoting complex subunit 13	-2.381	0.009	NM_001113229.1		RPL15	ribosomal protein L15	-2.665	0.002	NM_001077866.1								LOC511386	nucleophosmin-like	-3.7	0.008	XM_002686718.1
																		CEP120	centrosomal protein 120kDa	-2.382	0.01	NM_001078000.1		UTP14A	UTP14, U3 small nucleolar ribonucleoprotein, homolog A-like	-2.665	0	NM_001034241.1								LOC782938	eukaryotic translation initiation factor 4 gamma 2-like	-3.703	0.008	XR_083698.2
																		LOC789192	cyclin-G1-like	-2.382	0.01	XM_002683813.1		GIMAP6	GTPase, IMAP family member 6	-2.666	0.002	NM_001099712.1								PEBP1	phosphatidylethanolamine binding protein 1	-3.703	0.008	NM_001033623.1
																		SERPINE1	serpin peptidase inhibitor, clade E (nexin, plasminogen activator inhibitor type 1), member 1	-2.382	0.01	NM_174137.2		DNAI1	dynein, axonemal, intermediate chain 1	-2.668	0.002	NM_001038142.1								C8H9orf80	chromosome 8 open reading frame, human C9orf80	-3.706	0.008	NM_001078064.1
																		ABHD14A	abhydrolase domain containing 14A	-2.383	0.01	XM_002697067.2		LOC787803	ribosomal protein S23-like	-2.669	0.002	XM_002700116.2								LOC100849002	uncharacterized LOC100849002	-3.707	0.019	XM_003586113.1
																		HNRNPH2	heterogeneous nuclear ribonucleoprotein H2 (H')	-2.383	0.01	NM_001076008.1		LOC100847890	uncharacterized LOC100847890	-2.67	0.004	XR_139677.1								LOC613460	ribosomal protein S3A pseudogene	-3.727	0.008	XR_083611.1
																		TFE3	transcription factor binding to IGHM enhancer 3	-2.386	0.01	NM_001075811.2		RPL23	ribosomal protein L23	-2.674	0.002	NM_001035014.1								NRAS	neuroblastoma RAS viral (v-ras) oncogene homolog	-3.734	0.008	NM_001097989.1
																		RHOB	ras homolog gene family, member B	-2.387	0.01	NM_001077922.1		TSC22D3	TSC22 domain family, member 3	-2.675	0.002	NM_001103342.1								RPS27A	ribosomal protein S27a	-3.734	0.008	NM_174778.1
																		PRR5L	proline rich 5 like	-2.389	0.01	NM_001015519.1		RPS15	ribosomal protein S15	-2.677	0.002	NM_001024541.1								LOC100848913	uncharacterized LOC100848913	-3.746	0.007	XR_139376.1
																		ARHGDIB	Rho GDP dissociation inhibitor (GDI) beta	-2.39	0.01	NM_175797.2		COX4I1	cytochrome c oxidase subunit IV isoform 1	-2.678	0.002	NM_001001439.2								RPS3A	ribosomal protein S3A	-3.746	0.007	NM_001034038.1
																		VPS25	vacuolar protein sorting 25 homolog (S. cerevisiae)	-2.391	0.01	NM_001015657.2		HNRNPU	heterogeneous nuclear ribonucleoprotein U (scaffold attachment factor A)	-2.679	0.002	NM_001076920.2								CNBP	CCHC-type zinc finger, nucleic acid binding protein	-3.752	0.007	NM_001034224.1
																		AES	amino-terminal enhancer of split	-2.395	0.01	NM_001128497.1		FAM53C	family with sequence similarity 53, member C	-2.681	0.002	NM_001046366.1								HMGB1	high mobility group box 1	-3.753	0.007	NM_176612.1
																		CETN3	centrin, EF-hand protein, 3	-2.396	0.01	NM_001075976.1		RCC2	regulator of chromosome condensation 2	-2.681	0.002	NM_001101911.2								RPS20	ribosomal protein S20	-3.754	0.007	NM_001034438.1
																		SYS1	SYS1 Golgi-localized integral membrane protein homolog (S. cerevisiae)	-2.396	0.01	NM_001046527.1		RNASEH2C	ribonuclease H2, subunit C	-2.682	0.002	NM_001045921.1								MFAP3	microfibrillar-associated protein 3	-3.757	0.007	NM_001166519.1
																		CFP	complement factor properdin	-2.397	0.01	NM_001076178.1		RAN	RAN, member RAS oncogene family	-2.684	0.002	NM_001034705.1								EIF4G2	eukaryotic translation initiation factor 4 gamma, 2	-3.763	0.007	NM_001099859.1
																		CCR3	chemokine (C-C motif) receptor 3	-2.398	0.01	NM_001194960.1		LOC100847870	uncharacterized LOC100847870	-2.687	0.05	XR_139318.1								RPL27A	ribosomal protein L27a	-3.777	0.007	NM_001024471.1
																		NUDT7	nudix (nucleoside diphosphate linked moiety X)-type motif 7	-2.399	0.01	NM_001109788.1		NENF	neudesin neurotrophic factor	-2.687	0.002	NM_001076419.1								SYF2	SYF2 homolog, RNA splicing factor (S. cerevisiae)	-3.784	0.007	XM_002685769.2
																		OSTM1	osteopetrosis associated transmembrane protein 1	-2.401	0.009	NM_001075776.1		TNFRSF1B	tumor necrosis factor receptor superfamily, member 1B	-2.69	0.002	NM_001040490.1								PTMA	prothymosin, alpha (gene sequence 28)	-3.785	0.001	NM_001039953.1
																		SPAG7	sperm associated antigen 7	-2.401	0.01	NM_001038543.1		C13H20orf108	family with sequence similarity 210, member B	-2.693	0.002	NM_001080278.1								LOC515517	la-related protein 1B-like	-3.798	0.006	XM_003587132.1
																		TNFRSF1A	tumor necrosis factor receptor superfamily, member 1A	-2.403	0.009	NM_174674.2		EXOC8	exocyst complex component 8	-2.695	0.002	NM_001098112.1								ADAT1	adenosine deaminase, tRNA-specific 1	-3.8	0.006	NM_001081620.1
																		IL1B	interleukin 1, beta	-2.404	0.009	NM_174093.1		ODC1	ornithine decarboxylase 1	-2.696	0.002	NM_174130.2								LDHA	lactate dehydrogenase A	-3.802	0.006	NM_174099.2
																		CD82	CD82 molecule	-2.409	0.009	NM_001097990.1		EEF1B2	eukaryotic translation elongation factor 1 beta 2	-2.698	0.002	NM_001014936.1								FUT10	fucosyltransferase 10 (alpha (1,3) fucosyltransferase)	-3.807	0.006	NM_182987.1
																		RPL29	ribosomal protein L29	-2.409	0.009	NM_001014862.2		LOC787301	transforming growth factor, beta receptor III-like	-2.706	0.001	XM_002688837.2								LOC787404	ribosomal protein S20-like	-3.814	0.006	XM_002697700.2
																		NCR3	natural cytotoxicity triggering receptor 3	-2.41	0.009	NM_001040524.1		SLC25A3	solute carrier family 25 (mitochondrial carrier; phosphate carrier), member 3	-2.707	0.001	NM_174657.2								ATRX	alpha thalassemia/mental retardation syndrome X-linked	-3.823	0.006	XM_002699982.2
																		ANAPC13	anaphase promoting complex subunit 13	-2.413	0.01	NM_001113234.1		RPS14	ribosomal protein S14	-2.708	0.001	NM_001077830.1								ATRX	alpha thalassemia/mental retardation syndrome X-linked	-3.823	0.006	XM_002699983.2
																		BASP1	brain abundant, membrane attached signal protein 1	-2.413	0.009	NM_174780.3		WDR31	WD repeat domain 31	-2.713	0.001	XM_002689937.2								LOC782021	ribosomal protein L21 pseudogene	-3.831	0.006	XR_084028.1
																		KLF6	Kruppel-like factor 6	-2.414	0.009	NM_001035271.2		FCER1G	Fc fragment of IgE, high affinity I, receptor for; gamma polypeptide	-2.722	0.001	NM_174537.2								METTL5	methyltransferase like 5	-3.834	0.006	NM_001099135.1
																		HMGN4	high mobility group nucleosomal binding domain 4	-2.415	0.009	NM_001046547.1		ATP5H	ATP synthase, H+ transporting, mitochondrial Fo complex, subunit d	-2.723	0.001	NM_174724.3								HSPA5	heat shock 70kDa protein 5 (glucose-regulated protein, 78kDa)	-3.836	0.006	NM_001075148.1
																		PRELID1	PRELI domain containing 1	-2.415	0.009	NM_001038138.1		CALM3	calmodulin 3 (phosphorylase kinase, delta)	-2.725	0.001	NM_001046249.1								UQCRB	ubiquinol-cytochrome c reductase binding protein	-3.854	0.005	NM_001034797.1
																		CHRNA2	cholinergic receptor, nicotinic, alpha 2 (neuronal)	-2.417	0.009	NM_001192710.2		LOC616281	polyadenylate-binding protein 2-like	-2.725	0.001	XR_139551.1								CCDC18	coiled-coil domain-containing protein 18-like	-3.857	0.005	XM_002686232.1
																		SEH1L	SEH1-like (S. cerevisiae)	-2.417	0.009	NM_001103089.1		ANKRD11	ankyrin repeat domain 11	-2.726	0.001	XM_002694765.1								B2M	beta-2-microglobulin-like	-3.866	0.012	NM_173893.3
																		TALDO1	transaldolase 1	-2.417	0.009	NM_001035283.2		EEF1G	eukaryotic translation elongation factor 1 gamma	-2.726	0.001	NM_001040487.1								LOC789192	cyclin-G1-like	-3.867	0.005	XM_002683813.1
																		C13H20orf108	family with sequence similarity 210, member B	-2.418	0.009	NM_001080278.1		LOC782954	elongation factor 1-alpha 1-like	-2.727	0.001	XR_084029.1								LOC100848406	uncharacterized LOC100848406	-3.876	0.002	XR_139406.1
																		LOC100848726	uncharacterized LOC100848726	-2.42	0.009	XM_003588066.1		NRAS	neuroblastoma RAS viral (v-ras) oncogene homolog	-2.729	0.001	NM_001097989.1								SMARCA5	SWI/SNF related, matrix associated, actin dependent regulator of chromatin, subfamily a, member 5	-3.876	0.005	NM_001105416.1
																		DNMT1	DNA (cytosine-5-)-methyltransferase 1	-2.422	0.009	NM_182651.2		NOLC1	nucleolar and coiled-body phosphoprotein 1	-2.73	0.001	NM_001075608.1								H3F3B	H3 histone, family 3B	-3.88	0.005	NM_001242571.1
																		LGMN	legumain	-2.425	0.009	NM_174101.2		VAT1	vesicle amine transport protein 1 homolog (T. californica)	-2.73	0.001	NM_001192265.1								EDA	ectodysplasin A	-3.881	0.005	NM_001081743.2
																		SNRPD2	small nuclear ribonucleoprotein D2 polypeptide 16.5kDa	-2.425	0.009	NM_001034476.1		BRD4	bromodomain containing 4	-2.732	0.001	XM_002688561.2								KARS	lysyl-tRNA synthetase	-3.887	0.005	NM_001034356.1
																		ANKRD11	ankyrin repeat domain 11	-2.426	0.009	XM_002694765.1		HDAC1	histone deacetylase 1	-2.732	0.001	NM_001037444.1								MRFAP1	Morf4 family associated protein 1	-3.889	0.005	NM_001035344.1
																		IRF1	interferon regulatory factor 1	-2.427	0.009	NM_001191261.2		B2M	beta-2-microglobulin-like	-2.734	0.019	NM_173893.3								LOC786726	heterogeneous nuclear ribonucleoprotein K pseudogene	-3.902	0.005	XR_083865.1
																		MFNG	MFNG O-fucosylpeptide 3-beta-N-acetylglucosaminyltransferase	-2.428	0.009	NM_001101051.1		CCNG1	cyclin G1	-2.736	0.001	NM_001013364.1								NT5C3	5'-nucleotidase, cytosolic III	-3.918	0.02	NM_001037597.1
																		PIM1	pim-1 oncogene	-2.428	0.009	NM_174144.2		DDIT4	DNA-damage-inducible transcript 4	-2.737	0.001	NM_001075922.1								BZW1	basic leucine zipper and W2 domains 1	-3.923	0.004	NM_001206613.1
																		PHB2	prohibitin 2	-2.432	0.009	NM_001046198.1		LOC100138326	CD24 antigen	-2.738	0.001	XM_003585775.1								TIFA	TRAF-interacting protein with forkhead-associated domain	-3.923	0.004	NM_001081621.1
																		CCDC58	coiled-coil domain containing 58	-2.433	0.008	NM_001083389.1		TP53INP1	tumor protein p53 inducible nuclear protein 1	-2.738	0.001	NM_001205423.1								LOC100337180	eukaryotic translation elongation factor 1 alpha 1 pseudogene	-3.924	0.004	XR_139374.1
																		PPIA	peptidylprolyl isomerase A (cyclophilin A)	-2.433	0.003	XM_002690516.1		RPS27A	ribosomal protein S27a	-2.74	0.001	NM_174778.1								PSME1	proteasome (prosome, macropain) activator subunit 1 (PA28 alpha)	-3.924	0.004	NM_001024509.2
																		UBR7	ubiquitin protein ligase E3 component n-recognin 7 (putative)	-2.434	0.008	NM_001082601.1		ARRB2	arrestin, beta 2	-2.745	0.001	NM_001205277.1								RPL15	ribosomal protein L15	-3.933	0.004	NM_001077866.1
																		HIRIP3	HIRA interacting protein 3	-2.435	0.008	NM_001192296.1		LOC100296121	zinc finger protein 132-like	-2.745	0.001	XM_002695444.2								RPL21	ribosomal protein L21	-3.934	0.004	NM_001191412.1
																		LINGO2	leucine rich repeat and Ig domain containing 2	-2.435	0.008	XM_002689490.2		LOC789018	ribosomal protein L23a pseudogene	-2.746	0.001	XR_139713.1								VAMP3	vesicle-associated membrane protein 3 (cellubrevin)	-3.945	0.004	NM_001045915.1
																		FGL2	fibrinogen-like 2	-2.436	0.008	NM_001046097.1		BOLA-NC1	non-classical MHC class I antigen	-2.747	0.001	NM_001105616.1								RPL10A	ribosomal protein L10a	-3.956	0.004	NM_001015647.1
																		POMP	proteasome maturation protein	-2.437	0.008	NM_001034376.1		UBE2V1	ubiquitin-conjugating enzyme E2 variant 1	-2.747	0.001	NM_001035497.1								HSPE1	heat shock 10kDa protein 1 (chaperonin 10)	-3.962	0.004	NM_174346.2
																		BCL6	B-cell CLL/lymphoma 6	-2.44	0.008	NM_001206450.1		DDX5	DEAD (Asp-Glu-Ala-Asp) box polypeptide 5	-2.749	0.001	NM_001191395.1								LOC100848193	uncharacterized LOC100848193	-3.981	0.004	XM_003587667.1
																		ANXA1	annexin A1	-2.442	0.008	NM_175784.3		FGF18	fibroblast growth factor 18	-2.751	0.001	NM_001076007.1								PRKAR2A	protein kinase, cAMP-dependent, regulatory, type II, alpha	-3.991	0.004	NM_001191367.1
																		FGR	Gardner-Rasheed feline sarcoma viral (v-fgr) oncogene homolog	-2.442	0.008	NM_001098991.1		LOC781576	mCG1723-like	-2.751	0	XM_003585885.1								TOP2A	topoisomerase (DNA) II alpha 170kDa	-4	0.003	XM_002696009.2
																		LOC788696	RAN, member RAS oncogene family pseudogene	-2.451	0.008	XR_083779.2		ARPC2	actin related protein 2/3 complex, subunit 2, 34kDa	-2.752	0.001	NM_001034713.1								RPS8	ribosomal protein S8	-4.007	0.003	NM_001025317.1
																		DAZAP2	DAZ associated protein 2	-2.452	0.008	NM_001034701.1		EIF5A	eukaryotic translation initiation factor 5A	-2.752	0.001	NM_001003658.2								RPS28	ribosomal protein S28	-4.015	0.003	NM_001025316.1
																		CITED2	Cbp/p300-interacting transactivator, with Glu/Asp-rich carboxy-terminal domain, 2	-2.454	0.008	NM_001075819.1		NONO	non-POU domain containing, octamer-binding	-2.753	0.001	NM_001046554.1								LOC100848625	uncharacterized LOC100848625	-4.032	0.003	XR_139294.1
																		TPM3	tropomyosin 3	-2.454	0.008	NM_001011674.1		DYNLT3	dynein, light chain, Tctex-type 3	-2.764	0.001	NM_001101220.1								TUBA1A	tubulin, alpha 1a	-4.041	0.003	NM_001166505.1
																		CALM1	calmodulin 1 (phosphorylase kinase, delta)	-2.455	0.008	NM_001242572.1		CHD4	chromodomain helicase DNA binding protein 4	-2.767	0.001	NM_001206501.1								PJA2	praja ring finger 2	-4.042	0.003	NM_001100340.1
																		PSME3	proteasome (prosome, macropain) activator subunit 3 (PA28 gamma; Ki)	-2.456	0.008	XM_002696000.2		PPP1R15B	protein phosphatase 1, regulatory subunit 15B	-2.767	0.001	XM_002693904.2								LINGO2	leucine rich repeat and Ig domain containing 2	-4.043	0.003	XM_002689490.2
																		LOC504548	ubiquitin D-like	-2.464	0.008	XM_002697377.1		TMBIM4	transmembrane BAX inhibitor motif containing 4	-2.767	0.001	NM_001014914.2								CALM2	calmodulin 2 (phosphorylase kinase, delta)	-4.049	0.003	NM_001242587.1
																		RPN1	ribophorin I	-2.464	0.008	NM_001082605.1		AES	amino-terminal enhancer of split	-2.768	0.001	NM_001128497.1								ACTG1	actin, gamma 1	-4.069	0.003	NM_001033618.1
																		CDKL4	cyclin-dependent kinase-like 4	-2.465	0.008	NM_001038129.1		G3BP2	GTPase activating protein (SH3 domain) binding protein 2	-2.77	0.001	NM_001046455.1								CRISP3	cysteine-rich secretory protein 3	-4.082	0.003	NM_001079635.1
																		MAPK1	mitogen-activated protein kinase 1	-2.465	0.007	NM_175793.2		LOC100848571	uncharacterized LOC100848571	-2.77	0.001	XR_139606.1								HSP90B1	heat shock protein 90kDa beta (Grp94), member 1	-4.101	0.003	NM_174700.2
																		BTG1	B-cell translocation gene 1, anti-proliferative	-2.468	0.007	NM_173999.2		LOC100848625	uncharacterized LOC100848625	-2.776	0.001	XR_139294.1								EVI2B	ecotropic viral integration site 2B	-4.105	0.003	NM_001099166.1
																		SLC16A7	solute carrier family 16, member 7 (monocarboxylic acid transporter 2)	-2.469	0.007	NM_001076336.2		RPS5	ribosomal protein S5	-2.78	0.001	NM_001015531.1								CCDC72	coiled-coil domain containing 72	-4.108	0.003	NM_001163803.1
																		TCTN1	tectonic family member 1	-2.471	0.007	NM_001046056.2		EPB41	erythrocyte membrane protein band 4.1 (elliptocytosis 1, RH-linked)	-2.782	0.001	NM_174311.1								LOC783376	ribosomal protein L7 pseudogene	-4.108	0.003	XR_083601.1
																		BLCAP	bladder cancer associated protein	-2.472	0.007	NM_174250.3		CDC42SE1	CDC42 small effector 1	-2.784	0.001	NM_001035112.1								MFAP1	microfibrillar-associated protein 1	-4.113	0.003	NM_001034397.1
																		CD74	CD74 molecule, major histocompatibility complex, class II invariant chain	-2.472	0.007	NM_001034735.1		LOC616063	myeloid-associated differentiation marker-like	-2.784	0.001	XM_003587544.1								RPS17	ribosomal protein S17	-4.114	0.003	NM_001099210.1
																		HSPA8	heat shock 70kDa protein 8	-2.472	0.007	NM_174345.3		RPL35A	ribosomal protein L35a	-2.789	0.001	NM_001025321.2								LOC100138326	CD24 antigen	-4.116	0.002	XM_003585775.1
																		CTDNEP1	CTD nuclear envelope phosphatase 1	-2.473	0.007	NM_001046026.1		NFE2L1	nuclear factor (erythroid-derived 2)-like 1	-2.798	0.001	NM_001102515.1								ACER3	alkaline ceramidase 3	-4.127	0.002	NM_001102285.1
																		S100A9	S100 calcium binding protein A9	-2.474	0.007	NM_001046328.1		HSPA8	heat shock 70kDa protein 8	-2.804	0.001	NM_174345.3								LOC785568	mortality factor 4 like 1 pseudogene	-4.129	0.002	XR_083597.2
																		FKBP1A	FK506 binding protein 1A, 12kDa	-2.475	0.007	NM_001035456.1		ITM2C	integral membrane protein 2C	-2.804	0.001	NM_001081538.1								CAPRIN1	cell cycle associated protein 1	-4.147	0.002	NM_001076062.1
																		SLC44A2	solute carrier family 44, member 2	-2.475	0.007	NM_001098139.1		PGK1	phosphoglycerate kinase 1	-2.804	0.001	NM_001034299.1								LOC100848406	uncharacterized LOC100848406	-4.15	0.005	XR_139405.1
																		PEA15	phosphoprotein enriched in astrocytes 15	-2.476	0.007	NM_001075456.1		LOC789867	eukaryotic translation elongation factor 1 alpha 1 pseudogene	-2.806	0.001	XR_083807.1								LOC784572	suppressor of Ty 20 homolog (S. cerevisiae)	-4.15	0.002	XM_002700336.1
																		PTP4A2	protein tyrosine phosphatase type IVA, member 2	-2.48	0.007	NM_001104998.1		EIF3D	eukaryotic translation initiation factor 3, subunit D	-2.809	0.001	NM_001034484.1								FGF18	fibroblast growth factor 18	-4.157	0.002	NM_001076007.1
																		LOC100848266	transmembrane protein 200B	-2.481	0.007	XM_003585799.1		BLCAP	bladder cancer associated protein	-2.812	0.001	NM_174250.3								RPL32	ribosomal protein L32	-4.171	0.002	NM_001034783.1
																		TPD52L2	tumor protein D52-like 2	-2.481	0.007	NM_001034615.1		MYEOV2	myeloma overexpressed 2	-2.813	0.001	NM_001195051.1								EEF1A1	eukaryotic translation elongation factor 1 alpha 1	-4.176	0.002	NM_174535.1
																		MTMR12	myotubularin related protein 12	-2.482	0.007	XM_002696402.2		CHCHD2	coiled-coil-helix-coiled-coil-helix domain containing 2	-2.814	0.001	NM_001034746.1								LOC618297	high mobility group protein B2-like	-4.187	0.002	XM_002686665.1
																		TPI1	triosephosphate isomerase 1	-2.482	0.007	NM_001013589.2		GAPDH	glyceraldehyde-3-phosphate dehydrogenase	-2.814	0.001	NM_001034034.1								PPM1A	protein phosphatase, Mg2+/Mn2+ dependent, 1A	-4.191	0.002	NM_174429.2
																		LOC100847602	uncharacterized LOC100847602	-2.483	0.007	XR_139313.1		LOC787404	ribosomal protein S20-like	-2.815	0.001	XM_002697700.2								SLC16A7	solute carrier family 16, member 7 (monocarboxylic acid transporter 2)	-4.198	0.002	NM_001076336.2
																		TCN1	transcobalamin I (vitamin B12 binding protein, R binder family)	-2.483	0.007	NM_001193105.1		IL27RA	interleukin 27 receptor, alpha	-2.816	0.001	NM_001098028.1								RPS4X	ribosomal protein S4, X-linked	-4.2	0.002	NM_001035445.1
																		HSPE1	heat shock 10kDa protein 1 (chaperonin 10)	-2.484	0.007	NM_174346.2		MSN	moesin	-2.817	0.001	NM_001046477.1								LOC100848786	lipid phosphate phosphatase-related protein type 5-like	-4.22	0.002	XM_003585865.1
																		XIST	X (inactive)-specific transcript	-2.484	0.007	NR_001464.2		GNAS	GNAS complex locus	-2.819	0.001	NM_181021.3								LOC613595	L-lactate dehydrogenase B chain-like	-4.251	0.002	XM_003585668.1
																		CHD4	chromodomain helicase DNA binding protein 4	-2.49	0.007	NM_001206501.1		LOC100848359	elongation factor 1-alpha 1-like	-2.821	0.001	XM_003587615.1								LOC784243	ribosomal protein L34 pseudogene	-4.253	0.002	XR_139437.1
																		RPL39	ribosomal protein L39	-2.491	0.007	NM_001105455.1		GMFG	glia maturation factor, gamma	-2.822	0.001	NM_001024537.1								LOC781070	elongation factor 1-alpha 1-like	-4.258	0.002	XR_083751.1
																		LOC781339	heat shock protein 90kDa alpha (cytosolic), class A member 1 pseudogene	-2.497	0.007	XR_083814.1		SLC23A1	solute carrier family 23 (ascorbic acid transporter), member 1	-2.822	0.001	XM_002689263.2								RPL34	ribosomal protein L34	-4.259	0.002	NM_001206221.1
																		NDUFS5	NADH dehydrogenase (ubiquinone) Fe-S protein 5, 15kDa (NADH-coenzyme Q reductase)	-2.497	0.007	NM_176652.2		PPIA	peptidylprolyl isomerase A (cyclophilin A)	-2.826	0.003	NM_178320.2								LLPH	LLP homolog, long-term synaptic facilitation (Aplysia)	-4.278	0.002	NM_001038522.1
																		FTH1	ferritin, heavy polypeptide 1	-2.498	0.007	NM_174062.3		JAK3	Janus kinase 3	-2.828	0.001	XM_002688539.2								LOC508628	ribosomal protein S6 pseudogene	-4.278	0.002	NM_001015548.1
																		PLD1	phospholipase D1, phosphatidylcholine-specific	-2.5	0.007	NM_001102001.1		GLRX	glutaredoxin (thioltransferase)	-2.833	0.001	NM_001037604.1								PTMA	prothymosin, alpha (gene sequence 28)	-4.332	0.001	XM_003585780.1
																		RNF167	ring finger protein 167	-2.5	0.007	NM_001076405.2		LOC100848266	transmembrane protein 200B	-2.838	0.001	XM_003585799.1								PTMA	prothymosin, alpha (gene sequence 28)	-4.332	0.001	XM_003585781.1
																		DDX6	DEAD (Asp-Glu-Ala-Asp) box polypeptide 6	-2.501	0.007	NM_001143867.1		DAD1	defender against cell death 1	-2.839	0.001	NM_001034761.1								PTMA	prothymosin, alpha (gene sequence 28)	-4.332	0.007	XM_002685597.2
																		SRD5A3	steroid 5 alpha-reductase 3	-2.505	0.006	NM_001206090.1		ECM1	extracellular matrix protein 1	-2.841	0.001	NM_001099706.1								SSB	Sjogren syndrome antigen B (autoantigen La)	-4.337	0.001	NM_176665.2
																		RPL18A	ribosomal protein L18a	-2.506	0.006	NM_001033619.1		PKM2	pyruvate kinase, muscle	-2.849	0.001	NM_001205727.1								PNRC2	proline-rich nuclear receptor coactivator 2	-4.341	0.001	NM_001076957.1
																		LOC532189	carboxypeptidase D	-2.507	0.026	XM_003587391.1-1		RPS12	ribosomal protein S12	-2.849	0.001	NM_001014387.1								TMBIM4	transmembrane BAX inhibitor motif containing 4	-4.341	0.001	NM_001014914.2
																		GPSM3	G-protein signaling modulator 3	-2.509	0.006	XM_002697372.2		CORO1A	coronin, actin binding protein, 1A	-2.852	0.001	NM_174521.2								LOC782437	ribosomal protein L7 pseudogene	-4.369	0.001	XR_083791.1
																		RNASE6	ribonuclease, RNase A family, k6	-2.51	0.006	NM_174594.2		POMP	proteasome maturation protein	-2.854	0.001	NM_001034376.1								LOC789867	eukaryotic translation elongation factor 1 alpha 1 pseudogene	-4.377	0.001	XR_083807.1
																		CALCOCO1	calcium binding and coiled-coil domain 1	-2.511	0.006	NM_001046435.1		EPHX2	epoxide hydrolase 2, cytoplasmic	-2.855	0.001	NM_001075534.1								RPL4	ribosomal protein L4	-4.383	0.001	NM_001014894.1
																		FMNL1	formin-like 1	-2.512	0.006	XM_002696051.1		LASP1	LIM and SH3 protein 1	-2.855	0.001	NM_001035394.1								LOC100295976	uncharacterized LOC100295976	-4.387	0.001	XM_002687287.2
																		PLXNA2	plexin A2	-2.512	0.006	NM_001206657.1		LOC782021	ribosomal protein L21 pseudogene	-2.858	0.001	XR_084028.1								LOC782776	eukaryotic translation elongation factor 1 alpha 1 pseudogene	-4.394	0.001	XR_083578.2
																		SH3BGRL3	SH3 domain binding glutamic acid-rich protein like 3	-2.512	0.006	NM_001034763.1		RAB5B	RAB5B, member RAS oncogene family	-2.86	0.001	NM_001206191.1								RPL6	ribosomal protein L6	-4.431	0.001	NM_001031756.1
																		SELK	selenoprotein K	-2.514	0.006	NM_001037489.2		HNRNPA0	heterogeneous nuclear ribonucleoprotein A0	-2.862	0.001	XM_002689195.1								RAP1A	RAP1A, member of RAS oncogene family	-4.439	0.001	NM_174448.3
																		TSR2	TSR2, 20S rRNA accumulation, homolog (S. cerevisiae)	-2.514	0.006	NM_001035097.1		PRPF8	PRP8 pre-mRNA processing factor 8 homolog (S. cerevisiae)	-2.862	0.001	NM_001105638.1								LOC788541	ribosomal protein L7 pseudogene	-4.444	0.001	XR_083686.2
																		RPL7A	ribosomal protein L7a	-2.516	0.006	NM_001040520.1		NRBP1	nuclear receptor binding protein 1	-2.863	0.001	NM_001076889.1								RPS23	ribosomal protein S23	-4.45	0.001	NM_001034690.1
																		ERP29	endoplasmic reticulum protein 29	-2.521	0.006	NM_001076271.1		LOC785954	ribosomal protein S10 pseudogene	-2.865	0.001	XR_083660.1								LARP7	La ribonucleoprotein domain family, member 7	-4.463	0.001	NM_001075184.2
																		ABCF1	ATP-binding cassette, sub-family F (GCN20), member 1	-2.523	0.006	NM_001206909.1		PNRC2	proline-rich nuclear receptor coactivator 2	-2.866	0.001	NM_001076957.1								TMSB4	thymosin beta 4, X-linked	-4.463	0.001	NM_001113231.1
																		C7H19orf42	small integral membrane protein 7	-2.523	0.006	NM_001205376.2		PRELID1	PRELI domain containing 1	-2.866	0.001	NM_001038138.1								PABPC1	poly(A) binding protein, cytoplasmic 1	-4.472	0.001	NM_174568.2
																		CDC42BPB	CDC42 binding protein kinase beta (DMPK-like)	-2.524	0.006	XM_003587584.1		LOC524810	IgM	-2.873	0.001	NM_001205186.1								RPS6	ribosomal protein S6	-4.491	0.001	XM_003586371.1
																		ANXA11	annexin A11	-2.525	0.006	NM_174502.2		SQSTM1	sequestosome 1	-2.876	0.001	NM_176641.1								TUBA1B	tubulin, alpha 1b	-4.491	0.001	NM_001114856.1
																		LOC529646	histone cluster 1, H2bm	-2.528	0.006	XM_002697504.1		FKBP2	FK506 binding protein 2, 13kDa	-2.877	0.001	NM_001037481.1								ACSL3	acyl-CoA synthetase long-chain family member 3	-4.5	0.001	NM_001205468.1
																		ORMDL3	ORM1-like 3 (S. cerevisiae)	-2.53	0.006	NM_001076367.1		RPL6	ribosomal protein L6	-2.88	0.001	NM_001031756.1								LOC782038	protein phosphatase 1A-like	-4.513	0.001	XM_002686315.1
																		H2AFZ	H2A histone family, member Z	-2.531	0.006	NM_174809.2		RPL9	ribosomal protein L9	-2.88	0.001	NM_001024469.2								RPS25	ribosomal protein S25	-4.515	0.001	NM_001025315.1
																		LY6E	lymphocyte antigen 6 complex, locus E	-2.531	0.006	NM_001046070.1		FKBP2	FK506 binding protein 2, 13kDa	-2.885	0.001	NM_001113256.1								EEF1B2	eukaryotic translation elongation factor 1 beta 2	-4.517	0.001	NM_001014936.1
																		TLN1	talin 1	-2.534	0.006	NM_001205428.1		LOC504548	ubiquitin D-like	-2.891	0.001	XM_002697377.1								FAM101B	family with sequence similarity 101, member B	-4.528	0.001	XM_002695711.2
																		LOC781499	heterogeneous nuclear ribonucleoprotein A3 pseudogene	-2.536	0.006	XR_083648.2		TMSB4	thymosin beta 4, X-linked	-2.892	0.001	NM_001113231.1								TMSB4X	thymosin beta 4, X-linked	-4.542	0.001	NM_001002885.1
																		TG	thyroglobulin	-2.537	0.006	NM_173883.2-1		LOC100138864	eukaryotic translation initiation factor 4A2 pseudogene	-2.893	0.001	XR_083821.2								TMCC3	transmembrane and coiled-coil domain family 3	-4.553	0.001	NM_001038063.1
																		UBA1	ubiquitin-like modifier activating enzyme 1	-2.538	0.006	NM_001102477.1		IRF1	interferon regulatory factor 1	-2.897	0.001	NM_001191261.2								SLC23A1	solute carrier family 23 (ascorbic acid transporter), member 1	-4.615	0.001	XM_002689263.2
																		COX5B	cytochrome c oxidase subunit Vb	-2.546	0.005	NM_001034046.1		HNRNPD	heterogeneous nuclear ribonucleoprotein D (AU-rich element RNA binding protein 1, 37kDa)	-2.899	0.001	NM_001098064.1								LOC782954	elongation factor 1-alpha 1-like	-4.688	0	XR_084029.1
																		CEBPD	CCAAT/enhancer binding protein (C/EBP), delta	-2.553	0.005	NM_174267.2		LOC100847921	uncharacterized LOC100847921	-2.899	0.001	XR_139461.1								ARPC5	actin related protein 2/3 complex, subunit 5, 16kDa	-4.801	0	NM_001035447.1
																		RFXAP	regulatory factor X-associated protein	-2.557	0.005	XM_002691750.2		ZNF830	zinc finger protein 830	-2.899	0.001	NM_001082612.1								LOC783838	eukaryotic translation elongation factor 1 alpha 1 pseudogene	-4.812	0	XR_083736.2
																		NDFIP1	Nedd4 family interacting protein 1	-2.56	0.005	XM_002689268.2		ANP32A	acidic (leucine-rich) nuclear phosphoprotein 32 family, member A	-2.901	0.001	NM_001195019.1								STMN1	stathmin 1	-4.83	0	NM_001034790.1
																		PLA2G15	phospholipase A2, group XV	-2.561	0.005	NM_174560.2		ZYX	zyxin	-2.901	0.001	NM_001078101.1								RPL7	ribosomal protein L7	-4.84	0	NM_001014928.1
																		FAM162A	family with sequence similarity 162, member A	-2.563	0.005	NM_001046592.1		RPL12	ribosomal protein L12	-2.904	0.001	NM_205797.1								PCSK6	proprotein convertase subtilisin/kexin type 6	-4.857	0	XM_002696654.2
																		LOC614423	phosphoglycerate mutase 1 (brain) pseudogene	-2.563	0.005	XR_083813.1		CCNI	cyclin I	-2.91	0.001	NM_001083373.1								LDHB	lactate dehydrogenase B	-4.873	0	NM_174100.1
																		IFITM1	interferon induced transmembrane protein 1 (9-27)	-2.565	0.005	NM_001078142.1		GDI1	GDP dissociation inhibitor 1	-2.91	0.001	NM_174064.3								LOC618220	ribosomal protein L6 pseudogene	-4.884	0	XR_083644.2
																		TSPYL1	TSPY-like 1	-2.568	0.005	NM_001076111.1		ATP6V0C	ATPase, H+ transporting, lysosomal 16kDa, V0 subunit c	-2.92	0.001	NM_001017954.1								C9H6orf170	TBC1 domain family, member 32	-4.892	0	XM_002690075.1
																		SPIB	Spi-B transcription factor (Spi-1/PU.1 related)	-2.572	0.005	NM_001205444.1		KRCC1	lysine-rich coiled-coil 1	-2.92	0.001	NM_001075303.1								CCNG1	cyclin G1	-4.892	0	NM_001013364.1
																		LOC782609	nucleosome assembly protein 1-like 1-like	-2.575	0.005	XM_002707812.2		CD2	CD2 molecule	-2.925	0	NM_001011676.2								DNAI1	dynein, axonemal, intermediate chain 1	-4.892	0	NM_001038142.1
																		RAC1	ras-related C3 botulinum toxin substrate 1 (rho family, small GTP binding protein Rac1)	-2.579	0.005	NM_174163.2		HSPA5	heat shock 70kDa protein 5 (glucose-regulated protein, 78kDa)	-2.925	0	NM_001075148.1								DTD1	D-tyrosyl-tRNA deacylase 1 homolog (S. cerevisiae)	-4.892	0	NM_001038104.1
																		ATP6V1E1	ATPase, H+ transporting, lysosomal 31kDa, V1 subunit E1	-2.582	0.005	NM_174810.2		LY6E	lymphocyte antigen 6 complex, locus E	-2.928	0	NM_001046070.1								ITM2B	integral membrane protein 2B	-4.892	0	NM_001035093.1
																		ENY2	enhancer of yellow 2 homolog (Drosophila)	-2.585	0.005	NM_001034747.1		UQCRB	ubiquinol-cytochrome c reductase binding protein	-2.929	0	NM_001034797.1								LOC100299845	60S ribosomal protein L5-like	-4.892	0	XR_083789.2
																		VIM	vimentin	-2.586	0.005	NM_173969.3		RPL36A	ribosomal protein L36a-like	-2.933	0	NM_001034316.1								LOC100848359	elongation factor 1-alpha 1-like	-4.892	0	XM_003587615.1
																		LITAF	lipopolysaccharide-induced TNF factor	-2.588	0.005	NM_001046252.1		LOC782479	60S ribosomal protein L26-like	-2.938	0	XR_083794.1								LOC100848688	uncharacterized LOC100848688	-4.892	0	XR_139378.1
																		TMCC3	transmembrane and coiled-coil domain family 3	-2.589	0.004	NM_001038063.1		CITED2	Cbp/p300-interacting transactivator, with Glu/Asp-rich carboxy-terminal domain, 2	-2.942	0	NM_001075819.1								LOC781813	eukaryotic translation elongation factor 1 alpha 1 pseudogene	-4.892	0	XR_083620.2
																		C21H14orf2	chromosome 21 open reading frame, human C14orf2	-2.591	0.004	NM_001113315.1		LOC100336106	chromosome 19 open reading frame, human C17orf72	-2.942	0	XR_139617.1								NPM1	nucleophosmin (nucleolar phosphoprotein B23, numatrin)	-4.892	0	NM_001035441.1
																		RPS15A	ribosomal protein S15A	-2.591	0.002	NM_001037443.1		UBL5	ubiquitin-like 5	-2.942	0	NM_001037710.1								PF4	platelet factor 4	-4.892	0	NM_001101062.1
																		COX4I1	cytochrome c oxidase subunit IV isoform 1	-2.593	0.004	NM_001001439.2		ACTG1	actin, gamma 1	-2.945	0	NM_001033618.1								RPL5	ribosomal protein L5	-4.892	0	NM_001035306.1
																		RPL28	ribosomal protein L28	-2.597	0.004	NM_001035503.1		CDKN1B	cyclin-dependent kinase inhibitor 1B (p27, Kip1)	-2.947	0	NM_001100346.1								SERBP1	SERPINE1 mRNA binding protein 1	-4.892	0	NM_001046449.1
																		CCNI	cyclin I	-2.598	0.004	NM_001083373.1		RPS18	ribosomal protein S18	-2.947	0	NM_001033614.1								TCEAL4	transcription elongation factor A (SII)-like 4	-4.892	0	XM_002699844.2
																		HIST1H2AH	histone cluster 1, H2ah	-2.6	0.004	XM_002697498.2		GABARAP	GABA(A) receptor-associated protein	-2.948	0	NM_001034048.1								ZNF197	zinc finger protein 197	-4.892	0	NM_001206813.1
																		UBTF	upstream binding transcription factor, RNA polymerase I	-2.601	0.004	XM_003587451.1		SMARCD2	SWI/SNF related, matrix associated, actin dependent regulator of chromatin, subfamily d, member 2	-2.953	0	NM_001205462.1
																		UBTF	upstream binding transcription factor, RNA polymerase I	-2.601	0.004	XM_003587452.1		UTP14A	UTP14, U3 small nucleolar ribonucleoprotein, homolog A-like	-2.955	0.002	NM_001100302.1
																		DUSP6	dual specificity phosphatase 6	-2.605	0.004	NM_001046195.1		BHLHE40	basic helix-loop-helix family, member e40	-2.96	0	NM_001024929.1
																		PTPN6	protein tyrosine phosphatase, non-receptor type 6	-2.605	0.004	NM_001098017.1		LOC781576	mCG1723-like	-2.96	0.001	XM_003585884.1
																		RPL22	ribosomal protein L22	-2.608	0.004	XM_002694113.2		VPS25	vacuolar protein sorting 25 homolog (S. cerevisiae)	-2.961	0	NM_001015657.2
																		HSPB1	heat shock 27kDa protein 1	-2.612	0.004	NM_001025569.1		ENY2	enhancer of yellow 2 homolog (Drosophila)	-2.969	0	NM_001034747.1
																		UBTF	upstream binding transcription factor, RNA polymerase I	-2.614	0.004	XM_002696042.2		SLC9A3R1	solute carrier family 9 (sodium/hydrogen exchanger), member 3 regulator 1	-2.972	0	NM_001077852.1
																		SEPT-1	septin 1	-2.616	0.004	NM_001098947.1		TCTN1	tectonic family member 1	-2.976	0	NM_001046056.2
																		TKT	transketolase	-2.617	0.004	NM_001003906.1		SASH3	SAM and SH3 domain containing 3	-2.977	0	NM_001077998.1
																		LRRFIP1	leucine rich repeat (in FLII) interacting protein 1	-2.62	0.004	NM_001102308.1		LGMN	legumain	-2.982	0	NM_174101.2
																		PSMB4	proteasome (prosome, macropain) subunit, beta type, 4	-2.62	0.004	NM_001034266.1		RPL35	ribosomal protein L35	-2.984	0	NM_001034495.1
																		PSMB8	proteasome (prosome, macropain) subunit, beta type, 8 (large multifunctional peptidase 7)	-2.62	0.004	NM_001040480.1		SEPT-1	septin 1	-2.984	0	NM_001098947.1
																		UBXN1	UBX domain protein 1	-2.621	0.004	NM_001037588.1		LOC785386	ribosomal protein L10-like	-2.985	0	XM_002687966.1
																		LCP1	lymphocyte cytosolic protein 1 (L-plastin)	-2.622	0.004	NM_001034720.1		PTPN6	protein tyrosine phosphatase, non-receptor type 6	-2.985	0	NM_001098017.1
																		ABHD14B	abhydrolase domain containing 14B	-2.626	0.004	NM_001105441.1		SPIB	Spi-B transcription factor (Spi-1/PU.1 related)	-2.986	0	NM_001205444.1
																		LOC788801	ferritin-1, chloroplastic-like	-2.631	0.004	XM_003587735.1		EIF3CL	eukaryotic translation initiation factor 3, subunit C-like	-2.987	0	NM_001034618.1
																		ICAM3	intercellular adhesion molecule 3	-2.632	0.004	NM_174349.1		TAGLN2	transgelin 2	-2.991	0	NM_001013599.1
																		C7H19orf43	chromosome 7 open reading frame, human C19orf43	-2.634	0.004	NM_001083371.1		PSMB4	proteasome (prosome, macropain) subunit, beta type, 4	-2.994	0	NM_001034266.1
																		SLA2	Src-like-adaptor 2	-2.635	0.004	NM_001035294.1		YWHAB	tyrosine 3-monooxygenase/tryptophan 5-monooxygenase activation protein, beta polypeptide	-2.995	0	NM_174794.2
																		LOC515042	SCAN domain containing 1-like	-2.637	0.004	NM_001105370.2		MRFAP1	Morf4 family associated protein 1	-2.997	0	NM_001035344.1
																		TMBIM6	transmembrane BAX inhibitor motif containing 6	-2.637	0.004	NM_001076414.1		LCP1	lymphocyte cytosolic protein 1 (L-plastin)	-3.009	0	NM_001034720.1
																		EXOSC10	exosome component 10	-2.638	0.004	NM_001102186.1		LOC781813	eukaryotic translation elongation factor 1 alpha 1 pseudogene	-3.018	0	XR_083620.2
																		GLIPR2	GLI pathogenesis-related 2	-2.641	0.004	NM_001076112.1		RPS3A	ribosomal protein S3A	-3.022	0	NM_001034038.1
																		DDX24	DEAD (Asp-Glu-Ala-Asp) box polypeptide 24	-2.648	0.004	NM_001099045.1		CD99	CD99 molecule	-3.023	0	NM_001244214.1
																		LOC786726	heterogeneous nuclear ribonucleoprotein K pseudogene	-2.649	0.004	XR_083865.1		LOC788696	RAN, member RAS oncogene family pseudogene	-3.025	0	XR_083779.2
																		TUBB2B	tubulin, beta class I	-2.65	0.003	NM_001046549.1		RNF113A	ring finger protein 113A	-3.028	0	NM_001007807.1
																		IL27RA	interleukin 27 receptor, alpha	-2.652	0.003	NM_001098028.1		ATP5B	ATP synthase, H+ transporting, mitochondrial F1 complex, beta polypeptide	-3.029	0	NM_175796.2
																		TBC1D25	TBC1 domain family, member 25	-2.652	0.003	NM_001205813.1		DUSP1	dual specificity phosphatase 1	-3.029	0	NM_001046452.1
																		HIST2H2AC	histone cluster 2, H2ac	-2.653	0.003	NM_001081720.1		BRD2	bromodomain containing 2	-3.032	0	NM_001045866.1
																		PAH	phenylalanine hydroxylase	-2.654	0.003	NM_001046058.1		LOC505941	ribosome binding protein 1	-3.032	0	XM_003586781.1
																		SQSTM1	sequestosome 1	-2.655	0.003	NM_176641.1		SUB1	SUB1 homolog (S. cerevisiae)	-3.032	0	NM_001105407.1
																		SURF1	surfeit 1	-2.655	0.003	XM_002691662.1		APOBR	apolipoprotein B receptor	-3.033	0	XM_002698084.2
																		LOC100297647	translationally-controlled tumor protein-like	-2.657	0.003	XM_002690912.2		SSR2	signal sequence receptor, beta (translocon-associated protein beta)	-3.041	0	NM_001015533.1
																		GADD45A	growth arrest and DNA-damage-inducible, alpha	-2.658	0.003	NM_001034247.1		WDR55	WD repeat domain 55	-3.041	0	NM_001014873.1
																		CRISPLD2	cysteine-rich secretory protein LCCL domain containing 2	-2.659	0.003	NM_001100299.1		NDFIP1	Nedd4 family interacting protein 1	-3.043	0	XM_002689268.2
																		SSRP1	structure specific recognition protein 1	-2.659	0.003	NM_001101041.1		LOC790088	40S ribosomal protein S28-like	-3.044	0	XR_084093.2
																		POLE4	polymerase (DNA-directed), epsilon 4 (p12 subunit)	-2.66	0.003	NM_001101225.1		ZNF197	zinc finger protein 197	-3.046	0	NM_001206813.1
																		LOC783612	glyceraldehyde-3-phosphate dehydrogenase pseudogene	-2.661	0.003	XR_083602.1		UBC	ubiquitin C	-3.051	0	NM_001206307.1
																		SF3A1	splicing factor 3a, subunit 1, 120kDa	-2.662	0.003	NM_001081510.1		RPS10	ribosomal protein S10	-3.054	0	NM_001034716.1
																		PDAP1	PDGFA associated protein 1	-2.67	0.003	XM_002698216.2		C2H1orf38	thymocyte selection associated family member 2	-3.055	0	XM_002685688.2
																		EEF1D	eukaryotic translation elongation factor 1 delta (guanine nucleotide exchange protein)	-2.675	0.003	NM_001206620.1		LOC100337215	peptidylprolyl isomerase A (cyclophilin A)-like	-3.056	0	XM_002690515.2
																		CNN2	calponin 2	-2.677	0.003	NM_001035420.1		TUBA1A	tubulin, alpha 1a	-3.065	0	NM_001166505.1
																		PBXIP1	pre-B-cell leukemia homeobox interacting protein 1	-2.682	0.003	NM_001075265.1		LRRFIP1	leucine rich repeat (in FLII) interacting protein 1	-3.066	0	NM_001102308.1
																		LOC100848353	heterogeneous nuclear ribonucleoprotein A1-like	-2.683	0.003	XM_003585859.1		RPL27	ribosomal protein L27	-3.066	0	NM_001034051.1
																		IRF2BP2	interferon regulatory factor 2 binding protein 2	-2.688	0.003	XM_002698810.1		APEX1	APEX nuclease (multifunctional DNA repair enzyme) 1	-3.07	0	NM_176609.3
																		BRD2	bromodomain containing 2	-2.689	0.003	NM_001045866.1		C9H6orf170	TBC1 domain family, member 32	-3.07	0	XM_002690075.1
																		LOC100294894	uncharacterized LOC100294894	-2.689	0.003	XM_002685990.1		PNRC1	proline-rich nuclear receptor coactivator 1	-3.07	0	NM_001034308.1
																		SPIN1	spindlin 1	-2.693	0.003	NM_001192821.1		NOP56	NOP56 ribonucleoprotein homolog (yeast)	-3.071	0	NM_001033622.1
																		LOC511683	asparaginyl-tRNA synthetase pseudogene	-2.694	0.003	XR_083912.1		ALDOA	aldolase A, fructose-bisphosphate	-3.075	0	NM_001101915.1
																		VPS33A	vacuolar protein sorting 33 homolog A (S. cerevisiae)	-2.695	0.003	NM_001046049.1		RPS11	ribosomal protein S11	-3.075	0	NM_001024568.1
																		LOC784445	60S ribosomal protein L17-like	-2.699	0.003	XM_002691258.2		TUBB4B	tubulin, beta 2C	-3.079	0	NM_001034663.1
																		SSR4	signal sequence receptor, delta	-2.7	0.003	NM_001038503.1		GNB2L1	guanine nucleotide binding protein (G protein), beta polypeptide 2-like 1	-3.081	0	NM_175802.2
																		ZFP36L2	zinc finger protein 36, C3H type-like 2	-2.7	0.003	NM_001191191.1		PSMB8	proteasome (prosome, macropain) subunit, beta type, 8 (large multifunctional peptidase 7)	-3.085	0	NM_001040480.1
																		NHSL2	NHS-like 2	-2.703	0.003	XM_002700012.1		LOC100847811	60S ribosomal protein L24-like	-3.098	0	XR_139700.1
																		LOC100847459	uncharacterized LOC100847459	-2.705	0.003	XM_003586189.1		LOC100296593	uncharacterized LOC100296593	-3.1	0	XR_139608.1
																		PFDN5	prefoldin subunit 5	-2.705	0.003	NM_174732.2		UBB	ubiquitin B	-3.1	0	NM_174133.2
																		SPN	sialophorin	-2.706	0.003	NM_001103102.1		SAP18	Sin3A-associated protein, 18kDa	-3.101	0	NM_001035467.2
																		CAPNS1	calpain, small subunit 1	-2.708	0.003	NM_174261.1		SELK	selenoprotein K	-3.101	0	NM_001037489.2
																		RPL23A	ribosomal protein L23a	-2.708	0.003	NM_001045958.1		RPL10	ribosomal protein L10	-3.102	0	NM_174760.2
																		MCL1	myeloid cell leukemia sequence 1 (BCL2-related)	-2.71	0.003	NM_001099206.1		LOC100847202	uncharacterized LOC100847202	-3.109	0	XR_139370.1
																		C16H1orf105	chromosome 16 open reading frame, human C1orf105	-2.711	0.003	NM_001205494.1		SLC44A2	solute carrier family 44, member 2	-3.113	0	NM_001098139.1
																		NRBP1	nuclear receptor binding protein 1	-2.711	0.003	NM_001076889.1		TLE3	transducin-like enhancer of split 3 (E(sp1) homolog, Drosophila)	-3.113	0	NM_001193206.1
																		PPIA	peptidylprolyl isomerase A (cyclophilin A)	-2.713	0.008	NM_178320.2		HMGN2	high mobility group nucleosomal binding domain 2	-3.116	0	NM_001098945.1
																		S100A8	S100 calcium binding protein A8	-2.714	0.003	NM_001113725.1		KLF6	Kruppel-like factor 6	-3.119	0	NM_001035271.2
																		PIM3	pim-3 oncogene	-2.717	0.003	XM_002688010.2		SPOCK2	sparc/osteonectin, cwcv and kazal-like domains proteoglycan (testican) 2	-3.123	0	NM_001101115.1
																		NDUFS2	NADH dehydrogenase (ubiquinone) Fe-S protein 2, 49kDa (NADH-coenzyme Q reductase)	-2.719	0.003	NM_001075137.1		H2AFZ	H2A histone family, member Z	-3.128	0	NM_174809.2
																		H3F3B	H3 histone, family 3B	-2.72	0.003	NM_001242571.1		SF3B2	splicing factor 3b, subunit 2, 145kDa	-3.129	0	NM_001103271.1
																		RPS3	ribosomal protein S3	-2.723	0.003	NM_001034047.1		SPN	sialophorin	-3.129	0	NM_001103102.1
																		VASP	vasodilator-stimulated phosphoprotein	-2.723	0.003	NM_001038110.1		GPSM3	G-protein signaling modulator 3	-3.133	0	XM_002697372.2
																		C25H16orf73	meiosis specific with OB domains	-2.729	0.002	XM_002697856.1		LOC100848296	uncharacterized LOC100848296	-3.134	0	XR_139389.1
																		CD68	CD68 molecule	-2.729	0.002	NM_001045902.1		ZFP36L2	zinc finger protein 36, C3H type-like 2	-3.136	0	NM_001191191.1
																		DBNL	drebrin-like	-2.729	0.002	NM_001098970.1		FAM101B	family with sequence similarity 101, member B	-3.146	0	XM_002695711.2
																		EIF4A1	eukaryotic translation initiation factor 4A1	-2.733	0.002	NM_001034228.1		SSB	Sjogren syndrome antigen B (autoantigen La)	-3.148	0	NM_176665.2
																		CNPPD1	cyclin Pas1/PHO80 domain containing 1	-2.734	0.002	NM_001015538.1		LOC100138493	uncharacterized LOC100138493	-3.151	0	XR_139540.1
																		ACTB	actin, beta	-2.736	0.002	NM_173979.3		MCL1	myeloid cell leukemia sequence 1 (BCL2-related)	-3.151	0	NM_001099206.1
																		RPL30	ribosomal protein L30	-2.737	0.002	NM_001034434.1		IER2	immediate early response 2	-3.157	0	NM_001075871.1
																		GLG1	golgi glycoprotein 1	-2.74	0.002	NM_001244140.1		LOC784243	ribosomal protein L34 pseudogene	-3.158	0	XR_139437.1
																		CARD6	caspase recruitment domain family, member 6	-2.741	0.002	NM_001192521.1		SYF2	SYF2 homolog, RNA splicing factor (S. cerevisiae)	-3.159	0	XM_002685769.2
																		LOC530077	GTPase IMAP family member 5-like	-2.743	0.002	XM_002687042.1		ACTR2	ARP2 actin-related protein 2 homolog (yeast)	-3.163	0	NM_001102213.1
																		LOC530077	GTPase IMAP family member 5-like	-2.743	0.002	XM_002687043.1		RPS16	ribosomal protein S16	-3.163	0	NM_001033624.1
																		FLNA	filamin A, alpha	-2.744	0.002	NM_001206514.1		GABARAPL2	GABA(A) receptor-associated protein-like 2	-3.164	0	NM_174675.2
																		C7H19orf59	chromosome 7 open reading frame, human C19orf59	-2.745	0.002	XM_002688834.2		LOC100848913	uncharacterized LOC100848913	-3.164	0	XR_139376.1
																		CDC42SE1	CDC42 small effector 1	-2.747	0.002	NM_001035112.1		RARA	retinoic acid receptor, alpha	-3.165	0	NM_001014942.2
																		RPS15A	ribosomal protein S15A	-2.747	0.004	XM_002694842.2		LOC784572	suppressor of Ty 20 homolog (S. cerevisiae)	-3.169	0	XM_002700336.1
																		RPL24	ribosomal protein L24	-2.748	0.002	NM_174455.2		EMP3	epithelial membrane protein 3	-3.171	0	NM_001024562.1
																		ITPRIP	inositol 1,4,5-trisphosphate receptor interacting protein	-2.749	0.002	NM_001101178.1		NEDD8	neural precursor cell expressed, developmentally down-regulated 8	-3.175	0	NM_174764.3
																		NENF	neudesin neurotrophic factor	-2.753	0.002	NM_001076419.1		LOC508628	ribosomal protein S6 pseudogene	-3.179	0	NM_001015548.1
																		HIST1H1E	histone cluster 1, H1e	-2.754	0.002	XM_002697518.1		LOC783185	microtubule-associated protein 1 light chain 3 beta pseudogene	-3.195	0	XR_084030.1
																		UTP14A	UTP14, U3 small nucleolar ribonucleoprotein, homolog A-like	-2.758	0.001	NM_001100302.1		PIGC	phosphatidylinositol glycan anchor biosynthesis, class C	-3.196	0	NM_001034383.1
																		CCR1	chemokine (C-C motif) receptor 1	-2.762	0.002	NM_001077839.1		HIST2H2BE	histone cluster 2, H2be	-3.199	0	NM_001099384.1
																		LOC100847762	uncharacterized LOC100847762	-2.765	0.002	XR_139678.1		LDB1	LIM domain binding 1	-3.2	0	XM_002698449.2
																		SEPW1	selenoprotein W, 1	-2.767	0.002	NM_001163225.1		RPL8	ribosomal protein L8	-3.204	0	NM_001034625.1
																		LOC100296593	uncharacterized LOC100296593	-2.768	0.002	XR_139608.1		RPS17	ribosomal protein S17	-3.207	0	NM_001099210.1
																		UBB	ubiquitin B	-2.768	0.002	NM_174133.2		ORMDL3	ORM1-like 3 (S. cerevisiae)	-3.213	0	NM_001076367.1
																		GRTP1	growth hormone regulated TBC protein 1	-2.769	0.002	NM_001103336.1		SELL	selectin L	-3.216	0	NM_174182.1
																		TLE3	transducin-like enhancer of split 3 (E(sp1) homolog, Drosophila)	-2.769	0.002	NM_001193206.1		OAZ1	ornithine decarboxylase antizyme 1	-3.217	0	NM_001127243.1
																		PRR13	proline rich 13	-2.77	0.002	NM_001038047.1		PSMA7	proteasome (prosome, macropain) subunit, alpha type, 7	-3.227	0	NM_001034233.1
																		DAXX	death-domain associated protein	-2.771	0.002	NM_001075155.1		GABARAPL1	GABA(A) receptor-associated protein like 1	-3.239	0	NM_001033616.1
																		HSP90AA1	heat shock protein 90kDa alpha (cytosolic), class A member 1	-2.773	0.002	NM_001012670.2		NFIL3	nuclear factor, interleukin 3 regulated	-3.253	0	NM_001075240.1
																		H3F3A	H3 histone, family 3A	-2.776	0.002	NM_001014389.2		UBD	ubiquitin D	-3.255	0	NM_001206473.1
																		PPP1R10	protein phosphatase 1, regulatory subunit 10	-2.776	0.002	NM_001143863.1		LOC100849002	uncharacterized LOC100849002	-3.265	0	XM_003586114.1
																		GABARAPL2	GABA(A) receptor-associated protein-like 2	-2.777	0.002	NM_174675.2		RPS20	ribosomal protein S20	-3.281	0	NM_001034438.1
																		S100A11	S100 calcium binding protein A11	-2.779	0.002	NM_001098856.1		TUBB2B	tubulin, beta class I	-3.283	0	NM_001046549.1
																		FNDC7	fibronectin type III domain containing 7	-2.78	0.002	XM_002686193.1		LOC788541	ribosomal protein L7 pseudogene	-3.289	0	XR_083686.2
																		NDUFA13	NADH dehydrogenase (ubiquinone) 1 alpha subcomplex, 13	-2.78	0.002	NM_176672.2		RPL5	ribosomal protein L5	-3.304	0	NM_001035306.1
																		TPT1	tumor protein, translationally-controlled 1	-2.78	0.002	NM_001014388.1		CDKN2D	cyclin-dependent kinase inhibitor 2D (p19, inhibits CDK4)	-3.317	0	NM_001046050.1
																		LOC100299201	ribosomal protein L23a pseudogene	-2.781	0.002	XR_084007.2		CLIC1	chloride intracellular channel 1	-3.318	0	NM_001015608.1
																		LRRC16A	leucine rich repeat containing 16A	-2.782	0.002	NM_001192903.1		LMO2	LIM domain only 2 (rhombotin-like 1)	-3.319	0	NM_001076352.1
																		CFDP1	craniofacial development protein 1	-2.783	0.002	NM_174268.1		RPLP0	ribosomal protein, large, P0	-3.321	0	NM_001012682.1
																		MSN	moesin	-2.785	0.002	NM_001046477.1		TMEM50A	transmembrane protein 50A	-3.321	0	NM_001075163.1
																		DPYSL2	dihydropyrimidinase-like 2	-2.788	0.002	NM_001076000.1		DAGLB	diacylglycerol lipase, beta	-3.327	0	NM_001083487.1
																		CORO2A	coronin, actin binding protein, 2A	-2.789	0.002	NM_001038220.1		HSPE1	heat shock 10kDa protein 1 (chaperonin 10)	-3.327	0	NM_174346.2
																		TSPAN17	tetraspanin 17	-2.789	0.002	NM_001014880.2		TMSB4X	thymosin beta 4, X-linked	-3.333	0	NM_001002885.1
																		LOC788405	ribosomal protein L12 pseudogene	-2.79	0.002	XR_139580.1		NPM1	nucleophosmin (nucleolar phosphoprotein B23, numatrin)	-3.334	0	NM_001035441.1
																		RNASEH2C	ribonuclease H2, subunit C	-2.791	0.002	NM_001045921.1		POLD1	polymerase (DNA directed), delta 1, catalytic subunit	-3.337	0	NM_174427.2
																		TMSB10	thymosin beta 10	-2.794	0.002	NM_174623.2		NFE2	nuclear factor (erythroid-derived 2), 45kDa	-3.341	0	NM_001014923.1
																		IER2	immediate early response 2	-2.795	0.002	NM_001075871.1		ATXN7L3B	ataxin 7-like 3B	-3.343	0	NM_001078161.2
																		GLRX	glutaredoxin (thioltransferase)	-2.799	0.002	NM_001037604.1		KARS	lysyl-tRNA synthetase	-3.346	0	NM_001034356.1
																		SUB1	SUB1 homolog (S. cerevisiae)	-2.8	0.002	NM_001105407.1		RPL37A	ribosomal protein L37a	-3.348	0	NM_001035008.1
																		MYO1F	myosin IF	-2.804	0.002	NM_001192748.1		RPS6	ribosomal protein S6	-3.348	0	XM_003586371.1
																		RAB5B	RAB5B, member RAS oncogene family	-2.805	0.002	NM_001206191.1		GIMAP7	GTPase, IMAP family member 7	-3.369	0	NM_001046308.1
																		SLC9A3R1	solute carrier family 9 (sodium/hydrogen exchanger), member 3 regulator 1	-2.806	0.002	NM_001077852.1		NHP2L1	NHP2 non-histone chromosome protein 2-like 1 (S. cerevisiae)	-3.37	0	NM_001077004.1
																		LOC508666	C-C motif chemokine 23	-2.807	0.002	NM_001244199.1		NFKBIA	nuclear factor of kappa light polypeptide gene enhancer in B-cells inhibitor, alpha	-3.373	0	NM_001045868.1
																		TUBA4A	tubulin, alpha 4a	-2.809	0.002	NM_001078158.1		RPL11	ribosomal protein L11	-3.376	0	NM_001075581.1
																		SPOCK2	sparc/osteonectin, cwcv and kazal-like domains proteoglycan (testican) 2	-2.81	0.002	NM_001101115.1		S1PR1	sphingosine-1-phosphate receptor 1	-3.381	0	NM_001013585.3
																		CD99	CD99 molecule	-2.812	0.002	NM_001244214.1		BTG2	BTG family, member 2	-3.383	0	XM_002693879.1
																		LOC616200	glyceraldehyde-3-phosphate dehydrogenase-like	-2.813	0.002	XM_002684914.2		TCEAL4	transcription elongation factor A (SII)-like 4	-3.388	0	XM_002699844.2
																		RSL1D1	ribosomal L1 domain containing 1	-2.814	0.002	NM_001014876.1		RPL13A	ribosomal protein L13a	-3.394	0	NM_001076998.1
																		LOC100847890	uncharacterized LOC100847890	-2.815	0.002	XR_139676.1		SUPT6H	suppressor of Ty 6 homolog (S. cerevisiae)	-3.396	0	NM_001193126.1
																		PARK7	parkinson protein 7	-2.816	0.002	NM_001015572.1		RPL7	ribosomal protein L7	-3.397	0	NM_001014928.1
																		RPL15	ribosomal protein L15	-2.821	0.002	NM_001077866.1		LOC781381	nascent polypeptide-associated complex alpha subunit pseudogene	-3.398	0	XR_083742.2
																		LOC100847890	uncharacterized LOC100847890	-2.823	0.002	XR_139677.1		LOC100296205	ribosomal protein L36 pseudogene	-3.412	0	XR_083670.2
																		ITM2B	integral membrane protein 2B	-2.826	0.002	NM_001035093.1		LLPH	LLP homolog, long-term synaptic facilitation (Aplysia)	-3.413	0	NM_001038522.1
																		LOC616840	ribosomal protein L3 pseudogene	-2.827	0.002	XR_083586.1		IK	IK cytokine, down-regulator of HLA II	-3.419	0	NM_001103349.1
																		NCL	nucleolin	-2.829	0.002	NM_001206660.1		TOB2	transducer of ERBB2, 2	-3.427	0	NM_001083387.1
																		LOC100847202	uncharacterized LOC100847202	-2.83	0.002	XR_139370.1		EEF2	eukaryotic translation elongation factor 2	-3.428	0	NM_001075121.1
																		ATP5H	ATP synthase, H+ transporting, mitochondrial Fo complex, subunit d	-2.831	0.002	NM_174724.3		PSME1	proteasome (prosome, macropain) activator subunit 1 (PA28 alpha)	-3.429	0	NM_001024509.2
																		PAPPA	pregnancy-associated plasma protein A, pappalysin 1	-2.833	0.002	XM_002689953.2		TUBA1B	tubulin, alpha 1b	-3.437	0	NM_001114856.1
																		CALR	calreticulin	-2.839	0.002	NM_174000.2		RPL37	ribosomal protein L37	-3.441	0	NM_001078132.1
																		C14H8orf45	minichromosome maintenance domain containing 2	-2.84	0.002	XM_002692690.2		ARF3	ADP-ribosylation factor 3	-3.444	0	NM_001015571.2
																		LOC100337074	Leukocyte elastase inhibitor-like	-2.842	0.002	XM_002697631.1		RSL1D1	ribosomal L1 domain containing 1	-3.454	0	NM_001014876.1
																		NFIL3	nuclear factor, interleukin 3 regulated	-2.846	0.002	NM_001075240.1		LOC100295976	uncharacterized LOC100295976	-3.465	0	XM_002687287.2
																		LOC787803	ribosomal protein S23-like	-2.849	0.002	XM_002700116.2		H3F3B	H3 histone, family 3B	-3.467	0	NM_001242571.1
																		LOC784521	ribosomal protein S6-like	-2.855	0.001	XR_139420.1		ACSL3	acyl-CoA synthetase long-chain family member 3	-3.468	0	NM_001205468.1
																		EIF5A	eukaryotic translation initiation factor 5A	-2.858	0.001	NM_001003658.2		LOC100849002	uncharacterized LOC100849002	-3.5	0	XM_003586113.1
																		LOC512248	DnaJ (Hsp40) homolog, subfamily C, member 8 pseudogene	-2.858	0.001	XR_083977.1		RPL27A	ribosomal protein L27a	-3.512	0	NM_001024471.1
																		RAB8A	RAB8A, member RAS oncogene family	-2.859	0.001	NM_001105481.1		RPL21	ribosomal protein L21	-3.514	0	NM_001191412.1
																		RPS14	ribosomal protein S14	-2.859	0.001	NM_001077830.1		TIFA	TRAF-interacting protein with forkhead-associated domain	-3.514	0	NM_001081621.1
																		LOC524810	IgM	-2.862	0.001	NM_001205186.1		SUN2	Sad1 and UNC84 domain containing 2	-3.516	0	NM_001102319.1
																		NDRG1	N-myc downstream regulated 1	-2.862	0.001	NM_001035009.1		OST4	oligosaccharyltransferase 4 homolog (S. cerevisiae)	-3.518	0	XM_002691457.1
																		HIST2H2BE	histone cluster 2, H2be	-2.863	0.001	NM_001099384.1		RPS24	ribosomal protein S24	-3.522	0	NM_001025339.1
																		IFITM2	interferon induced transmembrane protein 2 (1-8D)	-2.864	0.001	NM_001078054.1		COX6C	cytochrome c oxidase subunit VIc	-3.524	0	XM_002690379.1
																		LOC100138864	eukaryotic translation initiation factor 4A2 pseudogene	-2.866	0.001	XR_083821.2		BTG1	B-cell translocation gene 1, anti-proliferative	-3.532	0	NM_173999.2
																		DUSP1	dual specificity phosphatase 1	-2.869	0.001	NM_001046452.1		RPS23	ribosomal protein S23	-3.532	0	NM_001034690.1
																		CNBP	CCHC-type zinc finger, nucleic acid binding protein	-2.87	0.001	NM_001034224.1		LOC100848688	uncharacterized LOC100848688	-3.534	0	XR_139378.1
																		RPL18	ribosomal protein L18	-2.87	0.001	NM_001015556.2		DTD1	D-tyrosyl-tRNA deacylase 1 homolog (S. cerevisiae)	-3.538	0	NM_001038104.1
																		GABARAPL1	GABA(A) receptor-associated protein like 1	-2.873	0.001	NM_001033616.1		LOC100847762	uncharacterized LOC100847762	-3.54	0	XR_139678.1
																		TGFBI	transforming growth factor, beta-induced, 68kDa	-2.873	0.001	NM_001205402.1		LOC613595	L-lactate dehydrogenase B chain-like	-3.547	0	XM_003585668.1
																		LOC784354	ribosomal protein L12 pseudogene	-2.875	0.001	XR_083996.1		MYH9	myosin, heavy chain 9, non-muscle	-3.558	0	NM_001192762.1
																		YWHAB	tyrosine 3-monooxygenase/tryptophan 5-monooxygenase activation protein, beta polypeptide	-2.877	0.001	NM_174794.2		RPS8	ribosomal protein S8	-3.572	0	NM_001025317.1
																		SLC23A1	solute carrier family 23 (ascorbic acid transporter), member 1	-2.881	0.001	XM_002689263.2		PEBP1	phosphatidylethanolamine binding protein 1	-3.576	0	NM_001033623.1
																		S100A10	S100 calcium binding protein A10	-2.886	0.001	NM_174650.1		ZFP36L1	zinc finger protein 36, C3H type-like 1	-3.578	0	NM_001101234.1
																		ARF3	ADP-ribosylation factor 3	-2.894	0.001	NM_001015571.2		LOC100847354	uncharacterized LOC100847354	-3.598	0	XM_003587372.1
																		ZYX	zyxin	-2.899	0.001	NM_001078101.1		LOC530077	GTPase IMAP family member 5-like	-3.599	0	XM_002687042.1
																		ILK	integrin-linked kinase	-2.901	0.001	NM_001034693.1		LOC530077	GTPase IMAP family member 5-like	-3.599	0	XM_002687043.1
																		LOC783577	heat shock protein 90kDa alpha (cytosolic), class B member 1 pseudogene	-2.902	0.001	XR_084151.2		RPL36	ribosomal protein L36	-3.6	0	NM_001078139.1
																		PFN1	profilin 1	-2.902	0.001	NM_001015592.1		CMTM6	CKLF-like MARVEL transmembrane domain containing 6	-3.601	0	NM_001035066.1
																		CD37	CD37 molecule	-2.905	0.001	NM_001046011.1		CARD6	caspase recruitment domain family, member 6	-3.614	0	NM_001192521.1
																		CDKN2D	cyclin-dependent kinase inhibitor 2D (p19, inhibits CDK4)	-2.909	0.001	NM_001046050.1		LOC613519	ribosomal protein L3 pseudogene	-3.616	0	XR_083776.2
																		FCER1G	Fc fragment of IgE, high affinity I, receptor for; gamma polypeptide	-2.91	0.001	NM_174537.2		SERBP1	SERPINE1 mRNA binding protein 1	-3.62	0	NM_001046449.1
																		ARPC5L	actin related protein 2/3 complex, subunit 5-like	-2.911	0.001	NM_001034737.1		RPL3	ribosomal protein L3	-3.621	0	NM_174715.1
																		ZFP36L1	zinc finger protein 36, C3H type-like 1	-2.916	0.001	NM_001101234.1		RPL19	ribosomal protein L19	-3.623	0	XM_002695953.1
																		CALM	calmodulin-like	-2.917	0.001	NM_001166508.1		HNRNPUL1	heterogeneous nuclear ribonucleoprotein U-like 1	-3.637	0	NM_001083466.1
																		LOC100848513	60S ribosomal protein L10-like	-2.919	0.001	XM_003586150.1		H3F3A	H3 histone, family 3A	-3.651	0	NM_001014389.2
																		LOC782470	tropomyosin 1 (alpha) pseudogene	-2.919	0.001	XR_083734.2		RPS28	ribosomal protein S28	-3.666	0	NM_001025316.1
																		NONO	non-POU domain containing, octamer-binding	-2.923	0.001	NM_001046554.1		RPL36AL	ribosomal protein L36a-like	-3.669	0	NM_001079508.1
																		PRDX2	peroxiredoxin 2	-2.924	0.001	NM_174763.2		ARPC5	actin related protein 2/3 complex, subunit 5, 16kDa	-3.671	0	NM_001035447.1
																		ALDOA	aldolase A, fructose-bisphosphate	-2.927	0.001	NM_001101915.1		LOC782437	ribosomal protein L7 pseudogene	-3.676	0	XR_083791.1
																		UTP14A	UTP14, U3 small nucleolar ribonucleoprotein, homolog A-like	-2.928	0.002	NM_001034241.1		RPL31	ribosomal protein L31	-3.689	0	NM_001025341.2
																		SQRDL	sulfide quinone reductase-like (yeast)	-2.933	0.001	NM_001040511.2		RPL19	ribosomal protein L19	-3.723	0	NM_001040516.1
																		EFHD2	EF-hand domain family, member D2	-2.936	0.001	NM_001103245.1		ARL6IP1	ADP-ribosylation factor-like 6 interacting protein 1	-3.731	0	NM_001078157.1
																		IK	IK cytokine, down-regulator of HLA II	-2.936	0.001	NM_001103349.1		PTPN18	protein tyrosine phosphatase, non-receptor type 18 (brain-derived)	-3.74	0	NM_001078069.1
																		HDAC1	histone deacetylase 1	-2.939	0.001	NM_001037444.1		RPS4X	ribosomal protein S4, X-linked	-3.744	0	NM_001035445.1
																		PSMA7	proteasome (prosome, macropain) subunit, alpha type, 7	-2.945	0.001	NM_001034233.1		PRKAR2A	protein kinase, cAMP-dependent, regulatory, type II, alpha	-3.76	0	NM_001191367.1
																		PIGC	phosphatidylinositol glycan anchor biosynthesis, class C	-2.947	0.001	NM_001034383.1		SLC2A3	solute carrier family 2 (facilitated glucose transporter), member 3	-3.76	0	NM_174603.3
																		PKM2	pyruvate kinase, muscle	-2.948	0.001	NM_001205727.1		HNRNPAB	heterogeneous nuclear ribonucleoprotein A/B	-3.764	0	NM_001040522.1
																		NOP56	NOP56 ribonucleoprotein homolog (yeast)	-2.956	0.001	NM_001033622.1		LOC783376	ribosomal protein L7 pseudogene	-3.782	0	XR_083601.1
																		C29H11orf75	single-pass membrane protein with coiled-coil domains 4	-2.957	0.001	XM_002698992.2		MTA2	metastasis associated 1 family, member 2	-3.791	0	NM_001075712.1
																		DOPEY2	dopey family member 2	-2.957	0.001	XM_002685151.1		RPL17	ribosomal protein L17	-3.798	0	NM_001034459.1
																		TNFRSF1B	tumor necrosis factor receptor superfamily, member 1B	-2.961	0.001	NM_001040490.1		ITM2B	integral membrane protein 2B	-3.804	0	NM_001035093.1
																		ATP6V0C	ATPase, H+ transporting, lysosomal 16kDa, V0 subunit c	-2.962	0.001	NM_001017954.1		YBX1	Y box binding protein 1	-3.815	0	NM_174815.2
																		MFAP1	microfibrillar-associated protein 1	-2.979	0.001	NM_001034397.1		LOC100335666	uncharacterized LOC100335666	-3.823	0	XM_003587755.1
																		NHP2L1	NHP2 non-histone chromosome protein 2-like 1 (S. cerevisiae)	-2.982	0.001	NM_001077004.1		RPL26	ribosomal protein L26	-3.825	0	NM_001015512.2
																		RPSA	ribosomal protein SA	-2.987	0.001	NM_174379.2		LOC100848193	uncharacterized LOC100848193	-3.829	0	XM_003587667.1
																		AHCY	adenosylhomocysteinase	-2.989	0.001	NM_001034315.1		RPL10A	ribosomal protein L10a	-3.833	0	NM_001015647.1
																		ARRB2	arrestin, beta 2	-2.989	0.001	NM_001205277.1		HNRNPUL2	heterogeneous nuclear ribonucleoprotein U-like 2	-3.835	0	NM_001206245.1
																		FAM32A	family with sequence similarity 32, member A	-2.992	0.001	NM_001105004.1		CD79A	CD79a molecule, immunoglobulin-associated alpha	-3.846	0	NM_174266.3
																		EIF1	eukaryotic translation initiation factor 1	-2.993	0.001	NM_001014884.1		ERP29	endoplasmic reticulum protein 29	-3.852	0	NM_001076271.1
																		LOC100848406	uncharacterized LOC100848406	-2.995	0.001	XR_139406.1		STMN1	stathmin 1	-3.874	0	NM_001034790.1
																		NXPH1	neurexophilin 1	-2.995	0.001	NM_001034762.1		PJA2	praja ring finger 2	-3.877	0	NM_001100340.1
																		HNRNPUL2	heterogeneous nuclear ribonucleoprotein U-like 2	-3.004	0.001	NM_001206245.1		ARPC1B	actin related protein 2/3 complex, subunit 1B, 41kDa	-3.886	0	NM_001014844.2
																		PTMA	prothymosin, alpha (gene sequence 28)	-3.01	0	NM_001039953.1		EIF4B	eukaryotic translation initiation factor 4B	-3.887	0	NM_001035028.1
																		GANAB	glucosidase, alpha; neutral AB	-3.013	0.001	NM_001205777.1		RPL13	ribosomal protein L13	-3.892	0	NM_001015543.1
																		LOC534506	carbohydrate (N-acetylgalactosamine 4-sulfate 6-O) sulfotransferase 15	-3.013	0.001	XM_003587913.1		WDR1	WD repeat domain 1	-3.9	0	NM_001046346.1
																		LOC782525	eukaryotic translation elongation factor 1 gamma pseudogene	-3.014	0.001	XR_083733.1		DDX6	DEAD (Asp-Glu-Ala-Asp) box polypeptide 6	-3.901	0	NM_001143867.1
																		NACA	nascent polypeptide-associated complex alpha subunit	-3.016	0.001	NM_001014916.2		RPL34	ribosomal protein L34	-3.911	0	NM_001206221.1
																		LOC784087	nuclear casein kinase and cyclin-dependent kinase substrate 1 pseudogene	-3.017	0.001	XR_083845.1		LOC785568	mortality factor 4 like 1 pseudogene	-3.922	0	XR_083597.2
																		PGAM1	phosphoglycerate mutase 1 (brain)	-3.018	0.001	NM_001034054.1		LOC618297	high mobility group protein B2-like	-3.924	0	XM_002686665.1
																		ARPC5	actin related protein 2/3 complex, subunit 5, 16kDa	-3.02	0.001	NM_001035447.1		RPS7	ribosomal protein S7	-3.944	0	NM_001098874.1
																		EMP3	epithelial membrane protein 3	-3.023	0.001	NM_001024562.1		GRK6	G protein-coupled receptor kinase 6	-3.958	0	NM_001191530.1
																		RPS21	ribosomal protein S21	-3.029	0.001	NM_001040581.1		GRK6	G protein-coupled receptor kinase 6	-3.958	0	NM_001205390.1
																		TPM4	tropomyosin 4	-3.029	0.001	NM_001101162.1		SAT1	spermidine/spermine N1-acetyltransferase 1	-3.987	0	NM_001034333.1
																		RHOG	ras homolog gene family, member G (rho G)	-3.033	0.001	NM_001080305.1		RPLP1	ribosomal protein, large, P1	-3.991	0	NM_001025340.1
																		TOB2	transducer of ERBB2, 2	-3.036	0.001	NM_001083387.1		ATF4	activating transcription factor 4 (tax-responsive enhancer element B67)	-3.994	0	NM_001034342.1
																		LOC100848406	uncharacterized LOC100848406	-3.046	0.001	XR_139405.1		RPL4	ribosomal protein L4	-4.026	0	NM_001014894.1
																		MYADM	myeloid-associated differentiation marker	-3.046	0.001	NM_001075252.1		LTB	lymphotoxin beta (TNF superfamily, member 3)	-4.061	0	XM_002697371.1
																		OST4	oligosaccharyltransferase 4 homolog (S. cerevisiae)	-3.047	0.001	XM_002691457.1		RAC2	ras-related C3 botulinum toxin substrate 2 (rho family, small GTP binding protein Rac2)	-4.066	0	NM_175792.2
																		BHLHE40	basic helix-loop-helix family, member e40	-3.049	0.001	NM_001024929.1		ALDH2	aldehyde dehydrogenase 2 family (mitochondrial)	-4.068	0	NM_001075367.1
																		HSP90AB1	heat shock protein 90kDa alpha (cytosolic), class B member 1	-3.052	0.001	NM_001079637.1		PABPC1	poly(A) binding protein, cytoplasmic 1	-4.081	0	NM_174568.2
																		PTPN18	protein tyrosine phosphatase, non-receptor type 18 (brain-derived)	-3.055	0.001	NM_001078069.1		LFNG	LFNG O-fucosylpeptide 3-beta-N-acetylglucosaminyltransferase	-4.098	0	NM_001046222.1
																		DAGLB	diacylglycerol lipase, beta	-3.06	0.001	NM_001083487.1		GNAI2	guanine nucleotide binding protein (G protein), alpha inhibiting activity polypeptide 2	-4.116	0	NM_001101040.1
																		RPS13	ribosomal protein S13	-3.063	0.001	NM_001025342.2		UQCRH	ubiquinol-cytochrome c reductase hinge protein	-4.19	0	NM_001034745.1
																		TAGLN2	transgelin 2	-3.067	0.001	NM_001013599.1		TMCC3	transmembrane and coiled-coil domain family 3	-4.191	0	NM_001038063.1
																		ODC1	ornithine decarboxylase 1	-3.075	0.001	NM_174130.2		RPS25	ribosomal protein S25	-4.213	0	NM_001025315.1
																		PAQR8	progestin and adipoQ receptor family member VIII	-3.075	0.001	NM_001101135.1		CCND3	cyclin D3	-4.231	0	NM_001034709.1
																		CALM2	calmodulin 2 (phosphorylase kinase, delta)	-3.076	0.001	NM_001242587.1		RAB5C	RAB5C, member RAS oncogene family	-4.255	0	NM_001034743.2
																		RAB5C	RAB5C, member RAS oncogene family	-3.076	0.001	NM_001034743.2		CDH23	cadherin-related 23	-4.262	0	NM_001191206.1
																		SYF2	SYF2 homolog, RNA splicing factor (S. cerevisiae)	-3.076	0.001	XM_002685769.2		HMGB2	high mobility group box 2	-4.283	0	NM_001037616.1
																		C10H14orf166	chromosome 10 open reading frame, human C14orf166	-3.085	0	NM_001035280.1		RPL32	ribosomal protein L32	-4.338	0	NM_001034783.1
																		GAPDH	glyceraldehyde-3-phosphate dehydrogenase	-3.091	0	NM_001034034.1		LAPTM5	lysosomal protein transmembrane 5	-4.343	0	NM_001046118.1
																		SMARCD2	SWI/SNF related, matrix associated, actin dependent regulator of chromatin, subfamily d, member 2	-3.094	0	NM_001205462.1		IER5	immediate early response 5	-4.596	0	XM_002694216.2
																		ETFB	electron-transfer-flavoprotein, beta polypeptide	-3.096	0	NM_001038582.1		TMED9	transmembrane emp24 protein transport domain containing 9	-4.597	0	NM_001034812.1
																		PFKFB3	6-phosphofructo-2-kinase/fructose-2,6-biphosphatase 3	-3.103	0	NM_001077837.1		CD52	CD52 molecule	-4.617	0	NM_001198996.1
																		SAP18	Sin3A-associated protein, 18kDa	-3.105	0	NM_001035467.2		LDHB	lactate dehydrogenase B	-4.731	0	NM_174100.1
																		ENO1	enolase 1, (alpha)	-3.121	0	NM_174049.2		CCDC72	coiled-coil domain containing 72	-4.892	0	NM_001163803.1
																		TYROBP	TYRO protein tyrosine kinase binding protein	-3.125	0	NM_174627.1		CDC2L1	cell division cycle 2-like 1 (PITSLRE proteins)	-4.892	0	NM_001007811.2
																		LOC100336931	RNA polymerase II-associated factor 1 homolog-like	-3.138	0	XM_002695053.1
																		VAT1L	vesicle amine transport protein 1 homolog (T. californica)-like	-3.14	0	NM_001046624.1
																		ARHGAP30	Rho GTPase activating protein 30	-3.144	0	NM_001191499.1
																		EIF3CL	eukaryotic translation initiation factor 3, subunit C-like	-3.15	0	NM_001034618.1
																		LOC100335666	uncharacterized LOC100335666	-3.152	0	XM_003587755.1
																		PAF1	Paf1, RNA polymerase II associated factor, homolog (S. cerevisiae)	-3.164	0	NM_001046293.1
																		LOC100299317	60S ribosomal protein L23a-like	-3.168	0	XR_083581.1
																		SASH3	SAM and SH3 domain containing 3	-3.169	0	NM_001077998.1
																		FAIM3	Fas apoptotic inhibitory molecule 3	-3.175	0	XM_002693895.2
																		LOC789018	ribosomal protein L23a pseudogene	-3.177	0	XR_139713.1
																		EEF1G	eukaryotic translation elongation factor 1 gamma	-3.183	0	NM_001040487.1
																		TIMM13	translocase of inner mitochondrial membrane 13 homolog (yeast)	-3.183	0	NM_001080277.1
																		UBC	ubiquitin C	-3.183	0	NM_001206307.1
																		DOCK7	dedicator of cytokinesis 7	-3.188	0	NM_001192906.2
																		CORO1A	coronin, actin binding protein, 1A	-3.191	0	NM_174521.2
																		HMGB1	high mobility group box 1	-3.191	0	NM_176612.1
																		BRD4	bromodomain containing 4	-3.192	0	XM_002688561.2
																		GPX1	glutathione peroxidase 1	-3.192	0	NM_174076.3
																		TUBB4B	tubulin, beta 2C	-3.198	0	NM_001034663.1
																		POLD1	polymerase (DNA directed), delta 1, catalytic subunit	-3.199	0	NM_174427.2
																		TMED9	transmembrane emp24 protein transport domain containing 9	-3.205	0	NM_001034812.1
																		RPS2	ribosomal protein S2	-3.206	0	NM_001033613.1
																		NME2	non-metastatic cells 2, protein (NM23B) expressed in	-3.209	0	NM_001076376.1
																		UBA52	ubiquitin A-52 residue ribosomal protein fusion product 1	-3.21	0	NM_001076363.1
																		CERS2	ceramide synthase 2	-3.218	0	NM_001034667.1
																		DAD1	defender against cell death 1	-3.218	0	NM_001034761.1
																		GDI1	GDP dissociation inhibitor 1	-3.221	0	NM_174064.3
																		LOC613595	L-lactate dehydrogenase B chain-like	-3.222	0	XM_003585668.1
																		LOC100848571	uncharacterized LOC100848571	-3.226	0	XR_139606.1
																		SLC4A8	solute carrier family 4, sodium bicarbonate cotransporter, member 8	-3.232	0	XM_002687293.2
																		MRFAP1	Morf4 family associated protein 1	-3.239	0	NM_001035344.1
																		LOC100848913	uncharacterized LOC100848913	-3.24	0	XR_139376.1
																		LOC100300305	elongation factor 1-alpha, somatic form-like	-3.246	0	XM_002697497.2
																		NEDD8	neural precursor cell expressed, developmentally down-regulated 8	-3.262	0	NM_174764.3
																		KCP	collagen alpha-1(I) chain-like	-3.265	0	XM_002686948.2
																		MYD88	myeloid differentiation primary response gene (88)	-3.267	0	NM_001014382.2
																		RAC2	ras-related C3 botulinum toxin substrate 2 (rho family, small GTP binding protein Rac2)	-3.271	0	NM_175792.2
																		NPM1	nucleophosmin (nucleolar phosphoprotein B23, numatrin)	-3.272	0	NM_001035441.1
																		NFE2	nuclear factor (erythroid-derived 2), 45kDa	-3.277	0	NM_001014923.1
																		COX6C	cytochrome c oxidase subunit VIc	-3.279	0	XM_002690379.1
																		RPL35A	ribosomal protein L35a	-3.284	0	NM_001025321.2
																		CCNG1	cyclin G1	-3.291	0	NM_001013364.1
																		MYH9	myosin, heavy chain 9, non-muscle	-3.292	0	NM_001192762.1
																		UBL5	ubiquitin-like 5	-3.293	0	NM_001037710.1
																		LOC100138493	uncharacterized LOC100138493	-3.294	0	XR_139540.1
																		LLPH	LLP homolog, long-term synaptic facilitation (Aplysia)	-3.302	0	NM_001038522.1
																		ANP32A	acidic (leucine-rich) nuclear phosphoprotein 32 family, member A	-3.306	0	NM_001195019.1
																		SF3B2	splicing factor 3b, subunit 2, 145kDa	-3.319	0	NM_001103271.1
																		S100A4	S100 calcium binding protein A4	-3.337	0	NM_174595.2
																		RPL36A	ribosomal protein L36a-like	-3.343	0	NM_001034316.1
																		GABARAP	GABA(A) receptor-associated protein	-3.346	0	NM_001034048.1
																		MIDN	midnolin	-3.346	0	XM_002689146.2
																		TCEAL4	transcription elongation factor A (SII)-like 4	-3.356	0	XM_002699844.2
																		LOC782479	60S ribosomal protein L26-like	-3.361	0	XR_083794.1
																		C9H6orf170	TBC1 domain family, member 32	-3.37	0	XM_002690075.1
																		BTG2	BTG family, member 2	-3.375	0	XM_002693879.1
																		RPS15	ribosomal protein S15	-3.387	0	NM_001024541.1
																		IER5	immediate early response 5	-3.394	0	XM_002694216.2
																		ITGB6	integrin, beta 6	-3.395	0	NM_174698.2
																		OAZ1	ornithine decarboxylase antizyme 1	-3.399	0	NM_001127243.1
																		SLC2A3	solute carrier family 2 (facilitated glucose transporter), member 3	-3.4	0	NM_174603.3
																		HNRNPUL1	heterogeneous nuclear ribonucleoprotein U-like 1	-3.402	0	NM_001083466.1
																		GNB2L1	guanine nucleotide binding protein (G protein), beta polypeptide 2-like 1	-3.403	0	NM_175802.2
																		LOC789587	ribosomal protein L17 pseudogene	-3.422	0	XR_139553.1
																		RPS5	ribosomal protein S5	-3.427	0	NM_001015531.1
																		CFL1	cofilin 1 (non-muscle)	-3.434	0	NM_001015655.1
																		LOC614922	heterogeneous nuclear ribonucleoprotein A1 pseudogene	-3.443	0	XM_003586990.1
																		PEBP1	phosphatidylethanolamine binding protein 1	-3.445	0	NM_001033623.1
																		RPL10	ribosomal protein L10	-3.445	0	NM_174760.2
																		GRK6	G protein-coupled receptor kinase 6	-3.448	0	NM_001191530.1
																		LOC100299845	60S ribosomal protein L5-like	-3.448	0	XR_083789.2
																		HNRNPAB	heterogeneous nuclear ribonucleoprotein A/B	-3.463	0	NM_001040522.1
																		LOC785386	ribosomal protein L10-like	-3.463	0	XM_002687966.1
																		RPL27	ribosomal protein L27	-3.468	0	NM_001034051.1
																		LDB1	LIM domain binding 1	-3.473	0	XM_002698449.2
																		RPS18	ribosomal protein S18	-3.473	0	NM_001033614.1
																		ARPC1B	actin related protein 2/3 complex, subunit 1B, 41kDa	-3.475	0	NM_001014844.2
																		ATXN7L3B	ataxin 7-like 3B	-3.478	0	NM_001078161.2
																		LOC785568	mortality factor 4 like 1 pseudogene	-3.483	0	XR_083597.2
																		FAU	Finkel-Biskis-Reilly murine sarcoma virus (FBR-MuSV) ubiquitously expressed	-3.486	0	NM_174731.3
																		RARA	retinoic acid receptor, alpha	-3.495	0	NM_001014942.2
																		UBAP1L	ubiquitin associated protein 1-like	-3.503	0	XM_002690466.1
																		SPI1	spleen focus forming virus (SFFV) proviral integration oncogene spi1	-3.505	0	NM_001192133.1
																		LTB	lymphotoxin beta (TNF superfamily, member 3)	-3.509	0	XM_002697371.1
																		EDA	ectodysplasin A	-3.516	0	NM_001081743.2
																		RPS11	ribosomal protein S11	-3.523	0	NM_001024568.1
																		PUF60	poly-U binding splicing factor 60KDa	-3.526	0	NM_001046133.1
																		GMFG	glia maturation factor, gamma	-3.527	0	NM_001024537.1
																		SSR2	signal sequence receptor, beta (translocon-associated protein beta)	-3.53	0	NM_001015533.1
																		PABPC1	poly(A) binding protein, cytoplasmic 1	-3.533	0	NM_174568.2
																		TUBA1A	tubulin, alpha 1a	-3.542	0	NM_001166505.1
																		MYL6	myosin, light chain 6, alkali, smooth muscle and non-muscle	-3.543	0	NM_175780.1
																		RPL12	ribosomal protein L12	-3.543	0	NM_205797.1
																		LOC100335936	ribosomal protein L9 pseudogene	-3.544	0	XR_083897.1
																		LDHB	lactate dehydrogenase B	-3.547	0	NM_174100.1
																		LOC100848688	uncharacterized LOC100848688	-3.557	0	XR_139378.1
																		TUBA1B	tubulin, alpha 1b	-3.558	0	NM_001114856.1
																		CCND3	cyclin D3	-3.564	0	NM_001034709.1
																		NID2	nidogen 2 (osteonidogen)	-3.564	0	NM_001102065.1
																		PCSK6	proprotein convertase subtilisin/kexin type 6	-3.564	0	XM_002696654.2
																		LOC100848296	uncharacterized LOC100848296	-3.578	0	XR_139389.1
																		LOC100295976	uncharacterized LOC100295976	-3.579	0	XM_002687287.2
																		RPS26	ribosomal protein S26	-3.588	0	NM_001015561.2
																		KARS	lysyl-tRNA synthetase	-3.591	0	NM_001034356.1
																		RPL36AL	ribosomal protein L36a-like	-3.602	0	NM_001079508.1
																		LOC782437	ribosomal protein L7 pseudogene	-3.63	0	XR_083791.1
																		LOC783376	ribosomal protein L7 pseudogene	-3.648	0	XR_083601.1
																		LOC100296121	zinc finger protein 132-like	-3.656	0	XM_002695444.2
																		LOC100337215	peptidylprolyl isomerase A (cyclophilin A)-like	-3.656	0	XM_002690515.2
																		LOC100296205	ribosomal protein L36 pseudogene	-3.664	0	XR_083670.2
																		LOC100337180	eukaryotic translation elongation factor 1 alpha 1 pseudogene	-3.676	0	XR_139374.1
																		LOC783641	ribosomal protein L12 pseudogene	-3.676	0	XM_003587379.1
																		LAPTM5	lysosomal protein transmembrane 5	-3.682	0	NM_001046118.1
																		EIF3D	eukaryotic translation initiation factor 3, subunit D	-3.683	0	NM_001034484.1
																		ATF4	activating transcription factor 4 (tax-responsive enhancer element B67)	-3.684	0	NM_001034342.1
																		MTA2	metastasis associated 1 family, member 2	-3.692	0	NM_001075712.1
																		SAT1	spermidine/spermine N1-acetyltransferase 1	-3.699	0	NM_001034333.1
																		CALM3	calmodulin 3 (phosphorylase kinase, delta)	-3.703	0	NM_001046249.1
																		PTMA	prothymosin, alpha (gene sequence 28)	-3.725	0	XM_003585780.1
																		LOC614643	ribosomal protein L23a pseudogene	-3.732	0	XR_083624.1
																		LOC613460	ribosomal protein S3A pseudogene	-3.738	0	XR_083611.1
																		PJA2	praja ring finger 2	-3.741	0	NM_001100340.1
																		APEX1	APEX nuclease (multifunctional DNA repair enzyme) 1	-3.752	0	NM_176609.3
																		WDR31	WD repeat domain 31	-3.757	0	XM_002689937.2
																		YBX1	Y box binding protein 1	-3.76	0	NM_174815.2
																		LOC781576	mCG1723-like	-3.765	0	XM_003585885.1
																		SUN2	Sad1 and UNC84 domain containing 2	-3.767	0	NM_001102319.1
																		TOMM22	translocase of outer mitochondrial membrane 22 homolog (yeast)	-3.781	0	NM_001100335.1
																		RPLP0	ribosomal protein, large, P0	-3.783	0	NM_001012682.1
																		RPL9	ribosomal protein L9	-3.808	0	NM_001024469.2
																		LOC782776	eukaryotic translation elongation factor 1 alpha 1 pseudogene	-3.81	0	XR_083578.2
																		PSME1	proteasome (prosome, macropain) activator subunit 1 (PA28 alpha)	-3.812	0	NM_001024509.2
																		EEF1A1	eukaryotic translation elongation factor 1 alpha 1	-3.823	0	NM_174535.1
																		LOC788541	ribosomal protein L7 pseudogene	-3.824	0	XR_083686.2
																		ADAT1	adenosine deaminase, tRNA-specific 1	-3.833	0	NM_001081620.1
																		CRISP3	cysteine-rich secretory protein 3	-3.833	0	NM_001079635.1
																		ACTG1	actin, gamma 1	-3.836	0	NM_001033618.1
																		RPL17	ribosomal protein L17	-3.849	0	NM_001034459.1
																		HMGB2	high mobility group box 2	-3.853	0	NM_001037616.1
																		RPL7	ribosomal protein L7	-3.854	0	NM_001014928.1
																		EEF2	eukaryotic translation elongation factor 2	-3.869	0	NM_001075121.1
																		CHCHD2	coiled-coil-helix-coiled-coil-helix domain containing 2	-3.87	0	NM_001034746.1
																		RPL26	ribosomal protein L26	-3.873	0	NM_001015512.2
																		LOC781576	mCG1723-like	-3.877	0	XM_003585884.1
																		CLIC1	chloride intracellular channel 1	-3.887	0	NM_001015608.1
																		DNAI1	dynein, axonemal, intermediate chain 1	-3.911	0	NM_001038142.1
																		RPL3	ribosomal protein L3	-3.912	0	NM_174715.1
																		RPLP2	ribosomal protein, large, P2	-3.916	0	NM_174788.3
																		SERBP1	SERPINE1 mRNA binding protein 1	-3.917	0	NM_001046449.1
																		HMGN2	high mobility group nucleosomal binding domain 2	-3.926	0	NM_001098945.1
																		LOC618297	high mobility group protein B2-like	-3.949	0	XM_002686665.1
																		LOC781070	elongation factor 1-alpha 1-like	-3.961	0	XR_083751.1
																		RPL8	ribosomal protein L8	-3.987	0	NM_001034625.1
																		UQCRH	ubiquinol-cytochrome c reductase hinge protein	-4.001	0	NM_001034745.1
																		LOC782954	elongation factor 1-alpha 1-like	-4.009	0	XR_084029.1
																		EIF4B	eukaryotic translation initiation factor 4B	-4.021	0	NM_001035028.1
																		EPHX2	epoxide hydrolase 2, cytoplasmic	-4.039	0	NM_001075534.1
																		RPS28	ribosomal protein S28	-4.039	0	NM_001025316.1
																		CD79A	CD79a molecule, immunoglobulin-associated alpha	-4.04	0	NM_174266.3
																		C8H9orf80	chromosome 8 open reading frame, human C9orf80	-4.043	0	NM_001078064.1
																		LOC100848479	uncharacterized LOC100848479	-4.055	0	XM_003587527.1
																		RPS17	ribosomal protein S17	-4.062	0	NM_001099210.1
																		LASP1	LIM and SH3 protein 1	-4.078	0	NM_001035394.1
																		RPL37	ribosomal protein L37	-4.083	0	NM_001078132.1
																		LOC508628	ribosomal protein S6 pseudogene	-4.118	0	NM_001015548.1
																		RPL23	ribosomal protein L23	-4.118	0	NM_001035014.1
																		RPS6	ribosomal protein S6	-4.133	0	XM_003586371.1
																		LFNG	LFNG O-fucosylpeptide 3-beta-N-acetylglucosaminyltransferase	-4.149	0	NM_001046222.1
																		RPL5	ribosomal protein L5	-4.157	0	NM_001035306.1
																		MYEOV2	myeloma overexpressed 2	-4.191	0	NM_001195051.1
																		RPL14	ribosomal protein L14	-4.203	0	NM_001034674.1
																		LOC100848780	uncharacterized LOC100848780	-4.224	0	XM_003586094.1
																		LOC785954	ribosomal protein S10 pseudogene	-4.23	0	XR_083660.1
																		LOC618220	ribosomal protein L6 pseudogene	-4.236	0	XR_083644.2
																		RPL36	ribosomal protein L36	-4.255	0	NM_001078139.1
																		LOC100847354	uncharacterized LOC100847354	-4.262	0	XM_003587372.1
																		RPS3A	ribosomal protein S3A	-4.311	0	NM_001034038.1
																		ZNF197	zinc finger protein 197	-4.312	0	NM_001206813.1
																		GNAI2	guanine nucleotide binding protein (G protein), alpha inhibiting activity polypeptide 2	-4.32	0	NM_001101040.1
																		LOC790088	40S ribosomal protein S28-like	-4.32	0	XR_084093.2
																		LOC100848359	elongation factor 1-alpha 1-like	-4.335	0	XM_003587615.1
																		RPL19	ribosomal protein L19	-4.34	0	NM_001040516.1
																		RPL19	ribosomal protein L19	-4.375	0	XM_002695953.1
																		ACSL3	acyl-CoA synthetase long-chain family member 3	-4.382	0	NM_001205468.1
																		RPLP1	ribosomal protein, large, P1	-4.39	0	NM_001025340.1
																		LOC782021	ribosomal protein L21 pseudogene	-4.403	0	XR_084028.1
																		RPL13A	ribosomal protein L13a	-4.42	0	NM_001076998.1
																		LOC783838	eukaryotic translation elongation factor 1 alpha 1 pseudogene	-4.435	0	XR_083736.2
																		RPS25	ribosomal protein S25	-4.458	0	NM_001025315.1
																		PRKAR2A	protein kinase, cAMP-dependent, regulatory, type II, alpha	-4.465	0	NM_001191367.1
																		RPS10	ribosomal protein S10	-4.47	0	NM_001034716.1
																		RPL37A	ribosomal protein L37a	-4.473	0	NM_001035008.1
																		RPS24	ribosomal protein S24	-4.476	0	NM_001025339.1
																		LOC613519	ribosomal protein L3 pseudogene	-4.486	0	XR_083776.2
																		RPL31	ribosomal protein L31	-4.488	0	NM_001025341.2
																		CCDC72	coiled-coil domain containing 72	-4.498	0	NM_001163803.1
																		WDR1	WD repeat domain 1	-4.507	0	NM_001046346.1
																		EEF1B2	eukaryotic translation elongation factor 1 beta 2	-4.509	0	NM_001014936.1
																		FGF18	fibroblast growth factor 18	-4.54	0	NM_001076007.1
																		LOC781813	eukaryotic translation elongation factor 1 alpha 1 pseudogene	-4.554	0	XR_083620.2
																		RPS27A	ribosomal protein S27a	-4.567	0	NM_174778.1
																		LOC787404	ribosomal protein S20-like	-4.573	0	XM_002697700.2
																		RPS16	ribosomal protein S16	-4.585	0	NM_001033624.1
																		LOC781381	nascent polypeptide-associated complex alpha subunit pseudogene	-4.622	0	XR_083742.2
																		RPL35	ribosomal protein L35	-4.642	0	NM_001034495.1
																		LOC789867	eukaryotic translation elongation factor 1 alpha 1 pseudogene	-4.643	0	XR_083807.1
																		CDH23	cadherin-related 23	-4.66	0	NM_001191206.1
																		RPS23	ribosomal protein S23	-4.661	0	NM_001034690.1
																		RPL21	ribosomal protein L21	-4.696	0	NM_001191412.1
																		LOC784572	suppressor of Ty 20 homolog (S. cerevisiae)	-4.7	0	XM_002700336.1
																		RPL34	ribosomal protein L34	-4.714	0	NM_001206221.1
																		RPS8	ribosomal protein S8	-4.726	0	NM_001025317.1
																		RPS12	ribosomal protein S12	-4.762	0	NM_001014387.1
																		LOC784473	ribosomal protein S12 pseudogene	-4.777	0	XR_139324.1
																		LOC784243	ribosomal protein L34 pseudogene	-4.834	0	XR_139437.1
																		LOC100847811	60S ribosomal protein L24-like	-4.838	0	XR_139700.1
																		DTD1	D-tyrosyl-tRNA deacylase 1 homolog (S. cerevisiae)	-4.852	0	NM_001038104.1
																		CD52	CD52 molecule	-4.892	0	NM_001198996.1
																		CDC2L1	cell division cycle 2-like 1 (PITSLRE proteins)	-4.892	0	NM_001007811.2
																		LOC100848193	uncharacterized LOC100848193	-4.892	0	XM_003587667.1
																		RPL10A	ribosomal protein L10a	-4.892	0	NM_001015647.1
																		RPL11	ribosomal protein L11	-4.892	0	NM_001075581.1
																		RPL13	ribosomal protein L13	-4.892	0	NM_001015543.1
																		RPL27A	ribosomal protein L27a	-4.892	0	NM_001024471.1
																		RPL32	ribosomal protein L32	-4.892	0	NM_001034783.1
																		RPL4	ribosomal protein L4	-4.892	0	NM_001014894.1
																		RPL6	ribosomal protein L6	-4.892	0	NM_001031756.1
																		RPS20	ribosomal protein S20	-4.892	0	NM_001034438.1
																		RPS4X	ribosomal protein S4, X-linked	-4.892	0	NM_001035445.1
																		RPS7	ribosomal protein S7	-4.892	0	NM_001098874.1
																		STMN1	stathmin 1	-4.892	0	NM_001034790.1
																		TMSB4	thymosin beta 4, X-linked	-4.892	0	NM_001113231.1
																		TMSB4X	thymosin beta 4, X-linked	-4.892	0	NM_001002885.1
[truncated: 3 more columns]
