# Supplementary material for: Correlative Gene Expression to Protective Seroconversion in Rift Valley Fever Vaccinates
Source: PLoS One. 2016 Jan 19;11(1):e0147027. doi: 10.1371/journal.pone.0147027 (PMC4718665; doi:10.1371/journal.pone.0147027)
Supplement: S17 Table — (XLSX) [file pone.0147027.s017.xlsx]

## Sheet: Sheet1
	Supplementary Table S17. DBGGA vs GAGE Kolmogorov-Smirnov Overlapping Pathways by time pre-serum neutralization
	Time -6	Time -5	Time -4	Time -3	Time -2	Time -1	Time 0	Time 1
	bta04610 Complement and coagulation cascades	bta04062 Chemokine signaling pathway	bta03010 Ribosome	bta03010 Ribosome	bta03010 Ribosome	bta04020 Calcium signaling pathway	bta03010 Ribosome	bta03010 Ribosome
		bta04360 Axon guidance	bta04020 Calcium signaling pathway	bta04020 Calcium signaling pathway	bta04020 Calcium signaling pathway	bta04062 Chemokine signaling pathway	bta04062 Chemokine signaling pathway	bta04062 Chemokine signaling pathway
		bta04540 Gap junction	bta04062 Chemokine signaling pathway	bta04540 Gap junction	bta04062 Chemokine signaling pathway	bta04510 Focal adhesion	bta04510 Focal adhesion	bta04540 Gap junction
		bta04740 Olfactory transduction	bta04540 Gap junction		bta04510 Focal adhesion	bta04512 ECM-receptor interaction	bta04512 ECM-receptor interaction	bta04610 Complement and coagulation cascades
					bta04512 ECM-receptor interaction	bta04540 Gap junction	bta04540 Gap junction
					bta04540 Gap junction	bta04724 Glutamatergic synapse	bta04612 Antigen processing and presentation
					bta04610 Complement and coagulation cascades	bta04916 Melanogenesis	bta04666 Fc gamma R-mediated phagocytosis
					bta04724 Glutamatergic synapse		bta04724 Glutamatergic synapse
